# Supplementary material for: Synthetically amenable amide derivatives of tosylated-amino acids as organocatalysts for enantioselective allylation of aldehydes: computational rationale for enantioselectivity
Source: Royal Society of Chemistry journal article supplement (doi:10.1039/c3ob27513b), 2013-01-01
Supplement: c3ob27513b.pdf [file c3ob27513b.pdf]

## Supporting Information

### Synthetically amenable amide derivatives of tosylated-amino acids asorganocatalysts for enantioselective allylation of aldehydes: computational-rationale for enantioselectivity

Debashis Ghosh,<sup>a</sup> Debashis Sahu,<sup>b</sup> S. Saravanan,<sup>a</sup> Sayed H. R. Abdi,<sup>\*a</sup> Bishwajit Ganguly,<sup>\*b</sup>  
Noor-ul H. Khan,<sup>a</sup> Rukhsana I. Kureshy<sup>a</sup> and Hari C. Bajaj<sup>a</sup>

| Contents                                                                                                                                                                                                                                                 | Pages |
|----------------------------------------------------------------------------------------------------------------------------------------------------------------------------------------------------------------------------------------------------------|-------|
| Experimental                                                                                                                                                                                                                                             |       |
| General information                                                                                                                                                                                                                                      | S2    |
| Characterization data of the products                                                                                                                                                                                                                    | S3    |
| HPLC chromatograms for the products                                                                                                                                                                                                                      | S10   |
| Copy of <sup>1</sup> H and <sup>13</sup> C spectra of the products                                                                                                                                                                                       | S29   |
| Copy of <sup>1</sup> H and <sup>13</sup> C spectra of all catalysts                                                                                                                                                                                      | S31   |
| Mechanism study                                                                                                                                                                                                                                          | S41   |
| Quantum chemical calculation details                                                                                                                                                                                                                     |       |
| Figure I: PBEPBE/6-31G(d) optimized transition state geometries and corresponding their free energy of activation (kJ/mole) from reactants to transition state in CH <sub>2</sub> Cl <sub>2</sub> solvent catalyzed by catalyst ( <i>S,R</i> )- <b>3</b> | S45   |
| Table I: PBEPBE/6-31G(d) +B97D/6-31G//PBEPBE/6-31G(d) calculated electronic energy difference (kJ/mol) between <i>R</i> and <i>S</i> transition states for fluoro substituted benzaldehydes                                                              | S45   |
| Table II: Total electronic energies of all the systems calculated at the PBEPBE/6-31G(d) level of theory in gas phase and solvent phase                                                                                                                  | S46   |
| Table III: PBEPBE/6-31G(d) calculated Gibbs free energies for all the systems in gas phase                                                                                                                                                               | S47   |
| Table IV: Coordinates for the structures optimized at the PBEPBE/6-31G(d) level of theory                                                                                                                                                                | S48   |
| References                                                                                                                                                                                                                                               | S65   |

## General information

All reactions were performed in oven-dried (150 °C) glassware under an atmosphere of nitrogen with magnetic stirring unless otherwise indicated. 4Å MS was activated at 120 °C for overnight. Different aldehydes and reagents were used as received. All the solvents used in the present study were dried following known purification technique.<sup>1</sup> <sup>1</sup>H and <sup>13</sup>C spectra were taken in CDCl<sub>3</sub> and in CD<sub>3</sub>COCD<sub>3</sub> in special cases. For <sup>1</sup>H NMR (200 and 500 MHz), tetramethylsilane (TMS) served as internal standard ( $\delta = 0$  ppm) and data are reported as follows: chemical shift (in ppm), multiplicity (s = singlet, d = doublet, t = triplet, q = quartet, m = multiplet, br = broad), coupling constant (in Hz), and integration. For <sup>13</sup>C NMR (50 MHz and 125 MHz), CDCl<sub>3</sub>(CD<sub>3</sub>COCD<sub>3</sub> in special cases) was used as internal standard and spectra were obtained with complete proton decoupling. FTIR spectra were carried out using KBr. Optical rotations of the allylation products and the catalysts were recorded on an automatic Polari meter. All the products were purified by flash chromatography using silica gel 100-200 mesh. Enantiomeric excess (ee) were determined by HPLC using OD-H, AS-H, IA, IBand IC chiral columns with 2-propanol/hexane as eluent.

### Characterization data for the Homoallyl Alcohols

**(S)-1-phenylbut-3-en-1-ol (compound 2a):**<sup>2</sup> The product was isolated as a colorless oil (yield 46 mg, 78%) after purification by silica gel chromatography (Hexane/EtOAc = 95:5). Reaction time = 10 h. <sup>1</sup>H NMR (CDCl<sub>3</sub>, 500 MHz): δ = 2.04 (d, *J* = 3.1 Hz, 1H), 2.46-2.57 (m, 2H), 4.73-4.75 (m, 1H), 5.13-5.19 (m, 2H), 5.77-7.85 (m, 1H), 7.26-7.36 (m, 5H). <sup>13</sup>C NMR (CDCl<sub>3</sub>, 50 MHz): δ = 43.8, 73.2, 118.4, 125.8, 127.5, 128.4, 134.4, 143.8. HPLC (Daicel Chiralcel OD-H, hexanes/2-propanol = 95:5, flow rate = 0.4 mL/min, λ = 220 nm) *t*<sub>major(S)</sub> = 22.1 min, *t*<sub>minor(R)</sub> = 20.7 min.

**(S)-1-(4-methoxyphenyl)but-3-en-1-ol (compound 2b):**<sup>2,3</sup> The product was isolated as a yellowish oil (yield 50 mg, 70%) after purification by silica gel chromatography (Hexane/EtOAc = 92:8). Reaction time = 14 h. <sup>1</sup>H NMR (CDCl<sub>3</sub>, 500 MHz): δ = 1.99 (br, 1H), 2.48-2.51 (t, *J* = 6.5 Hz, 2H), 3.80 (s, 3H), 4.68-4.70 (t, *J* = 6.5 Hz, 1H), 5.12-5.17 (m, 2H), 5.76-5.84 (m, 1H), 6.87-6.89 (m, 2H), 7.26-7.29 (m, 2H). <sup>13</sup>C NMR (CDCl<sub>3</sub>, 50 MHz): δ = 43.7, 55.2, 73.3, 113.7, 118.2, 127, 134.6, 136.3, 159. Optical Rotation: [α]<sub>D</sub><sup>27</sup> = -60 (c 1.0, CHCl<sub>3</sub>).<sup>3</sup> HPLC (Daicel Chiralcel OD-H, hexanes/2-propanol = 95:5, flow rate = 0.8 mL/min, λ = 230 nm) *t*<sub>major(S)</sub> = 13.3 min, *t*<sub>minor(R)</sub> = 11.9 min.

**(4-benzyloxyphenyl)but-3-en-1-ol (compound 2c):** The product was isolated as a colorless oil (yield 66 mg, 65%) after purification by silica gel chromatography (Hexane/EtOAc = 90:10). Reaction time = 15 h. <sup>1</sup>H NMR (CDCl<sub>3</sub>, 500 MHz): δ = 1.98 (br, 1H), 2.48-2.51 (t, *J* = 6.5 Hz, 2H), 4.67-4.70 (t, *J* = 6 Hz, 1H), 5.06 (s, 2H), 5.12-5.17 (m, 2H), 5.76-5.84 (m, 1H), 6.95-6.96 (d, *J* = 8.5 Hz, 2H), 7.25-7.44 (m, 7H). <sup>13</sup>C NMR (CDCl<sub>3</sub>, 125 MHz): δ = 45.1, 71.4, 74.3, 116.1, 119.7, 128.5, 128.9, 129.3, 130, 136, 137.7, 159.6. Optical Rotation:

$[\alpha]_{\text{D}}^{27} = -52$  (c 1.0,  $\text{CHCl}_3$ ). HPLC (Daicel Chiralpak IC column, hexanes/2-propanol = 98:2, flow rate = 0.8 mL/min,  $\lambda = 230$  nm)  $t(\text{major}) = 33.1$  min,  $t(\text{minor}) = 29.5$  min.

**(S)-1-(4-*tert*-Butylphenyl)-3-buten-1-ol (compound 2d):**<sup>4</sup> The product was isolated as a colorless oil (yield 58 mg, 71%) after purification by silica gel chromatography (Hexane/EtOAc = 95:5). Reaction time = 15 h. <sup>1</sup>H NMR ( $\text{CDCl}_3$ , 200 MHz):  $\delta = 1.30$  (s, 9H), 2.45-2.47 (m, 3H), 2.62-2.63 (m, 1H), 5.06-5.12 (m, 2H), 5.72-5.81 (m, 1H), 7.23-7.34 (m, 4H). <sup>13</sup>C NMR ( $\text{CDCl}_3$ , 50 MHz):  $\delta = 31.1, 34.2, 43.3, 72.9, 117.7, 125, 125.3, 134.5, 140.7, 150.1$ . Optical Rotation:  $[\alpha]_{\text{D}}^{27} = -30.2$  (c 1,  $\text{Et}_2\text{O}$ ).<sup>4</sup> HPLC (Daicel Chiralpak IA, hexanes/2-propanol = 96:4, flow rate = 0.4 mL/min,  $\lambda = 254$  nm)  $t_{\text{major}}(\text{S}) = 18.6$  min,  $t_{\text{minor}}(\text{R}) = 17.3$  min.

**(S)-1-(*p*-tolyl)but-3-en-1-ol (compound 2e):**<sup>2</sup> The product was isolated as a colorless oil (yield 42 mg, 65%) after purification by silica gel chromatography (Hexane/EtOAc = 96:4). Reaction time = 15 h. <sup>1</sup>H NMR ( $\text{CDCl}_3$ , 500 MHz):  $\delta = 2.06$  (br, 1H), 2.34 (s, 3H), 2.49-2.50 (m, 2H), 4.67-4.70 (t,  $J = 6.5$  Hz, 1H), 5.11-5.16 (m, 2H), 5.77-5.82 (m, 1H), 5.75-5.83 (m, 1H), 7.14-7.24 (m, 5H). <sup>13</sup>C NMR ( $\text{CDCl}_3$ , 125 MHz):  $\delta = 21.1, 43.7, 73.1, 118.2, 125.7, 129, 134.5, 140.9$ . Optical Rotation:  $[\alpha]_{\text{D}}^{27} = -45.1$  (c 1,  $\text{CHCl}_3$ ).<sup>5</sup> HPLC (Daicel Chiralcel OD-H, hexanes/2-propanol = 99:1, flow rate = 0.5 mL/min,  $\lambda = 220$  nm)  $t_{\text{major}}(\text{S}) = 34.5$  min,  $t_{\text{minor}}(\text{R}) = 32$  min. **(S)-1-(4-nitrophenyl)but-3-en-1-ol (compound 2f):**<sup>6</sup> The product was isolated as a pale yellow oil (yield 54 mg, 70%) after purification by silica gel chromatography (Hexane/EtOAc = 90:10). Reaction time = 12 h. <sup>1</sup>H NMR ( $\text{CDCl}_3$ , 500 MHz):  $\delta = 2.17$  (br, 1H), 2.42-2.48 (m, 1H), 2.55-2.59 (m, 1H), 4.86-4.88 (m, 1H), 5.17-5.21 (m, 2H), 5.75-5.83 (m, 1H), 7.53-7.55 (d,  $J = 8.5$  Hz, 2H), 8.20-8.22 (d,  $J = 8.5$  Hz, 2H). <sup>13</sup>C NMR ( $\text{CDCl}_3$ , 50 MHz):  $\delta = 43.9, 72.1, 119.6, 123.6, 126.5, 133.1, 151$ . Optical Rotation:  $[\alpha]_{\text{D}}^{27} = -56.5$  (c 1.0,  $\text{CHCl}_3$ ).<sup>7</sup> HPLC (Daicel Chiralpak IA, hexanes/2-propanol = 99:1, flow rate = 1 mL/min,  $\lambda = 220$  nm)  $t_{\text{major}}(\text{S}) = 63.3$  min,  $t_{\text{minor}}(\text{R}) = 58.9$  min.

**(S)-1-(4-fluorophenyl)but-3-en-1-ol (compound 2g):**<sup>6</sup> The product was isolated as a colorless oil (yield 50 mg, 76%) after purification by silica gel chromatography (Hexane/EtOAc = 92:8). Reaction time = 12 h. <sup>1</sup>H NMR (CDCl<sub>3</sub>, 500 MHz): δ = 2.04 (br, 1H), 2.43-2.53 (m, 2H), 4.71-4.74 (m, 1H), 5.14-5.17 (m, 2H), 5.74-5.82 (m, 1H), 7.01-7.04 (t, *J* = 8.5), 7.31-7.34 (m, 2H). <sup>13</sup>C NMR (CDCl<sub>3</sub>, 125 MHz): δ = 45.3, 74, 116.5, 116.7, 120.1, 128.8, 135.5. Optical Rotation: [α]<sup>27</sup><sub>D</sub> = -31.5 (c 1.0, CHCl<sub>3</sub>).<sup>8</sup> HPLC (Daicel Chiralpak AS-H, hexanes/2-propanol = 99.5:0.5, flow rate = 0.8 mL/min, λ = 220 nm) *t*<sub>major(S)</sub> = 28.6 min, *t*<sub>minor(R)</sub> = 26.1 min.

**(S)-1-(4-chlorophenyl)but-3-en-1-ol (compound 2h):**<sup>2,3,6</sup> The product was isolated as a yellowish oil (yield 54 mg, 75%) after purification by silica gel chromatography (Hexane/EtOAc = 95:5). Reaction time = 12 h. <sup>1</sup>H NMR (CDCl<sub>3</sub>, 500 MHz): δ = 2.15 (br, 1H), 2.41-2.52 (m, 2H), 4.69-4.72 (dd, *J* = 2.5, 5 Hz, 1H), 5.13-5.16 (m, 2H), 5.73-5.81 (m, 1H), 7.26-7.32 (m, 4H). <sup>13</sup>C NMR (CDCl<sub>3</sub>, 125 MHz): δ = 43.8, 72.5, 118.8, 127.2, 128.5, 131.1, 133.9, 142.2. Optical Rotation: [α]<sup>27</sup><sub>D</sub> = -58 (c 1.0, CHCl<sub>3</sub>).<sup>3</sup> HPLC (Daicel Chiralpak IC, hexanes/2-propanol = 99:1, flow rate = 0.4 mL/min, λ = 220 nm) *t*<sub>major(S)</sub> = 28.9 min, *t*<sub>minor(R)</sub> = 26.0 min.

**(S)-1-(4-bromophenyl)but-3-en-1-ol (compound 2i):**<sup>8</sup> The product was isolated as a yellowish oil (yield 66 mg, 73%) after purification by silica gel chromatography (Hexane/EtOAc = 92:8). Reaction time = 12 h. <sup>1</sup>H NMR (CDCl<sub>3</sub>, 500 MHz): δ = 2.02-2.03 (br, 1H), 2.42-2.51 (m, 2H), 4.68-4.71 (dd, *J* = 2.5, 5 Hz, 1H), 5.13-5.16 (m, 2H), 5.72-5.80 (m, 1H), 7.21-7.24 (m, 2H), 7.45-7.46 (d, *J* = 8.5 Hz, 2H). <sup>13</sup>C NMR (CDCl<sub>3</sub>, 125 MHz): δ = 45.2, 73.9, 120.3, 128.9, 132.9, 135.3, 144.2. Optical Rotation: [α]<sup>27</sup><sub>D</sub> = -18 (c 3.0, C<sub>6</sub>H<sub>6</sub>).<sup>8</sup> HPLC (Daicel Chiralpak IA, hexanes/2-propanol = 99:1, flow rate = 0.5 mL/min, λ = 230 nm) *t*<sub>major(S)</sub> = 44.5 min, *t*<sub>minor(R)</sub> = 42.3 min.

**(S)-1-(3-methoxyphenyl)but-3-en-1-ol (compound 2j):**<sup>7,9</sup> The product was isolated as a sight yellowish oil (yield 53.5 mg, 75%) after purification by silica gel chromatography (Hexane/EtOAc = 94:6). Reaction time = 14 h. <sup>1</sup>H NMR (CDCl<sub>3</sub>, 500 MHz):  $\delta$  = 2.02 (d,  $J$  = 3 Hz, 1H), 2.44-2.54 (m, 2H), 3.80 (s, 3H), 4.7-4.72 (m, 1H), 5.12-5.17 (m, 2H), 5.75-5.84 (m, 1H), 6.79-6.81 (dd,  $J$  = 2.5, 5.5 Hz, 1H), 6.91-6.92 (m, 2H), 7.23-7.26 (m, 1H). <sup>13</sup>C NMR (CDCl<sub>3</sub>, 125 MHz):  $\delta$  = 45.2, 56.6, 74.6, 112.7, 114.4, 119.5, 119.8, 130.8, 135.8, 147, 161.1. Optical Rotation:  $[\alpha]_{\text{D}}^{27} = -44.2$  (c 0.88, C<sub>6</sub>H<sub>6</sub>).<sup>7</sup> HPLC (Daicel Chiralpak IA, hexanes/2-propanol = 98:2, flow rate = 0.6 mL/min,  $\lambda$  = 220 nm)  $t_{\text{major}}(S) = 25.3$  min,  $t_{\text{minor}}(R) = 24.3$  min.

**(S)-1-(*m*-tolyl)but-3-en-1-ol (compound 2k):**<sup>10</sup> The product was isolated as a colorless oil (yield 40 mg, 65%) after purification by silica gel chromatography (Hexane/EtOAc = 95:5). Reaction time = 16 h. <sup>1</sup>H NMR (CDCl<sub>3</sub>, 500 MHz):  $\delta$  = 2.05 (br, 1H), 2.35 (s, 3H), 2.46-2.53 (m, 2H), 4.67-4.71 (m, 1H), 5.13-5.18 (m, 2H), 5.77-5.85 (m, 1H), 7.08-7.09 (d,  $J$  = 7.5 Hz, 1H), 7.13-7.17 (m, 2H), 7.22-7.25 (t,  $J$  = 7.5 Hz, 1H). <sup>13</sup>C NMR (CDCl<sub>3</sub>, 125 MHz):  $\delta$  = 21.7, 44, 73.5, 118.5, 123.1, 126.7 128.5, 134.8, 138.3, 144. Optical Rotation:  $[\alpha]_{\text{D}}^{27} = -44.3$  (c 1.1, CHCl<sub>3</sub>).<sup>7</sup> HPLC (Daicel Chiralcel OD-H, hexanes/2-propanol = 98:2, flow rate = 0.4 mL/min,  $\lambda$  = 220 nm)  $t_{\text{major}}(S) = 31.6$  min,  $t_{\text{minor}}(R) = 26.7$  min.

**(S)-1-(2-methoxyphenyl)but-3-en-1-ol (compound 2l):**<sup>2</sup> The product was isolated as a colorless oil (yield 57 mg, 80%) after purification by silica gel chromatography (Hexane/EtOAc = 95:5). Reaction time = 14 h. <sup>1</sup>H NMR (CDCl<sub>3</sub>, 500 MHz):  $\delta$  = 2.47-2.61 (m, 3H), 3.84 (s, 3H), 4.94-4.97 (td,  $J$  = 5.5, 7.5 Hz, 1H), 5.09-5.15 (m, 2H), 5.8-5.89 (m, 1H), 6.87-6.88 (d,  $J$  = 8 Hz, 1H), 6.94-6.97 (t,  $J$  = 7.5 Hz, 1H), 7.22-7.26 (m, 1H), 7.32-7.34 (m, 1H). <sup>13</sup>C NMR (CDCl<sub>3</sub>, 125 MHz):  $\delta$  = 41.8, 55.2, 69.6, 110.4, 117.5, 120.6, 126.8, 128.3, 131.7, 135.2, 156.3. Optical Rotation:  $[\alpha]_{\text{D}}^{27} = -39.5$  (c 1.1, C<sub>6</sub>H<sub>6</sub>).<sup>5</sup> HPLC (Daicel

Chiralcel OD-H, hexanes/2-propanol = 96:4, flow rate = 0.6 mL/min,  $\lambda = 230$  nm)  $t_{\text{major}}(S) = 14.4$  min,  $t_{\text{minor}}(R) = 15.7$  min.

**(S)-1-(*o*-tolyl)but-3-en-1-ol (compound 2m):**<sup>7,11</sup> The product was isolated as a colorless oil (yield 35 mg, 55%) after purification by silica gel chromatography (Hexane/EtOAc = 95:5). Reaction time = 16 h. <sup>1</sup>H NMR (CDCl<sub>3</sub>, 500 MHz):  $\delta = 2.03$  (br, 1H), 2.33 (s, 3H), 2.39-2.52 (m, 2H), 4.95-4.98 (q,  $J = 4$  Hz, 1H), 5.14-5.19 (m, 2H), 5.81-5.89 (m, 1H), 7.12-7.13 (d,  $J = 7$  Hz, 1H), 7.15-7.18 (t,  $J = 7.5$  Hz, 1H), 7.21-7.24 (m, 1H), 7.47-7.48 (d,  $J = 7.5$  Hz, 1H). <sup>13</sup>C NMR (CDCl<sub>3</sub>, 125 MHz):  $\delta = 19, 42.6, 69.6, 118.2, 125.1, 126.2, 127.2, 130.3, 134.3, 134.7, 141.9$ . Optical Rotation:  $[\alpha]_{\text{D}}^{27} = -48.4$  (c 1, C<sub>6</sub>H<sub>6</sub>).<sup>7</sup> HPLC (Daicel Chiralcel OD-H, hexanes/2-propanol = 99:1, flow rate = 0.5 mL/min,  $\lambda = 220$  nm)  $t_{\text{major}}(S) = 35.4$  min,  $t_{\text{minor}}(R) = 32.2$  min.

**(S)-1-(2-fluorophenyl)but-3-en-1-ol (compound 2n):**<sup>8</sup> The product was isolated as a colorless oil (yield 45 mg, 68%) after purification by silica gel chromatography (Hexane/EtOAc = 96:4). Reaction time = 16 h. <sup>1</sup>H NMR (CDCl<sub>3</sub>, 200 MHz):  $\delta = 2.16$ -2.17 (d,  $J = 4$  Hz, 1H), 2.45-2.61 (m, 2H), 5.04-5.07 (m, 1H), 5.14-5.18 (m, 2H), 5.78-5.85 (m, 1H), 7.00-7.03 (m, 1H), 7.13-7.16 (d,  $J = 7.5$  Hz, 1H), 7.22-7.26 (m, 1H), 7.46-7.49 (m, 1H). <sup>13</sup>C NMR (CDCl<sub>3</sub>, 50 MHz):  $\delta = 42.5, 67.2, 115, 115.4, 118.6, 124.1, 124.2, 127.1, 127.2, 128.7, 128.9, 130.6, 134, 157.2$ . Optical Rotation:  $[\alpha]_{\text{D}}^{27} = -38.2$  (c 1.5, CHCl<sub>3</sub>).<sup>8</sup> HPLC (Daicel Chiralpak AS-H, hexanes/2-propanol = 99.5:0.5, flow rate = 0.5 mL/min,  $\lambda = 220$  nm)  $t_{\text{major}}(S) = 34.6$  min,  $t_{\text{minor}}(R) = 32.7$  min.

**(S)-1-(naphthalen-1-yl)but-3-en-1-ol (compound 2o):**<sup>2</sup> The product was isolated as a colourless oil (yield 71 mg, 90%) after purification by silica gel chromatography (Hexane/EtOAc = 94:6). Reaction time = 8 h. <sup>1</sup>H NMR (CDCl<sub>3</sub>, 500 MHz):  $\delta = 2.21$  (d,  $J = 3$  Hz, 1H), 2.56-2.62 (m, 1H), 2.73-2.78 (m, 1H), 5.16-5.22 (m, 2H), 5.5-5.53 (m, 1H), 5.87-5.96 (m, 1H), 7.45-7.52 (m, 3H), 7.64-7.66 (d,  $J = 7$  Hz, 1H), 7.76-7.78 (d,  $J = 8$  Hz, 1H),

7.86-7.87 (d,  $J = 8$  Hz, 1H), 8.05-8.07 (d,  $J = 8.5$  Hz, 1H).  $^{13}\text{C}$  NMR ( $\text{CDCl}_3$ , 125 MHz):  $\delta = 44.3, 71.4, 119.7, 124.2, 124.2, 126.9, 127.4, 129.4, 130.4, 135.2, 136.2, 140.8$ . Optical Rotation:  $[\alpha]_{\text{D}}^{27} = -62.5$  (c 1.1,  $\text{CHCl}_3$ ).<sup>3</sup> HPLC (Daicel Chiralpak IA, hexanes/2-propanol = 95:5, flow rate = 0.6 mL/min,  $\lambda = 220$  nm)  $t_{\text{major}}(S) = 16.7$  min,  $t_{\text{minor}}(R) = 19.1$  min.

**(S)-1-(naphthalen-2-yl)but-3-en-1-ol (compound 2p):**<sup>2</sup> The product was isolated as a pale yellow oil (yield 67 mg, 85%) after purification by silica gel chromatography (Hexane/EtOAc = 90:10). Reaction time = 9 h.  $^1\text{H}$  NMR ( $\text{CDCl}_3$ , 500 MHz):  $\delta = 2.14$ -2.15 (d,  $J = 3.5$  Hz, 1H), 2.55-2.65 (m, 2H), 4.9-4.93 (m, 1H), 5.14-5.21 (m, 2H), 5.79-5.87 (m, 1H), 7.44-7.49 (m, 3H), 7.81-7.84 (m, 4H).  $^{13}\text{C}$  NMR ( $\text{CDCl}_3$ , 125 MHz):  $\delta = 45.1, 74.8, 120, 125.4, 125.9, 127.2, 127.5, 129.1, 129.3, 129.6, 135.7, 142.6$ . Optical Rotation:  $[\alpha]_{\text{D}}^{27} = -48$  (c 1,  $\text{CHCl}_3$ ).<sup>3</sup> HPLC (Daicel Chiralpak IA, hexanes/2-propanol = 90:10, flow rate = 0.5 mL/min,  $\lambda = 220$  nm)  $t_{\text{major}}(S) = 16.3$  min,  $t_{\text{minor}}(R) = 15.3$  min.

**(S)-1-(thiophen-2-yl)but-3-en-1-ol (compound 2q):**<sup>2</sup> The product was isolated as a yellowish oil (yield 49 mg, 80%) after purification by silica gel chromatography (Hexane/EtOAc = 94:6). Reaction time = 10 h.  $^1\text{H}$  NMR ( $\text{CDCl}_3$ , 500 MHz):  $\delta = 2.19$ -2.2 (d,  $J = 4$  Hz, 1H), 2.6-2.64 (m, 2H), 4.97-5.01 (m, 1H), 5.15-5.21 (m, 2H), 5.79-5.87 (m, 1H), 6.96-6.98 (m, 2H), 7.24-7.25 (m, 1H).  $^{13}\text{C}$  NMR ( $\text{CDCl}_3$ , 125 MHz):  $\delta = 45.2, 70.8, 120.2, 125.1, 126, 128, 135.2$ . HPLC (Daicel Chiralcel OD-H, hexanes/2-propanol = 97:3, flow rate = 0.6 mL/min,  $\lambda = 220$  nm)  $t_{\text{major}}(S) = 18.7$  min,  $t_{\text{minor}}(R) = 17.1$  min.

**(1E,3R)-1-Phenyl-1,5-hexadiene-3-ol (compound 2r):**<sup>3</sup> The product was isolated as a yellow oil (yield 56.5 mg, 82%) after purification by silica gel chromatography (Hexane/EtOAc = 90:10). Reaction time = 10 h.  $^1\text{H}$  NMR ( $\text{CDCl}_3$ , 500 MHz):  $\delta = 1.84$  (br, 1H), 2.35-2.47 (m, 2H), 4.34-4.38 (m, 1H), 5.15-5.2 (m, 2H), 5.81-5.90 (m, 1H), 6.22-6.26 (dd,  $J = 6, 10$  Hz, 1H), 6.59-6.62 (d,  $J = 15.5$  Hz, 1H), 7.22-7.25 (m, 1H), 7.3-7.33 (t,  $J = 8$  Hz, 2H), 7.37-7.39 (d,  $J = 7$  Hz, 1H).  $^{13}\text{C}$  NMR ( $\text{CDCl}_3$ , 125 MHz):  $\delta = 41.5, 71.2, 118,$



125.9, 127.1, 128, 129.8, 131, 133.5, 136.1. Optical Rotation:  $[\alpha]_{\text{D}}^{27} = +29$  (c 1,  $\text{CHCl}_3$ ).<sup>3</sup>  
HPLC (Daicel Chiralpak IA, hexanes/2-propanol = 95:5, flow rate = 0.7 mL/min,  $\lambda = 254$   
nm)  $t_{\text{major}}(R) = 14.6$  min,  $t_{\text{minor}}(S) = 13.6$  min.

**(1E,3R)-2-Methyl-1-phenyl-1,5-hexadiene-3-ol (compound 2s):**<sup>3</sup> The product was isolated  
as a yellow oil (yield 65 mg, 87%) after purification by silica gel chromatography  
(Hexane/EtOAc = 90:10). Reaction time = 10 h. <sup>1</sup>H NMR ( $\text{CDCl}_3$ , 200 MHz):  $\delta = 1.82$ - $1.84$   
(m, 1H), 1.88 (s, 3H), 2.38- $2.43$  (m, 2H), 4.22 (m, 1H), 5.12- $5.22$  (m, 2H), 5.73- $5.90$  (m, 1H),  
6.52 (s, 1H), 7.21- $7.33$  (m, 5H). <sup>13</sup>C NMR ( $\text{CDCl}_3$ , 50 MHz):  $\delta = 13.1$ , 39.5, 76, 117.5, 125.2,  
125.9, 127.6, 128.4, 134, 137, 139. Optical Rotation:  $[\alpha]_{\text{D}}^{27} = +2.5$  (c 0.9,  $\text{CHCl}_3$ ).<sup>3</sup> HPLC  
(Daicel Chiralcel IC, hexanes/2-propanol = 95:5, flow rate = 0.8 mL/min,  $\lambda = 220$  nm)  
 $t_{\text{major}}(R) = 8.2$  min,  $t_{\text{minor}}(S) = 7.5$  min.

## HPLC chromatograms of the Homoallylic Alcohols

### (S)-1-phenylbut-3-en-1-ol (compound 2a)

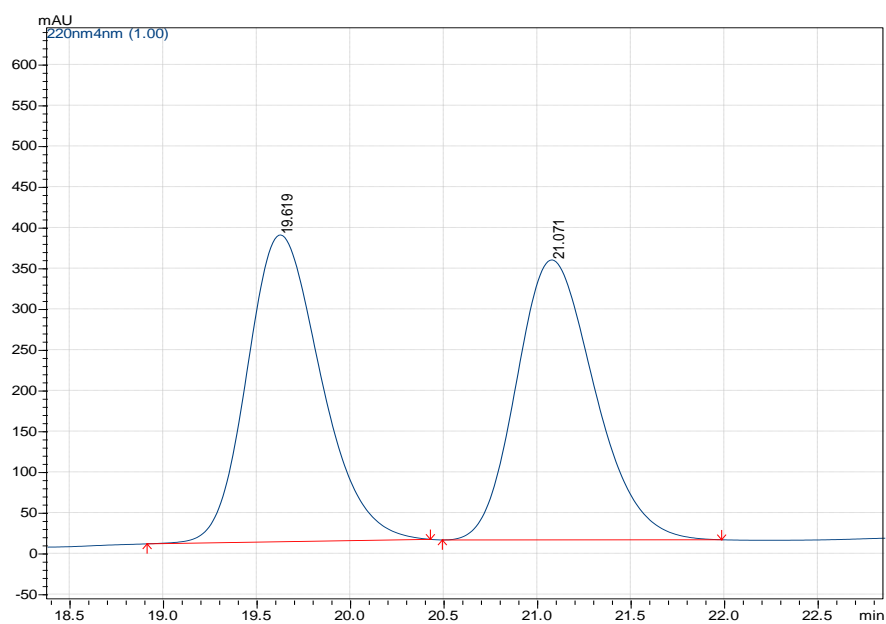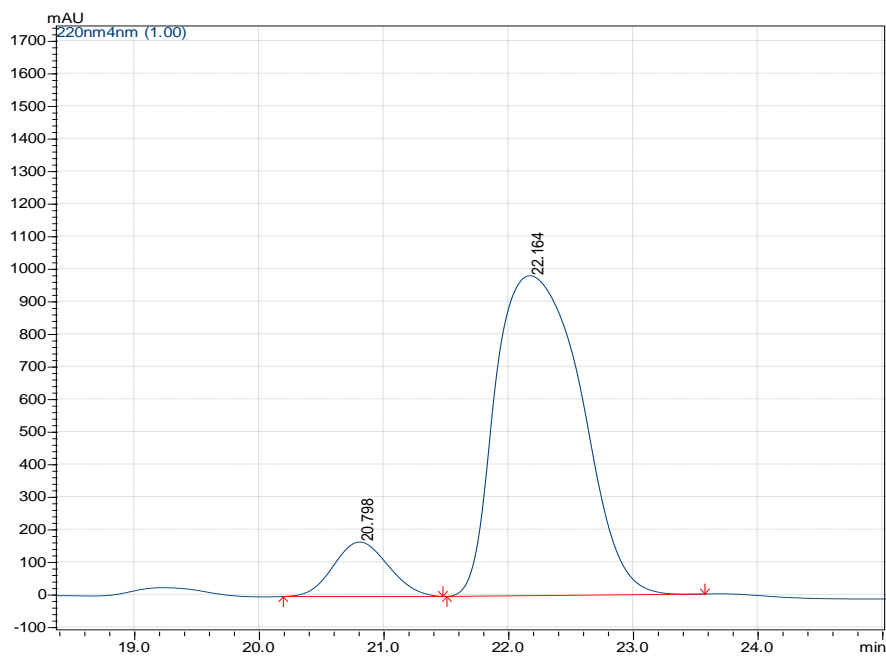

| Peak# | Ret. Time | Area     | Peak Start | Peak End | Area%   |
|-------|-----------|----------|------------|----------|---------|
| 1     | 19.619    | 10352714 | 18.912     | 20.427   | 50.8703 |
| 2     | 21.071    | 9998471  | 20.491     | 21.984   | 49.1297 |

| Peak# | Ret. Time | Area     | Peak Start | Peak End | Area%   |
|-------|-----------|----------|------------|----------|---------|
| 1     | 20.798    | 5115327  | 20.192     | 21.472   | 9.8360  |
| 2     | 22.164    | 46891066 | 21.504     | 23.573   | 90.1640 |

**(S)-1-(4-methoxyphenyl)but-3-en-1-ol (compound 2b)**

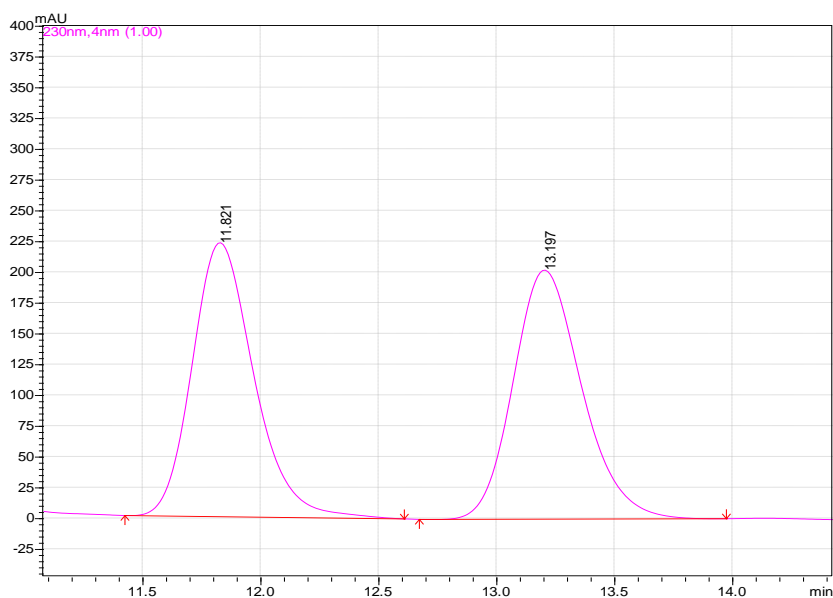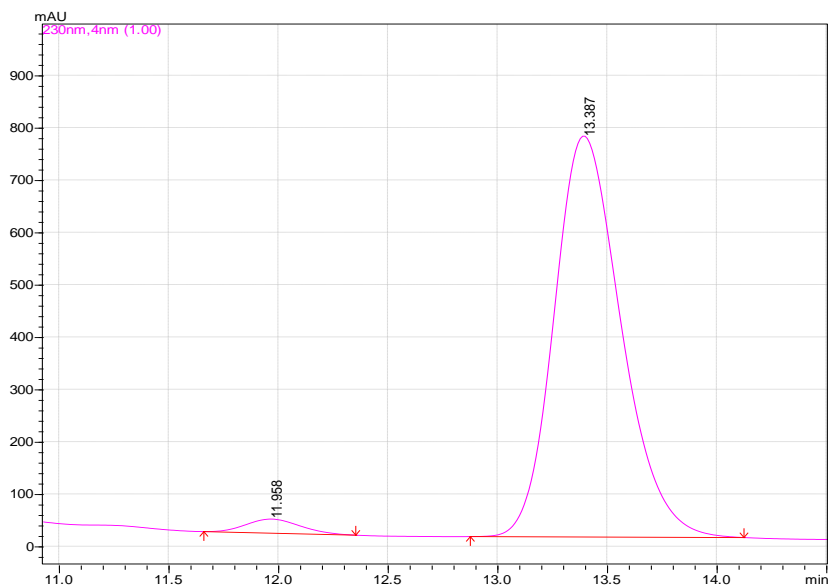

| Peak# | Ret. Time | Area    | Peak Start | Peak End | Area%   |
|-------|-----------|---------|------------|----------|---------|
| 1     | 11.821    | 4059344 | 11.424     | 12.608   | 49.8443 |
| 2     | 13.197    | 4084705 | 12.672     | 13.973   | 50.1557 |

| Peak# | Ret. Time | Area     | Peak Start | Peak End | Area%   |
|-------|-----------|----------|------------|----------|---------|
| 1     | 11.958    | 464430   | 11.659     | 12.352   | 2.7754  |
| 2     | 13.387    | 16269373 | 12.875     | 14.123   | 97.2246 |

**(4-benzyloxyphenyl)but-3-en-1-ol (compound 2c)**

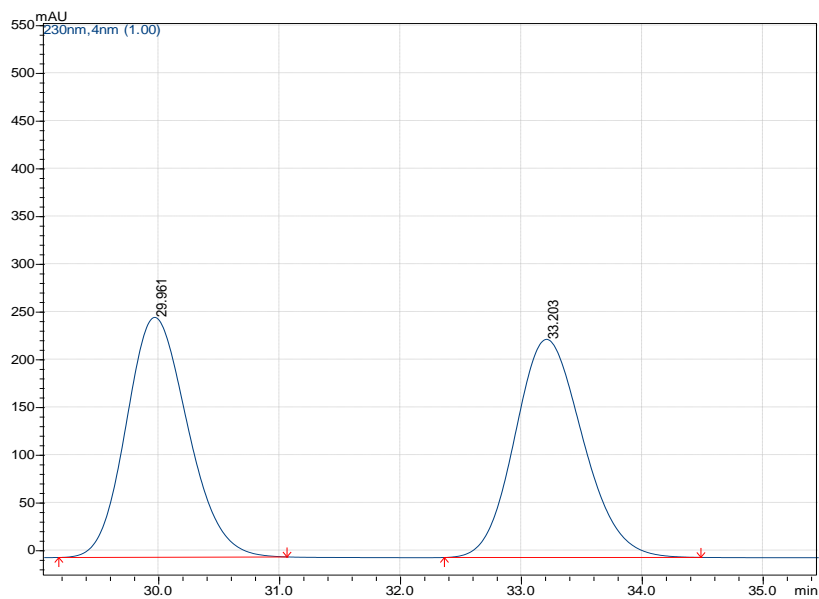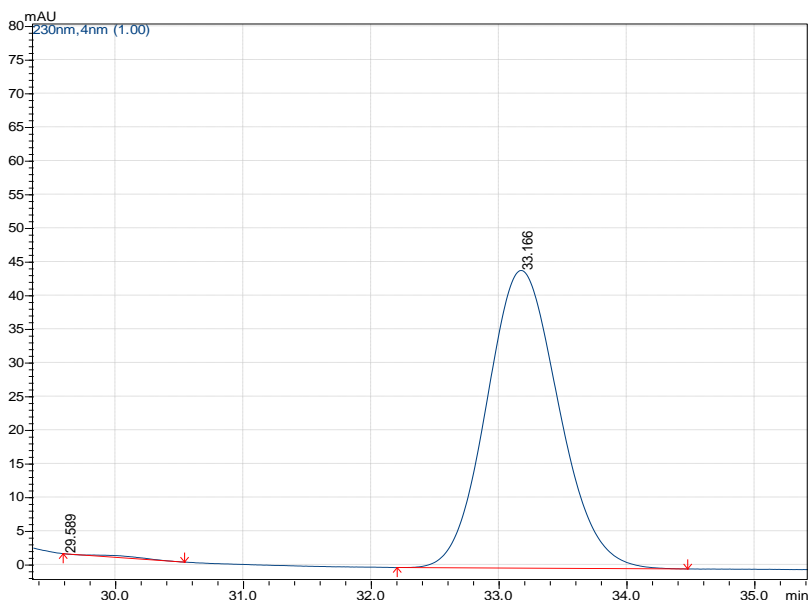

| Peak# | Ret. Time | Area    | Peak Start | Peak End | Area%   |
|-------|-----------|---------|------------|----------|---------|
| 1     | 29.961    | 8926091 | 29.152     | 31.200   | 49.9755 |
| 2     | 33.203    | 8934860 | 32.309     | 34.421   | 50.0245 |

| Peak# | Ret. Time | Area    | Peak Start | Peak End | Area%   |
|-------|-----------|---------|------------|----------|---------|
| 1     | 29.589    | 5542    | 29.589     | 30.539   | 0.3186  |
| 2     | 33.166    | 1733980 | 32.203     | 34.475   | 99.6814 |

**(S)-1-(4-*tert*-Butylphenyl)-3-buten-1-ol (compound 2d)**

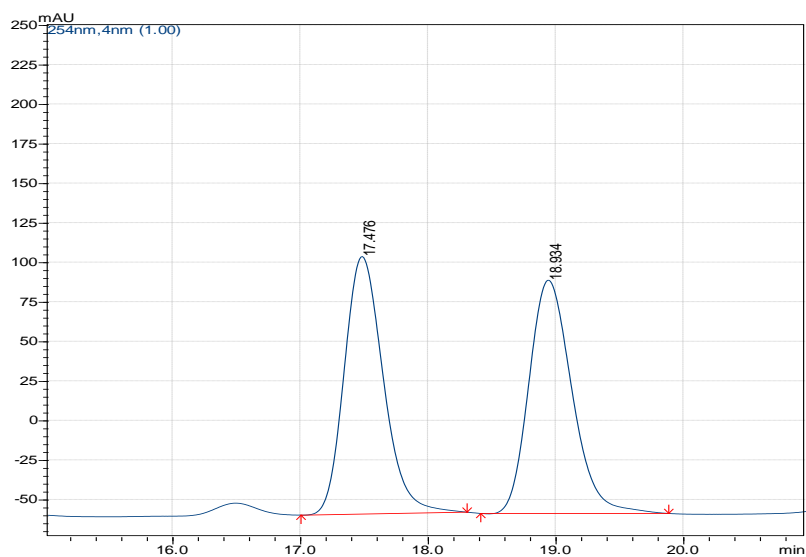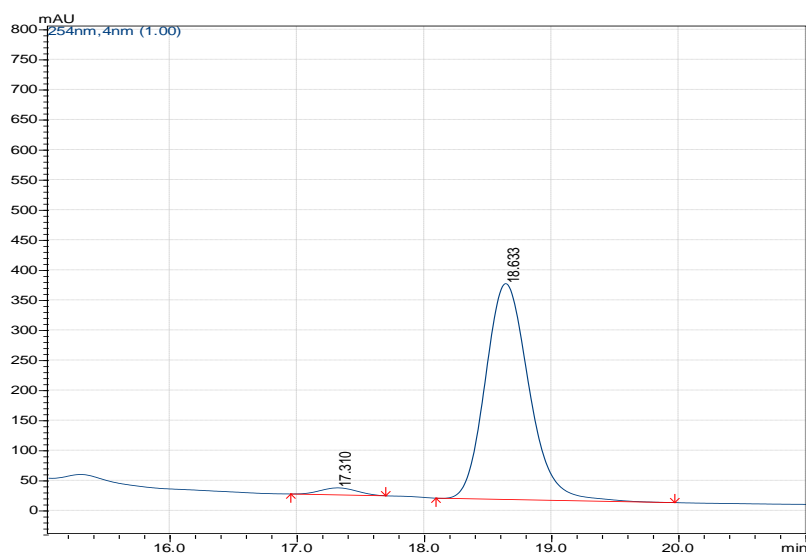

| Peak# | Ret. Time | Area    | Peak Start | Peak End | Area%   |
|-------|-----------|---------|------------|----------|---------|
| 1     | 17.476    | 3457839 | 17.003     | 18.304   | 50.0846 |
| 2     | 18.934    | 3446159 | 18.411     | 19.883   | 49.9154 |

| Peak# | Ret. Time | Area    | Peak Start | Peak End | Area%   |
|-------|-----------|---------|------------|----------|---------|
| 1     | 17.310    | 231851  | 16.949     | 17.696   | 2.6431  |
| 2     | 18.633    | 8540149 | 18.091     | 19.968   | 97.3569 |

**(S)-1-(*p*-tolyl)but-3-en-1-ol (compound 2e)**

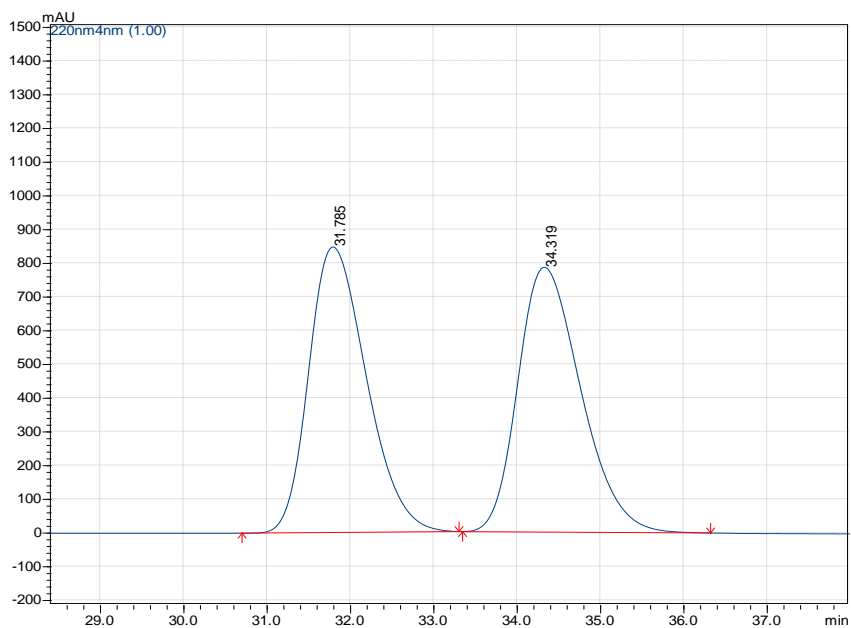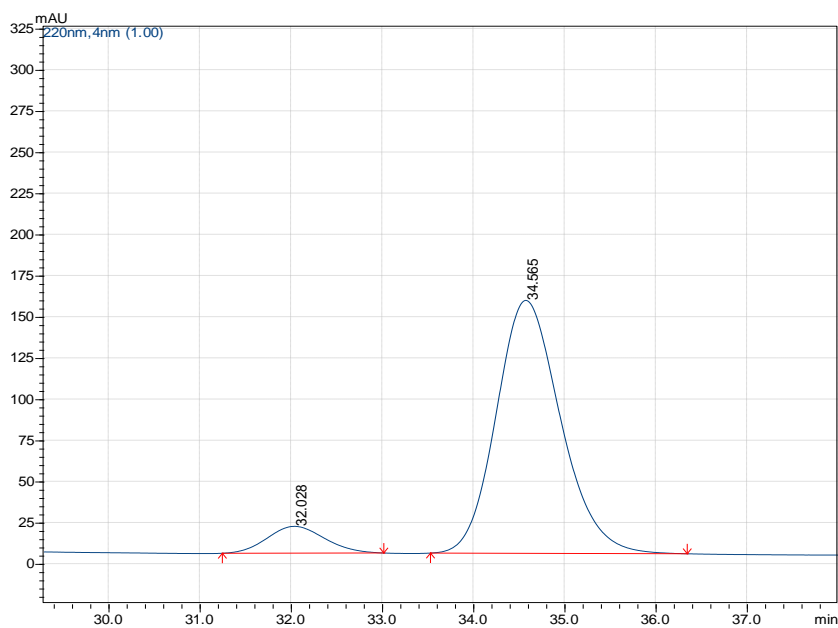

| Peak# | Ret. Time | Area     | Peak Start | Peak End | Area%   |
|-------|-----------|----------|------------|----------|---------|
| 1     | 31.785    | 40727300 | 30.699     | 33.301   | 49.7284 |
| 2     | 34.319    | 41172171 | 33.344     | 36.320   | 50.2716 |

| Peak# | Ret. Time | Area    | Peak Start | Peak End | Area%   |
|-------|-----------|---------|------------|----------|---------|
| 1     | 32.028    | 711150  | 31.243     | 33.013   | 8.6186  |
| 2     | 34.565    | 7540202 | 33.525     | 36.341   | 91.3814 |

**(S)-1-(4-nitrophenyl)but-3-en-1-ol (compound 2f)**

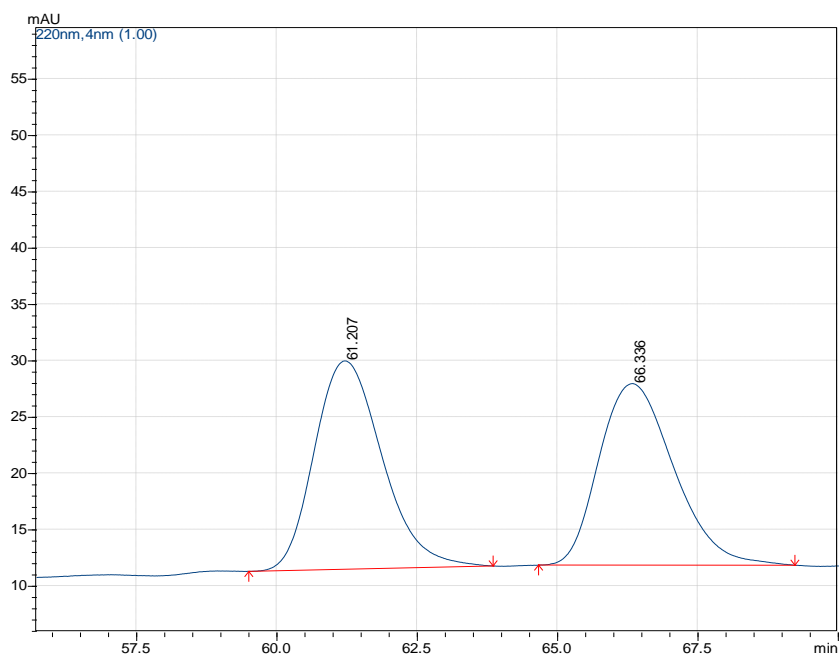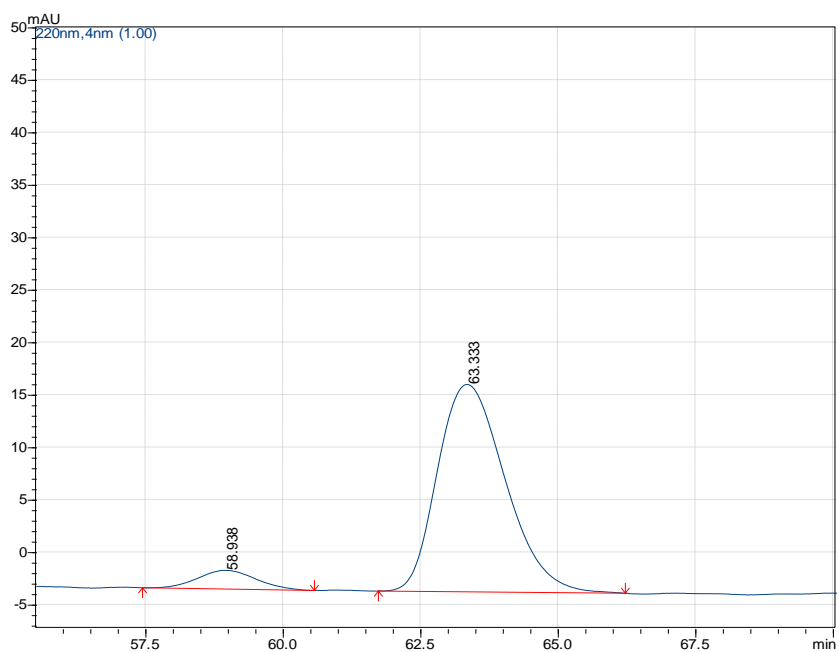

| Peak# | Ret. Time | Area    | Peak Start | Peak End | Area%   |
|-------|-----------|---------|------------|----------|---------|
| 1     | 61.207    | 1555059 | 59.499     | 63.851   | 51.0594 |
| 2     | 66.336    | 1490530 | 64.661     | 69.227   | 48.9406 |

| Peak# | Ret. Time | Area    | Peak Start | Peak End | Area%   |
|-------|-----------|---------|------------|----------|---------|
| 1     | 58.938    | 131687  | 57.440     | 60.565   | 7.2229  |
| 2     | 63.333    | 1691508 | 61.728     | 66.219   | 92.7771 |

**(S)-1-(4-fluorophenyl)but-3-en-1-ol (compound 2g)**

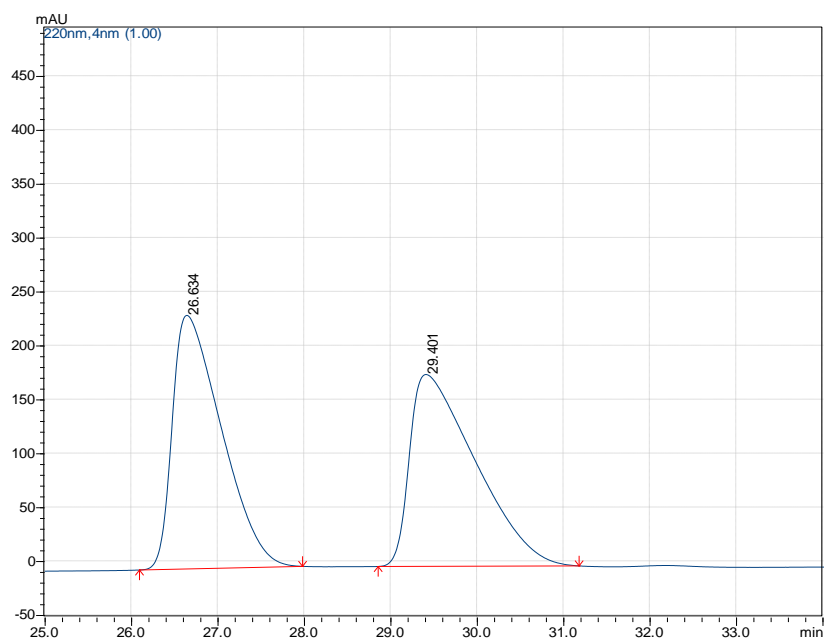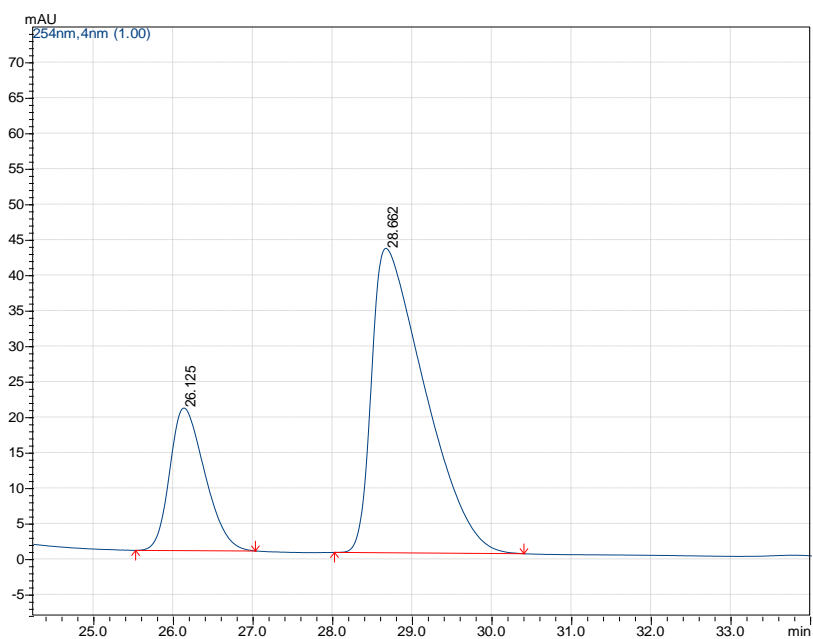

| Peak# | Ret. Time | Area    | Peak Start | Peak End | Area%   |
|-------|-----------|---------|------------|----------|---------|
| 1     | 26.634    | 9305374 | 26.091     | 27.979   | 49.7672 |
| 2     | 29.401    | 9392428 | 28.853     | 31.179   | 50.2328 |

| Peak# | Ret. Time | Area    | Peak Start | Peak End | Area%   |
|-------|-----------|---------|------------|----------|---------|
| 1     | 26.125    | 615645  | 25.525     | 27.029   | 23.5862 |
| 2     | 28.662    | 1994546 | 28.021     | 30.400   | 76.4138 |



**(S)-1-(4-chlorophenyl)but-3-en-1-ol (compound 2h)**

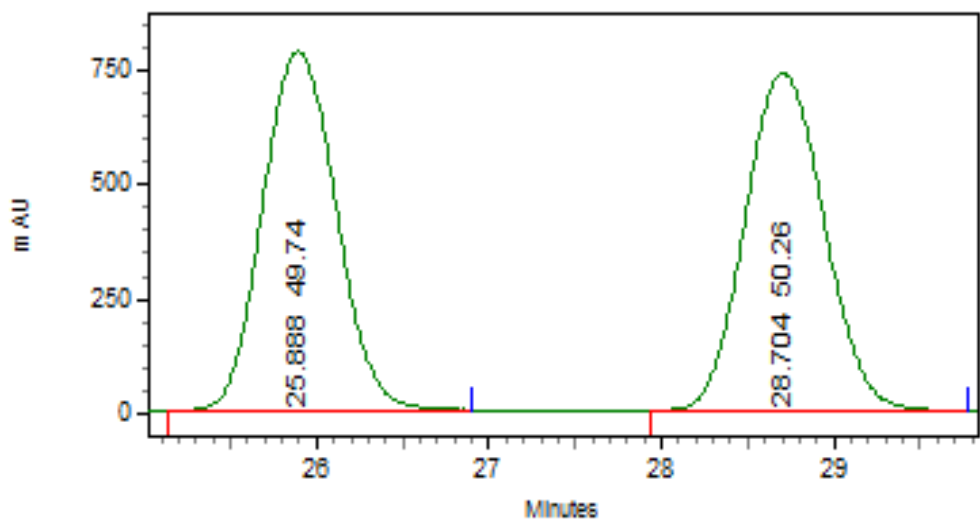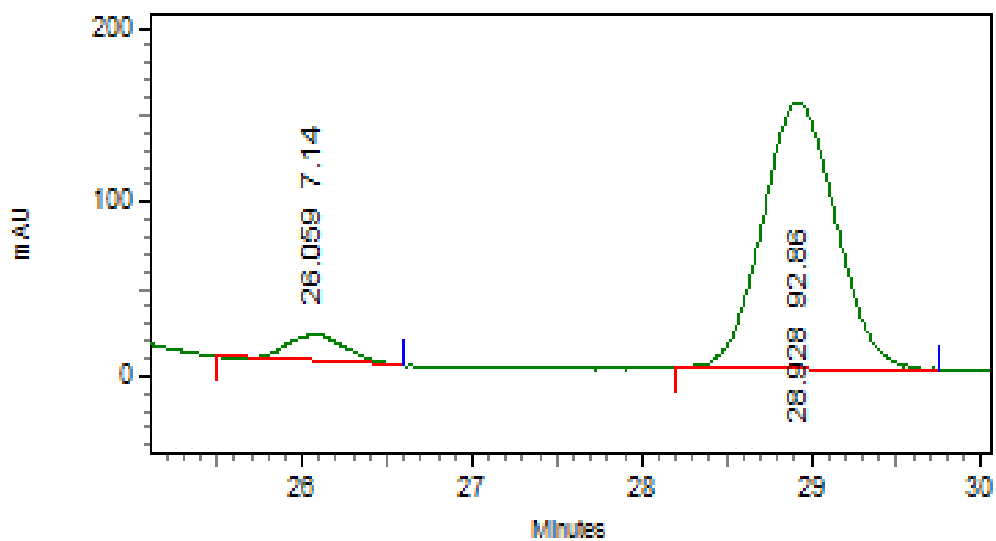

**(S)-1-(4-bromophenyl)but-3-en-1-ol (compound 2i)**

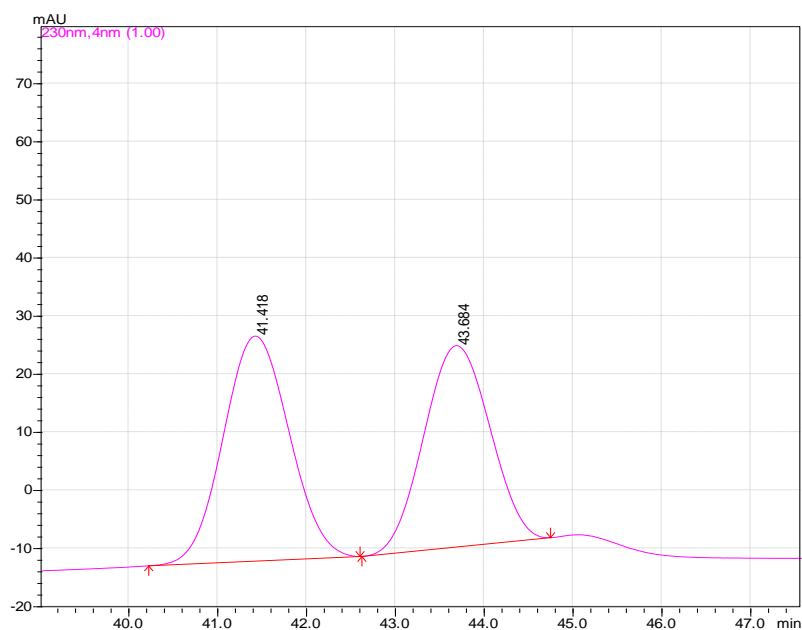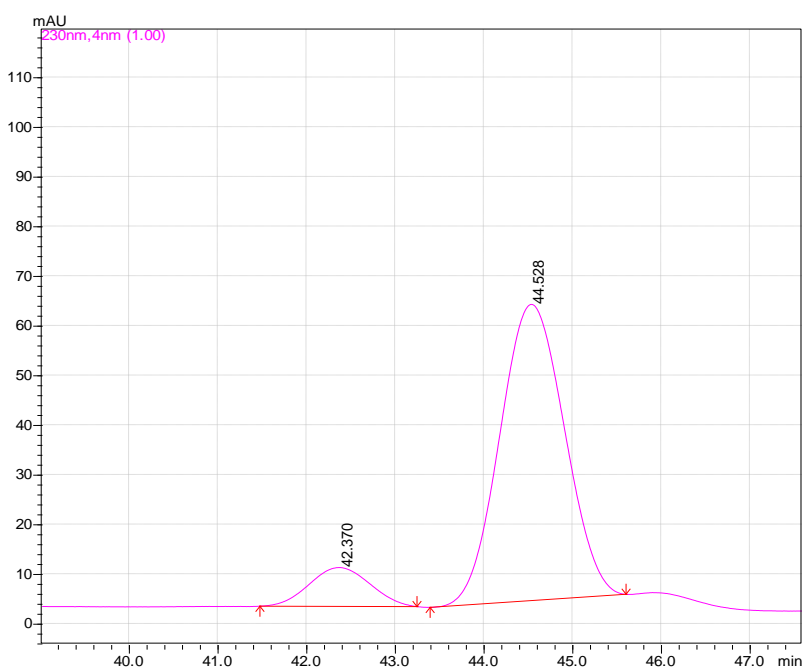

| Peak# | Ret. Time | Area    | Peak Start | Peak End | Area%   |
|-------|-----------|---------|------------|----------|---------|
| 1     | 41.418    | 1996744 | 40.224     | 42.603   | 52.7797 |
| 2     | 43.684    | 1786423 | 42.624     | 44.747   | 47.2203 |

| Peak# | Ret. Time | Area    | Peak Start | Peak End | Area%   |
|-------|-----------|---------|------------|----------|---------|
| 1     | 42.370    | 371295  | 41.472     | 43.243   | 10.9736 |
| 2     | 44.528    | 3012227 | 43.328     | 45.771   | 89.0264 |

**(S)-1-(3-methoxyphenyl)but-3-en-1-ol (compound 2j)**

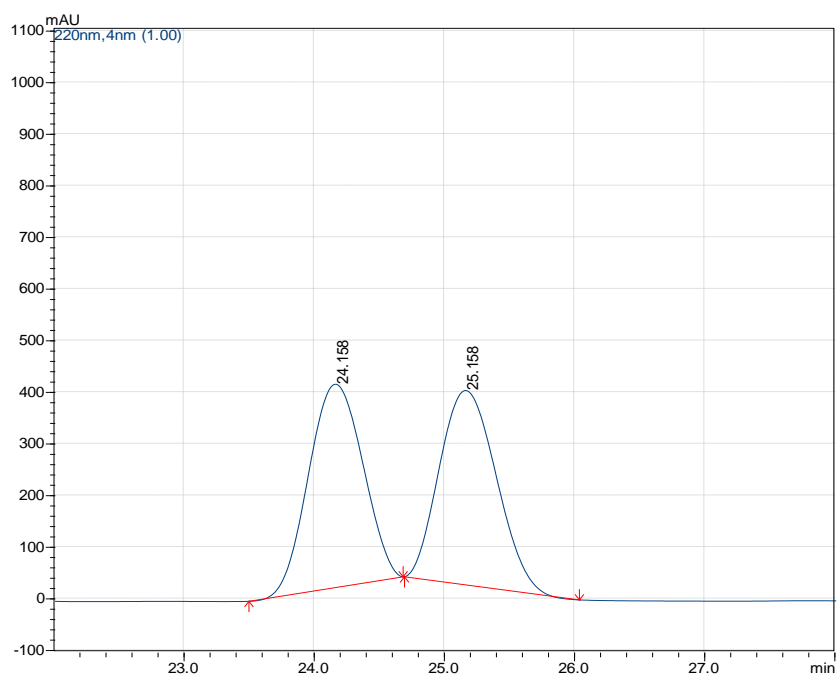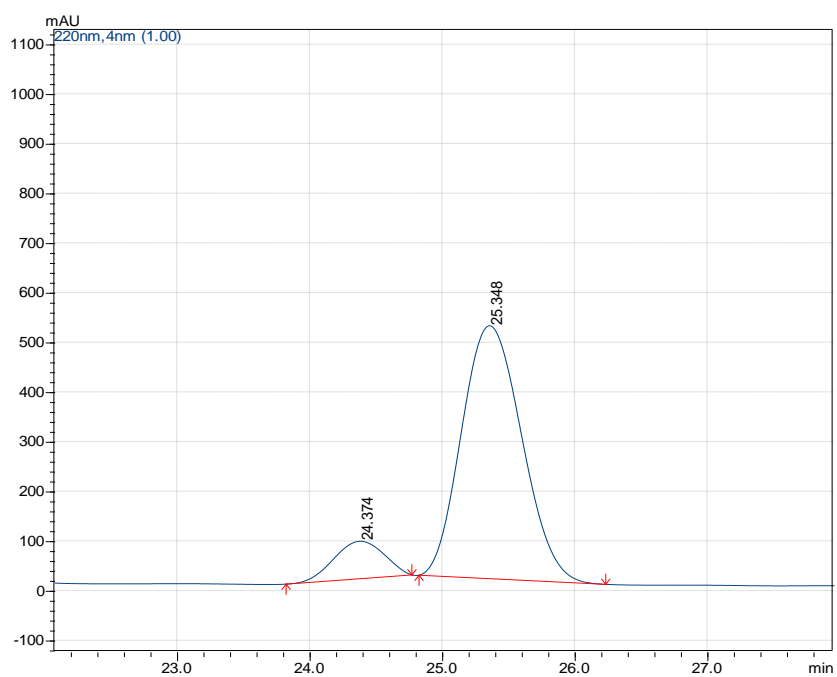

| Peak# | Ret. Time | Area     | Peak Start | Peak End | Area%   |
|-------|-----------|----------|------------|----------|---------|
| 1     | 24.158    | 11404118 | 23.499     | 24.683   | 49.9716 |
| 2     | 25.158    | 11417082 | 24.693     | 26.037   | 50.0284 |

| Peak# | Ret. Time | Area     | Peak Start | Peak End | Area%   |
|-------|-----------|----------|------------|----------|---------|
| 1     | 24.374    | 1991570  | 23.819     | 24.768   | 11.0335 |
| 2     | 25.348    | 16058634 | 24.821     | 26.229   | 88.9665 |

**(S)-1-(*m*-tolyl)but-3-en-1-ol (compound 2k)**

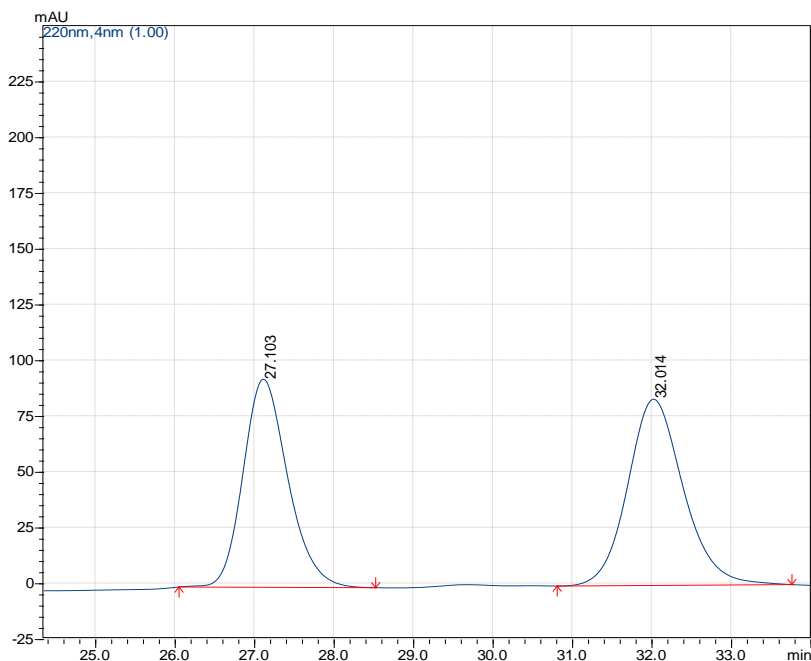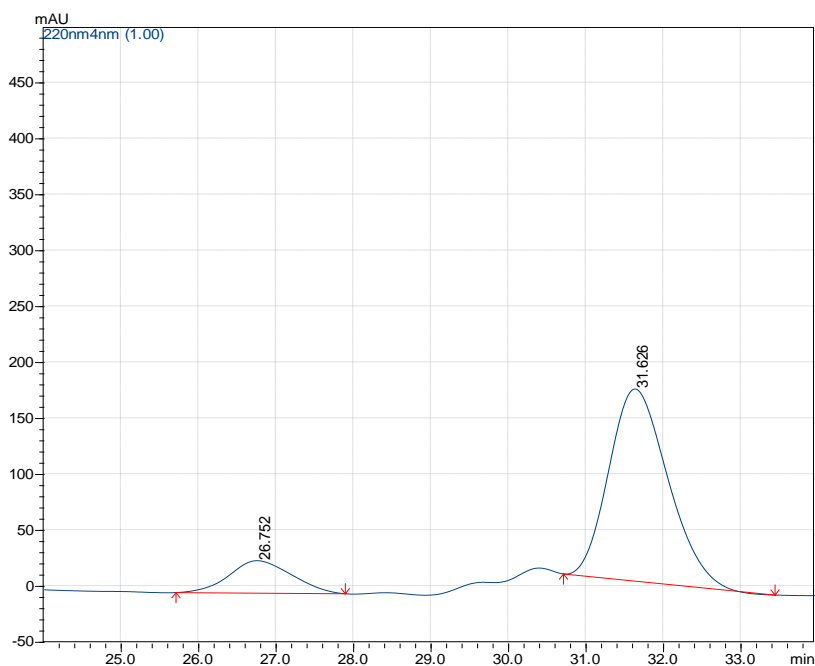

| Peak# | Ret. Time | Area    | Peak Start | Peak End | Area%   |
|-------|-----------|---------|------------|----------|---------|
| 1     | 27.103    | 3658696 | 26.048     | 28.523   | 47.3621 |
| 2     | 32.014    | 4066256 | 30.805     | 33.760   | 52.6379 |

| Peak# | Ret. Time | Area    | Peak Start | Peak End | Area%   |
|-------|-----------|---------|------------|----------|---------|
| 1     | 26.752    | 1631123 | 25.707     | 27.893   | 15.2056 |
| 2     | 31.626    | 9095995 | 30.709     | 33.440   | 84.7944 |

**(S)-1-(2-methoxyphenyl)but-3-en-1-ol (compound 2l)**

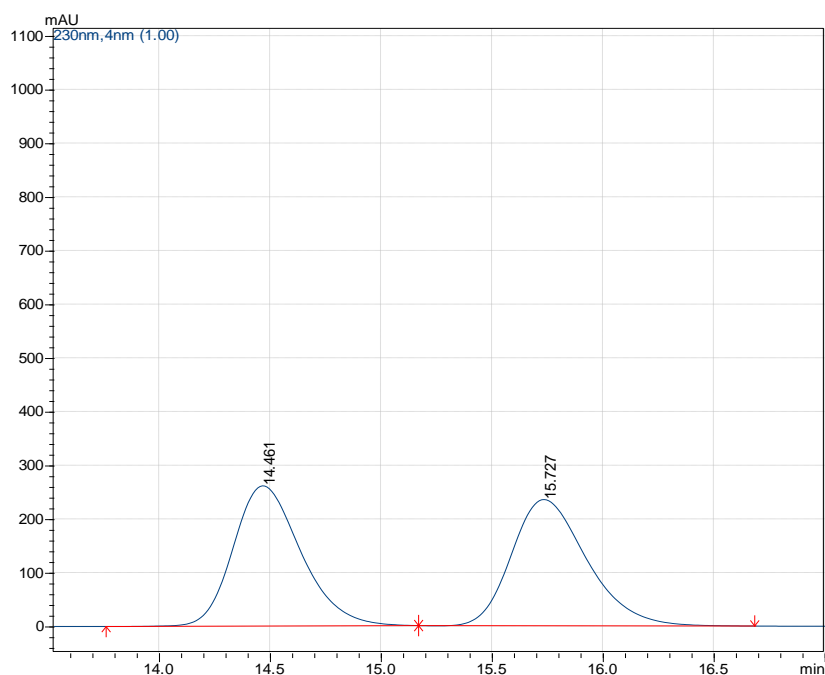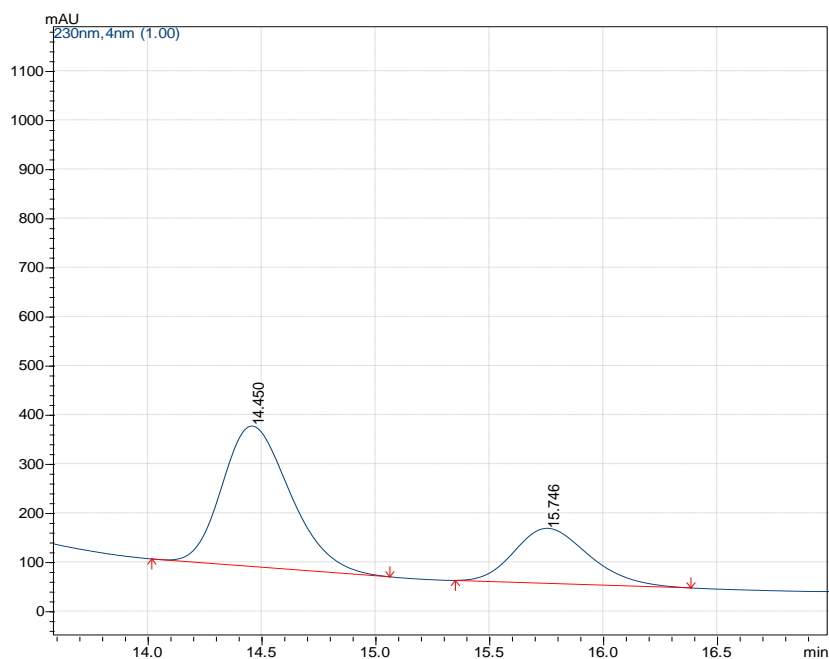

| Peak# | Ret. Time | Area     | Peak Start | Peak End | Area%   |
|-------|-----------|----------|------------|----------|---------|
| 1     | 14.461    | 19206379 | 13.760     | 15.168   | 50.0494 |
| 2     | 15.727    | 19168499 | 15.168     | 16.683   | 49.9506 |

| Peak# | Ret. Time | Area    | Peak Start | Peak End | Area%   |
|-------|-----------|---------|------------|----------|---------|
| 1     | 14.450    | 5940613 | 14.016     | 15.061   | 69.9479 |
| 2     | 15.746    | 2552294 | 15.349     | 16.384   | 30.0521 |

**(S)-1-(*o*-tolyl)but-3-en-1-ol (compound 2m)**

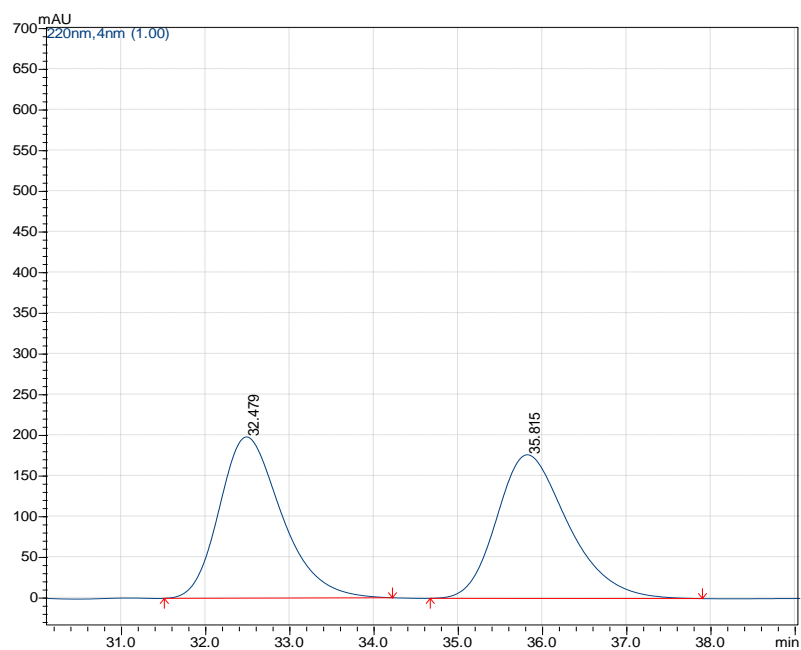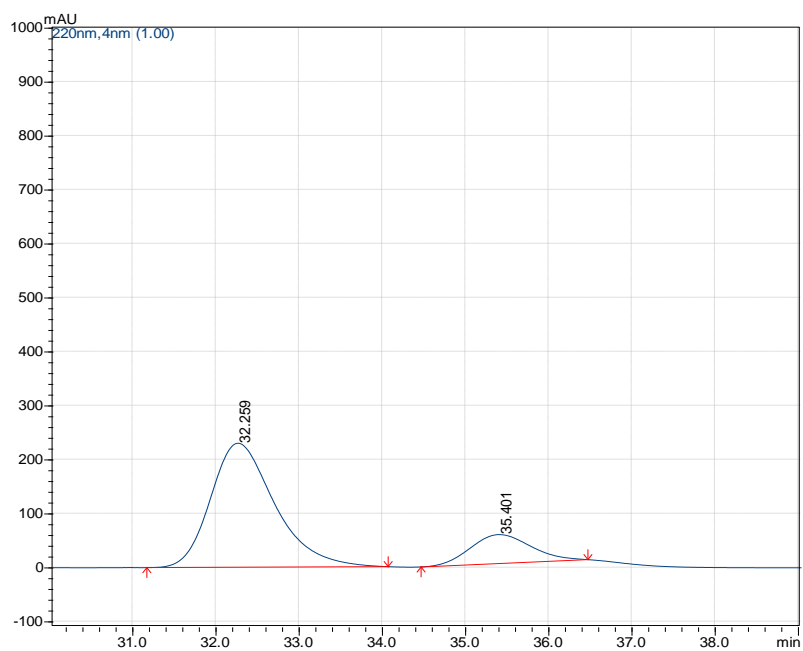

| Peak# | Ret. Time | Area     | Peak Start | Peak End | Area%   |
|-------|-----------|----------|------------|----------|---------|
| 1     | 32.479    | 10202178 | 31.509     | 34.219   | 49.4997 |
| 2     | 35.815    | 10408411 | 34.667     | 37.899   | 50.5003 |

| Peak# | Ret. Time | Area     | Peak Start | Peak End | Area%   |
|-------|-----------|----------|------------|----------|---------|
| 1     | 32.259    | 12324422 | 31.168     | 34.069   | 81.9234 |
| 2     | 35.401    | 2719420  | 34.464     | 36.469   | 18.0766 |

**(S)-1-(2-fluorophenyl)but-3-en-1-ol (compound 2n)**

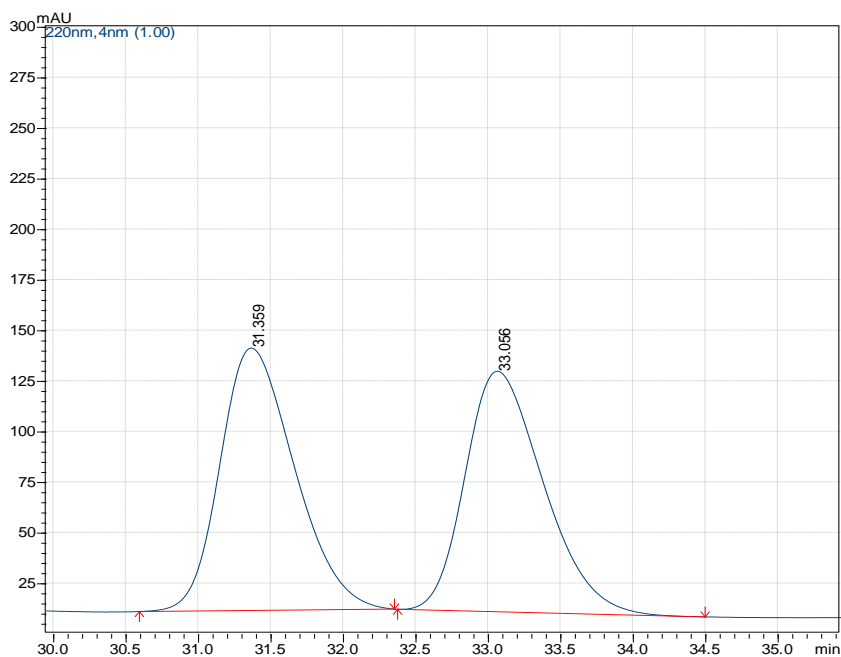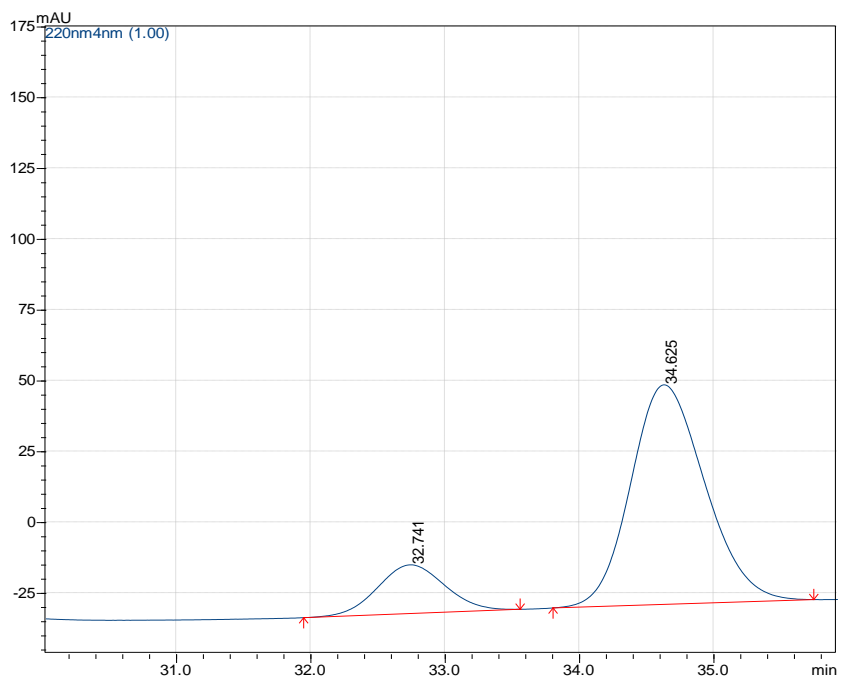

| Peak# | Ret. Time | Area    | Peak Start | Peak End | Area%   |
|-------|-----------|---------|------------|----------|---------|
| 1     | 31.359    | 4627708 | 30.592     | 32.352   | 50.9127 |
| 2     | 33.056    | 4461793 | 32.373     | 34.496   | 49.0873 |

| Peak# | Ret. Time | Area    | Peak Start | Peak End | Area%   |
|-------|-----------|---------|------------|----------|---------|
| 1     | 32.741    | 598991  | 31.947     | 33.557   | 16.7455 |
| 2     | 34.625    | 2978030 | 33.803     | 35.744   | 83.2545 |

**(S)-1-(naphthalen-1-yl)but-3-en-1-ol (compound 2o)**

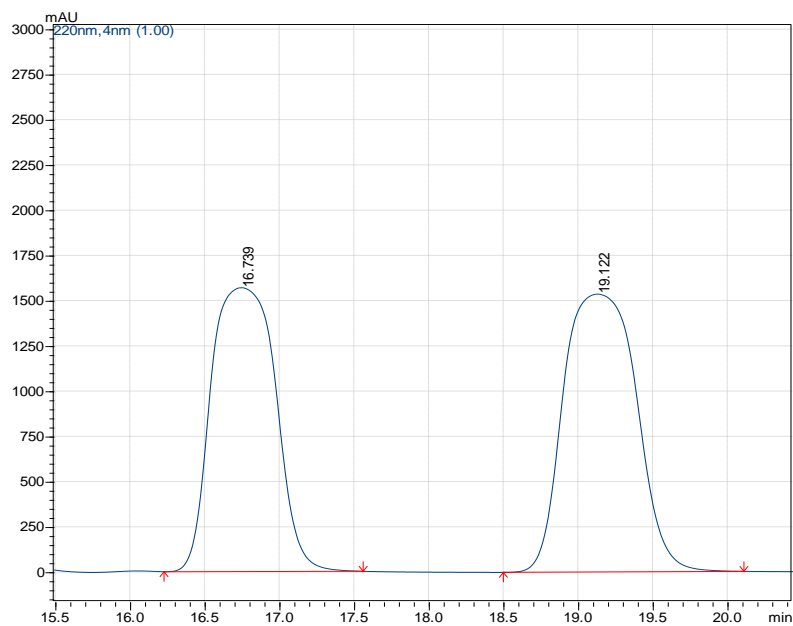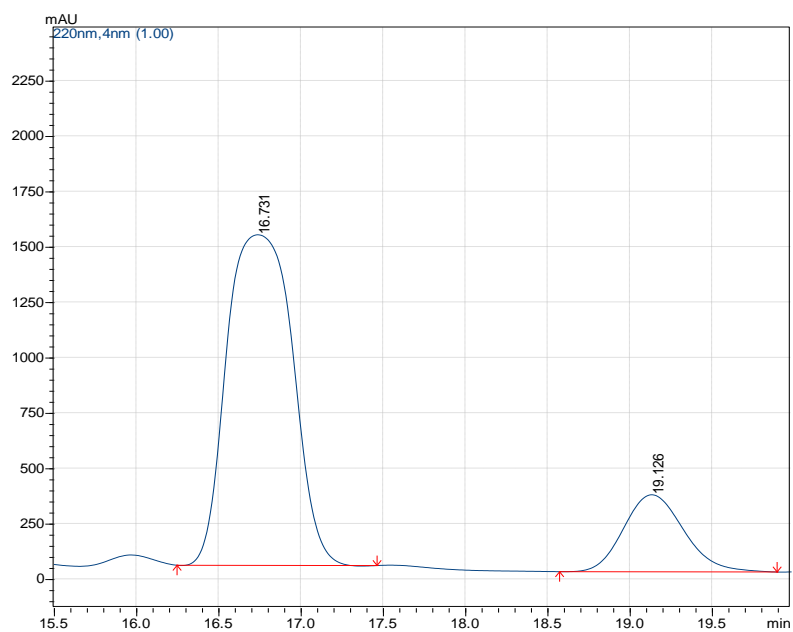

| Peak# | Ret. Time | Area     | Peak Start | Peak End | Area%   |
|-------|-----------|----------|------------|----------|---------|
| 1     | 16.739    | 47124829 | 16.224     | 17.557   | 47.4385 |
| 2     | 19.122    | 52214059 | 18.496     | 20.107   | 52.5615 |

| Peak# | Ret. Time | Area     | Peak Start | Peak End | Area%   |
|-------|-----------|----------|------------|----------|---------|
| 1     | 16.731    | 41661560 | 16.245     | 17.461   | 82.4916 |
| 2     | 19.126    | 8842468  | 18.571     | 19.893   | 17.5084 |



**(S)-1-(naphthalen-2-yl)but-3-en-1-ol (compound 2p)**

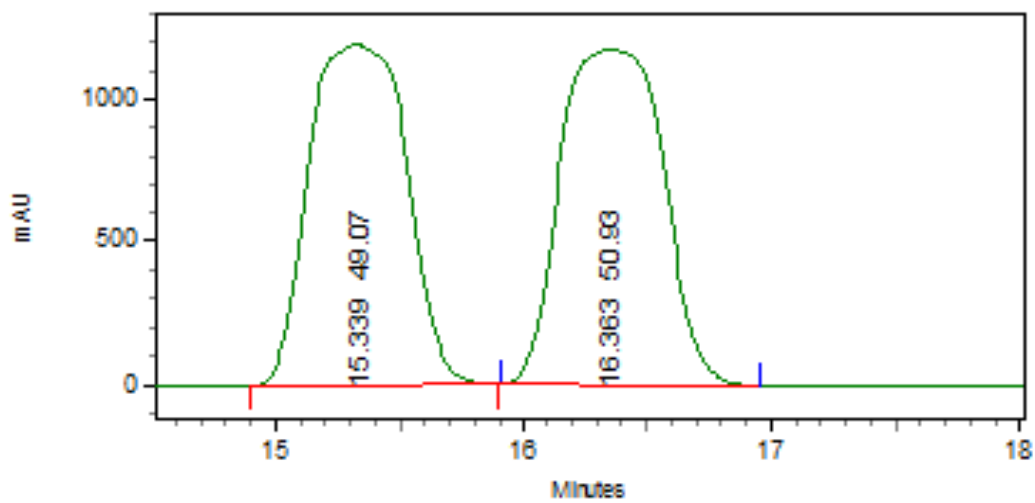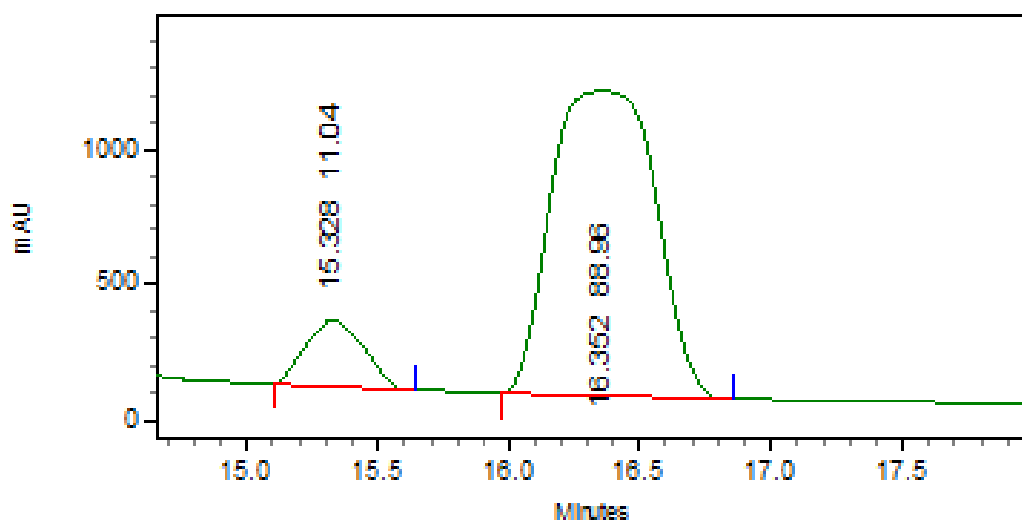

**(S)-1-(thiophen-2-yl)but-3-en-1-ol (compound 2q)**

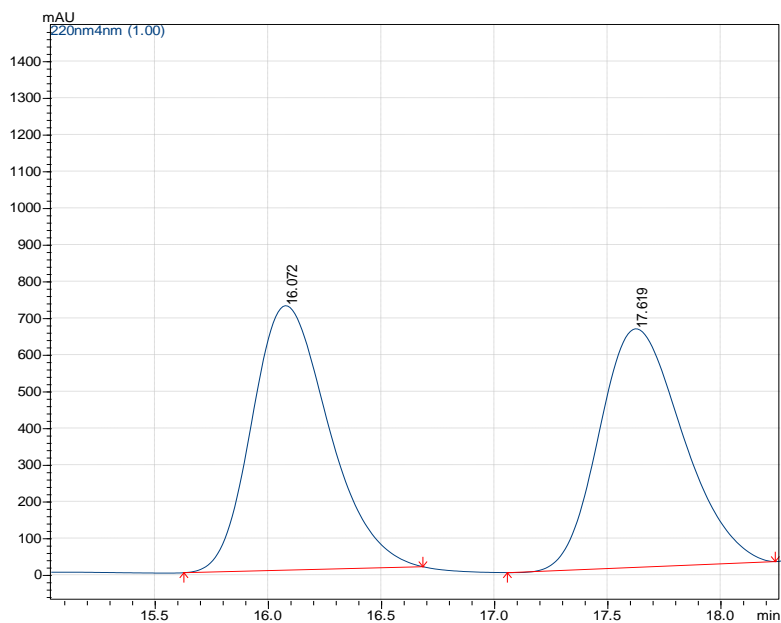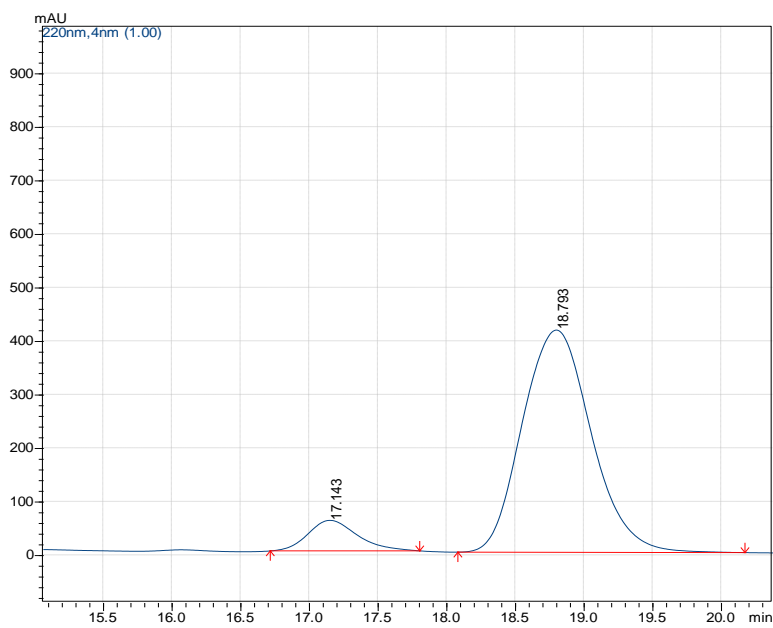

| Peak# | Ret. Time | Area     | Peak Start | Peak End | Area%   |
|-------|-----------|----------|------------|----------|---------|
| 1     | 16.072    | 17061150 | 15.627     | 16.683   | 50.5413 |
| 2     | 17.619    | 16695718 | 17.056     | 18.240   | 49.4587 |

| Peak# | Ret. Time | Area     | Peak Start | Peak End | Area%   |
|-------|-----------|----------|------------|----------|---------|
| 1     | 17.143    | 1426400  | 16.715     | 17.803   | 8.9628  |
| 2     | 18.793    | 14488260 | 18.080     | 20.171   | 91.0372 |

**(1*E*,3*R*)-1-Phenyl-1,5-hexadiene-3-ol (compound 2r)**

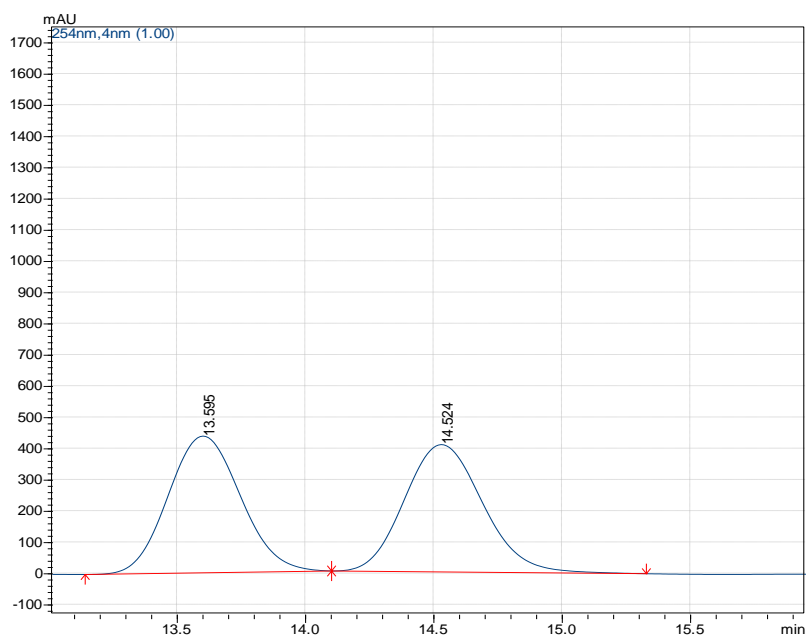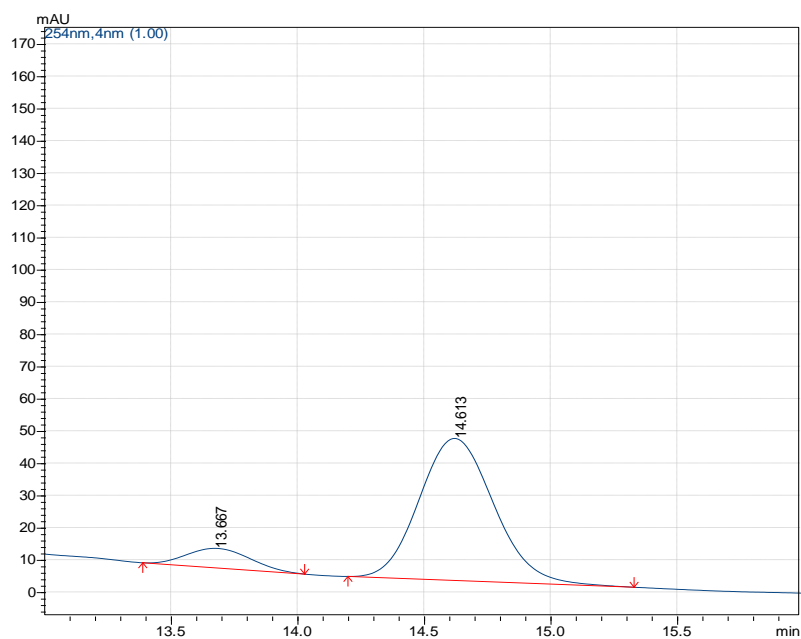

| Peak# | Ret. Time | Area    | Peak Start | Peak End | Area%   |
|-------|-----------|---------|------------|----------|---------|
| 1     | 13.595    | 8587514 | 13.141     | 14.101   | 49.8409 |
| 2     | 14.524    | 8642334 | 14.101     | 15.328   | 50.1591 |

| Peak# | Ret. Time | Area   | Peak Start | Peak End | Area%   |
|-------|-----------|--------|------------|----------|---------|
| 1     | 13.667    | 104866 | 13.387     | 14.027   | 10.3996 |
| 2     | 14.613    | 903496 | 14.197     | 15.328   | 89.6004 |

**(1E,3R)-2-Methyl-1-phenyl-1,5-hexadiene-3-ol (compound 2s)**

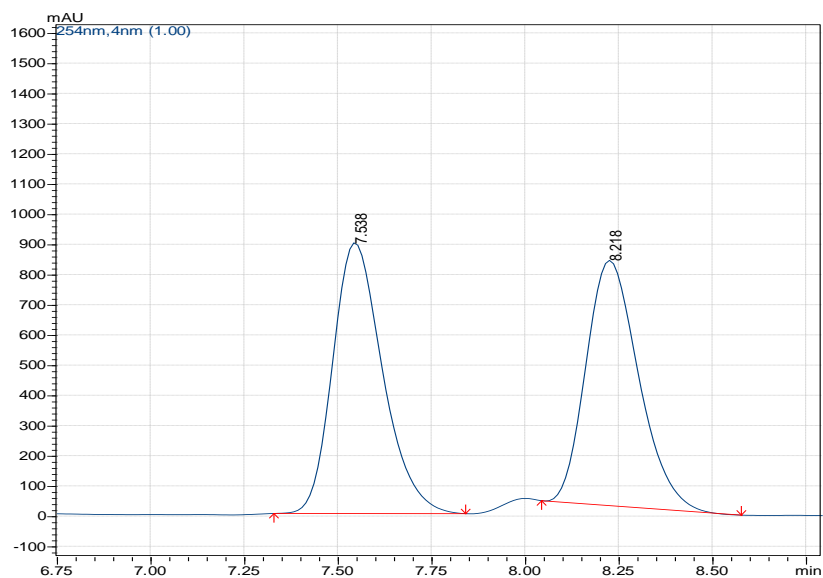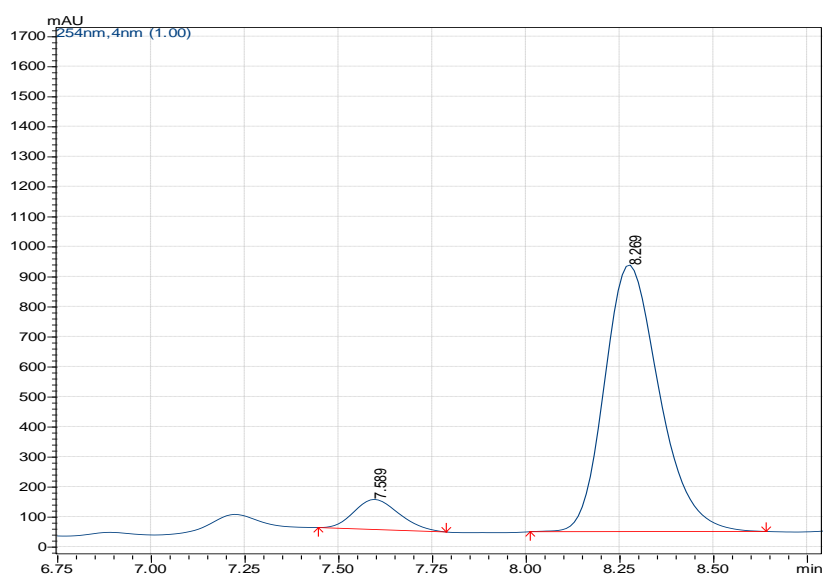

| Peak# | Ret. Time | Area    | Peak Start | Peak End | Area%   |
|-------|-----------|---------|------------|----------|---------|
| 1     | 7.538     | 8315913 | 7.328      | 7.840    | 51.2392 |
| 2     | 8.218     | 7913667 | 8.043      | 8.576    | 48.7608 |

| Peak# | Ret. Time | Area    | Peak Start | Peak End | Area%   |
|-------|-----------|---------|------------|----------|---------|
| 1     | 7.589     | 836743  | 7.445      | 7.787    | 8.4874  |
| 2     | 8.269     | 9021876 | 8.011      | 8.640    | 91.5126 |

### Copy of $^1\text{H}$ and $^{13}\text{C}$ spectra of homoallyl alcohol products

#### (S)-1-(4-methoxyphenyl)but-3-en-1-ol (compound 2b)

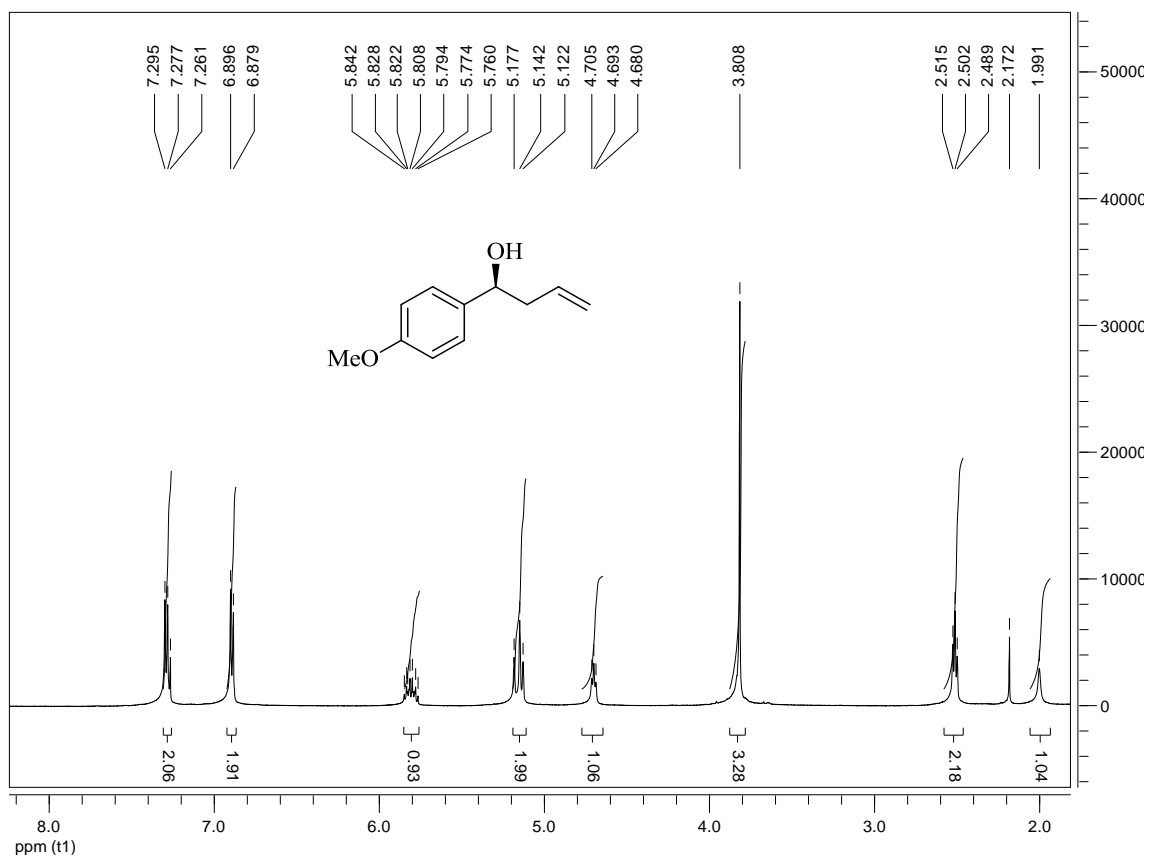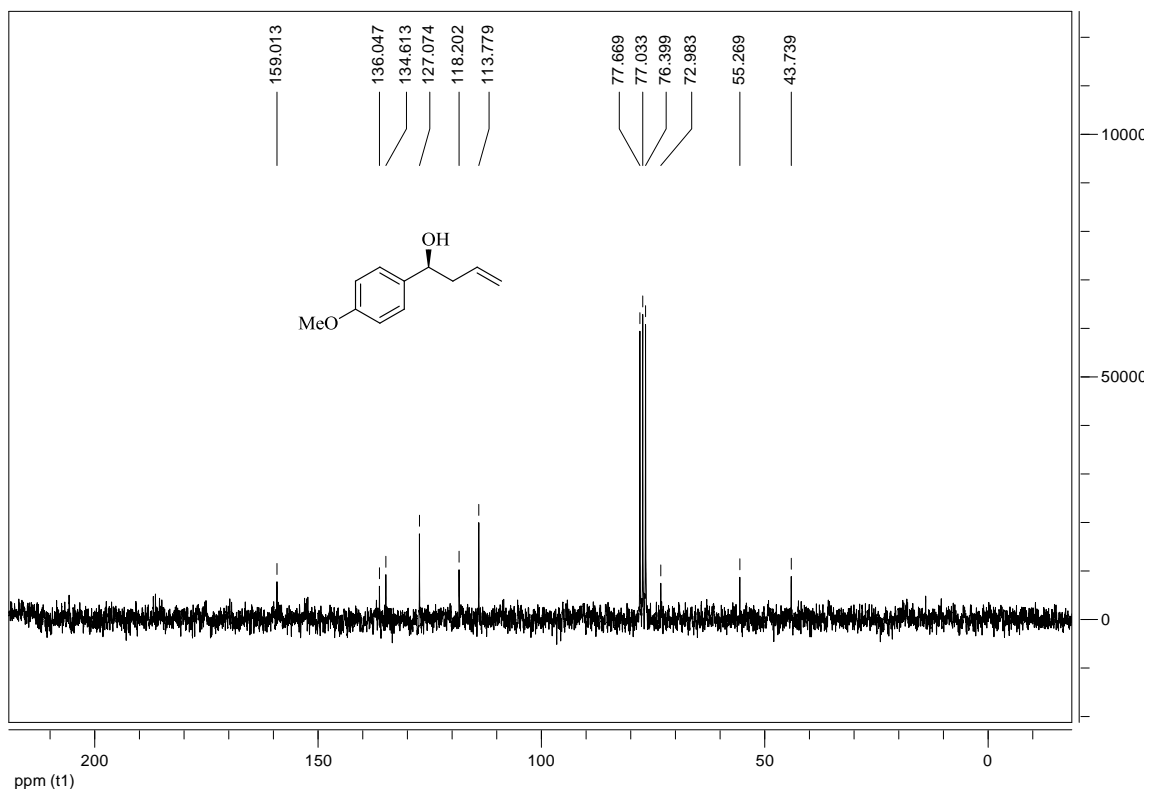

**(4-benzyloxyphenyl)but-3-en-1-ol (compound 2c)**

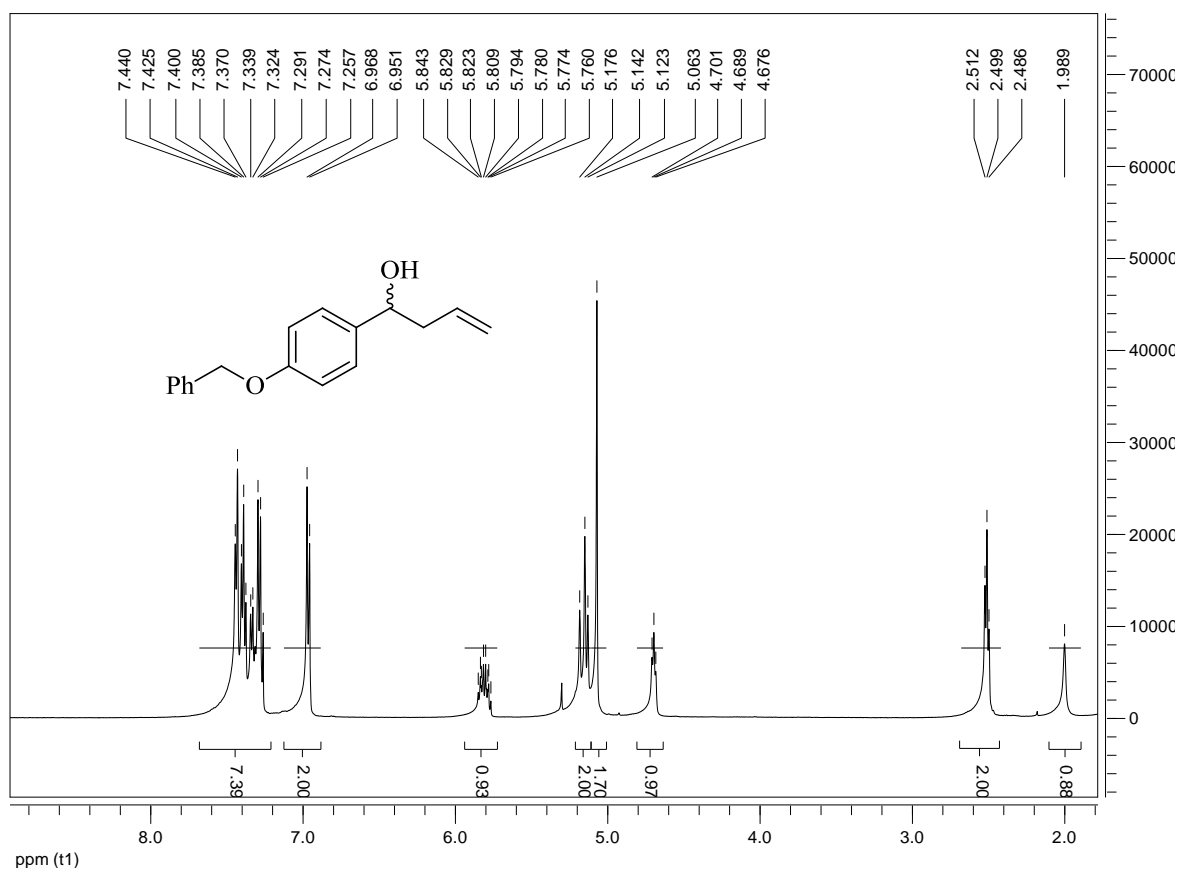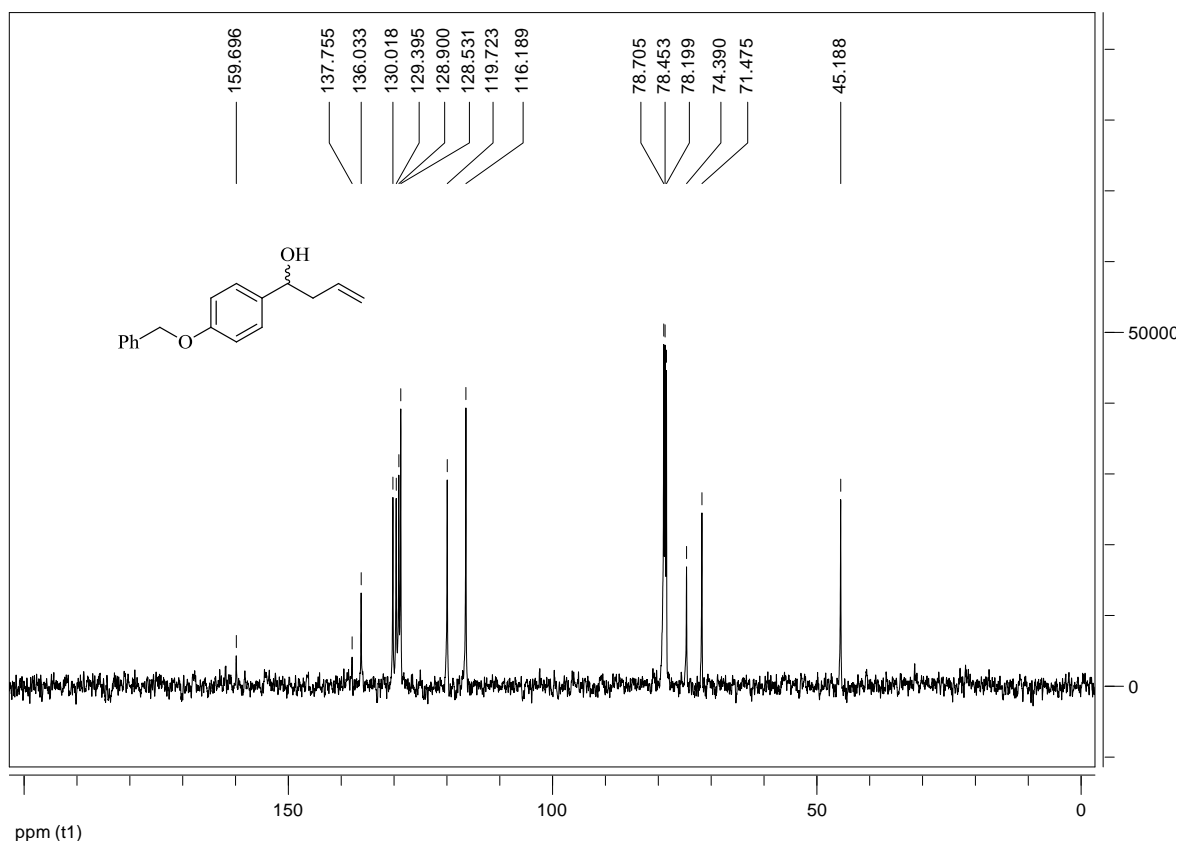

### Copy of $^1\text{H}$ and $^{13}\text{C}$ spectra of all catalysts

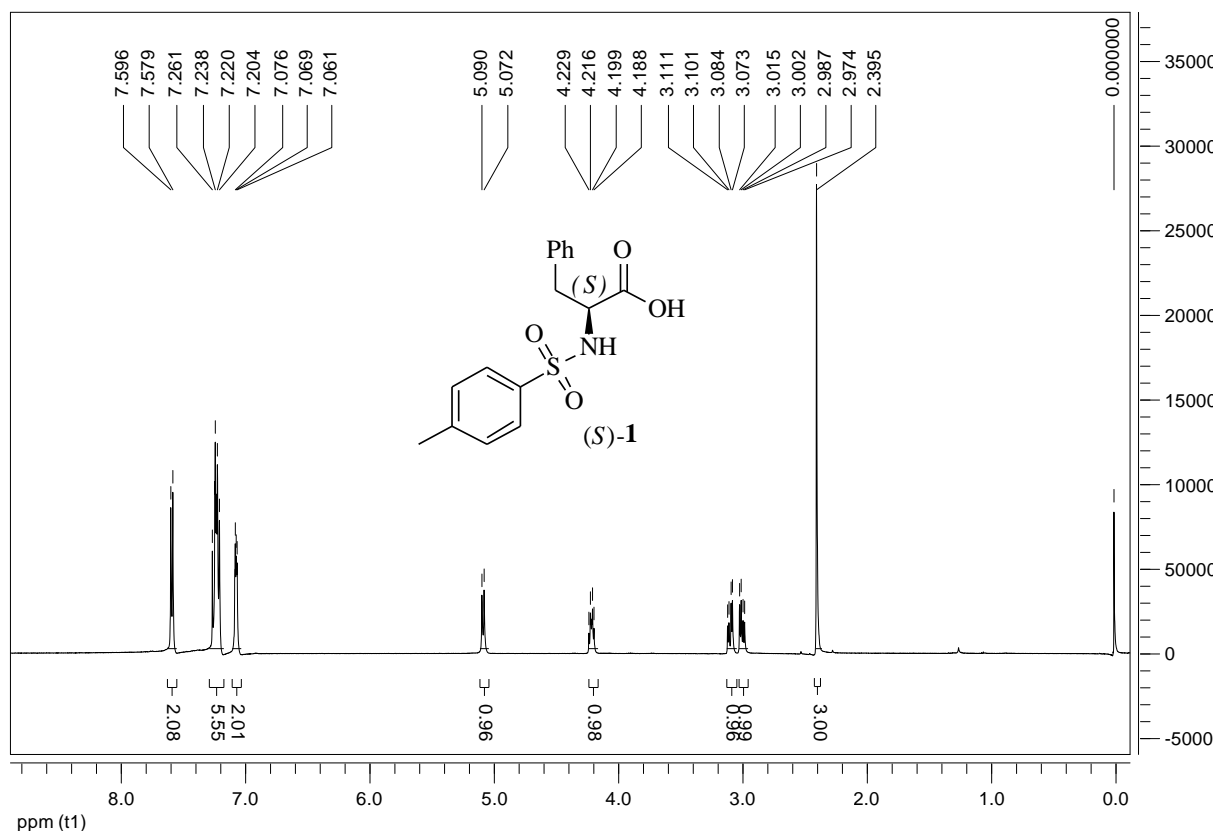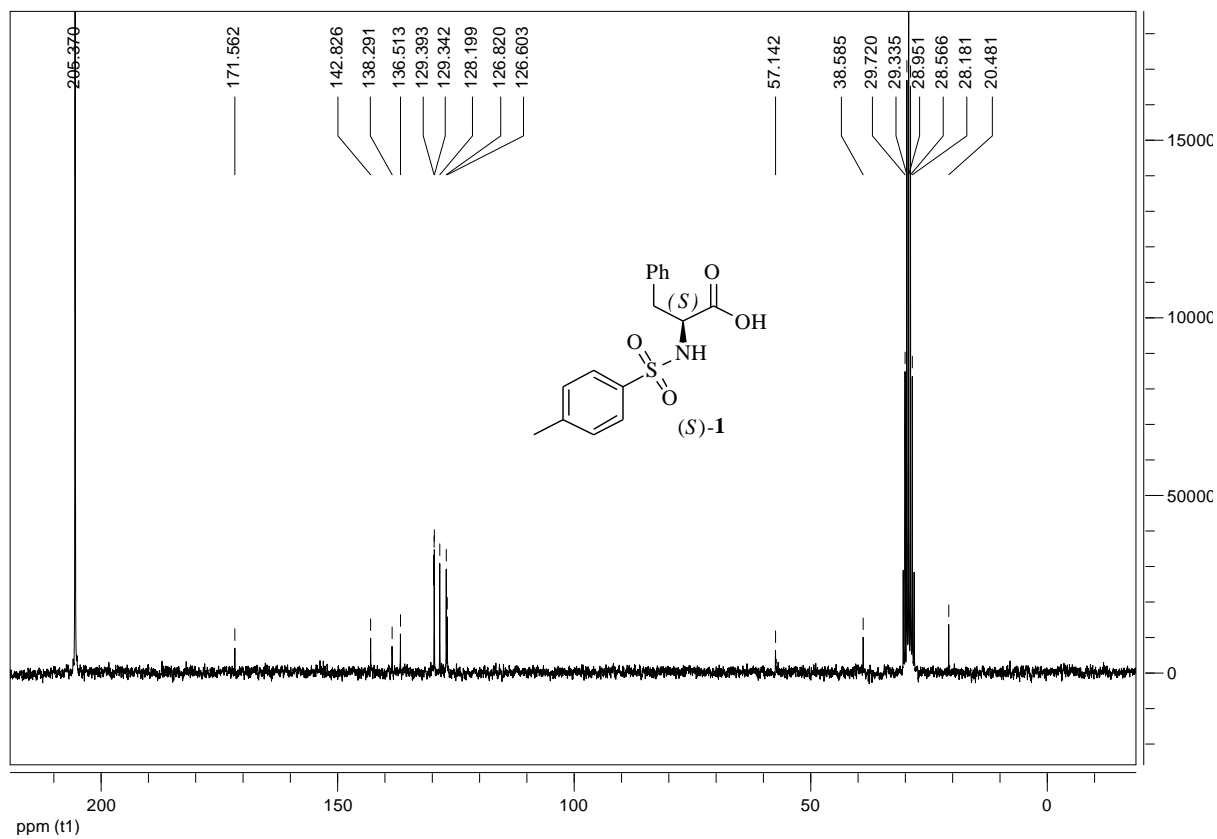

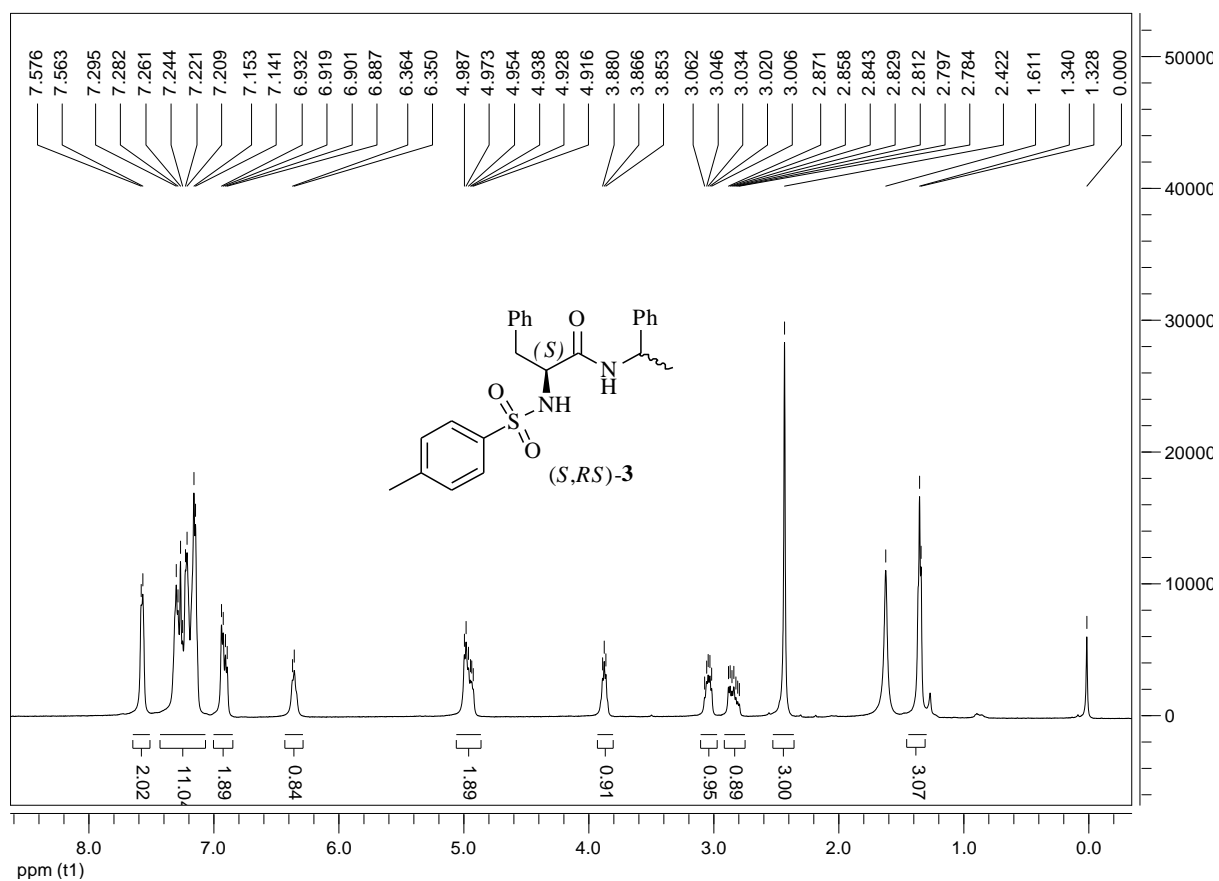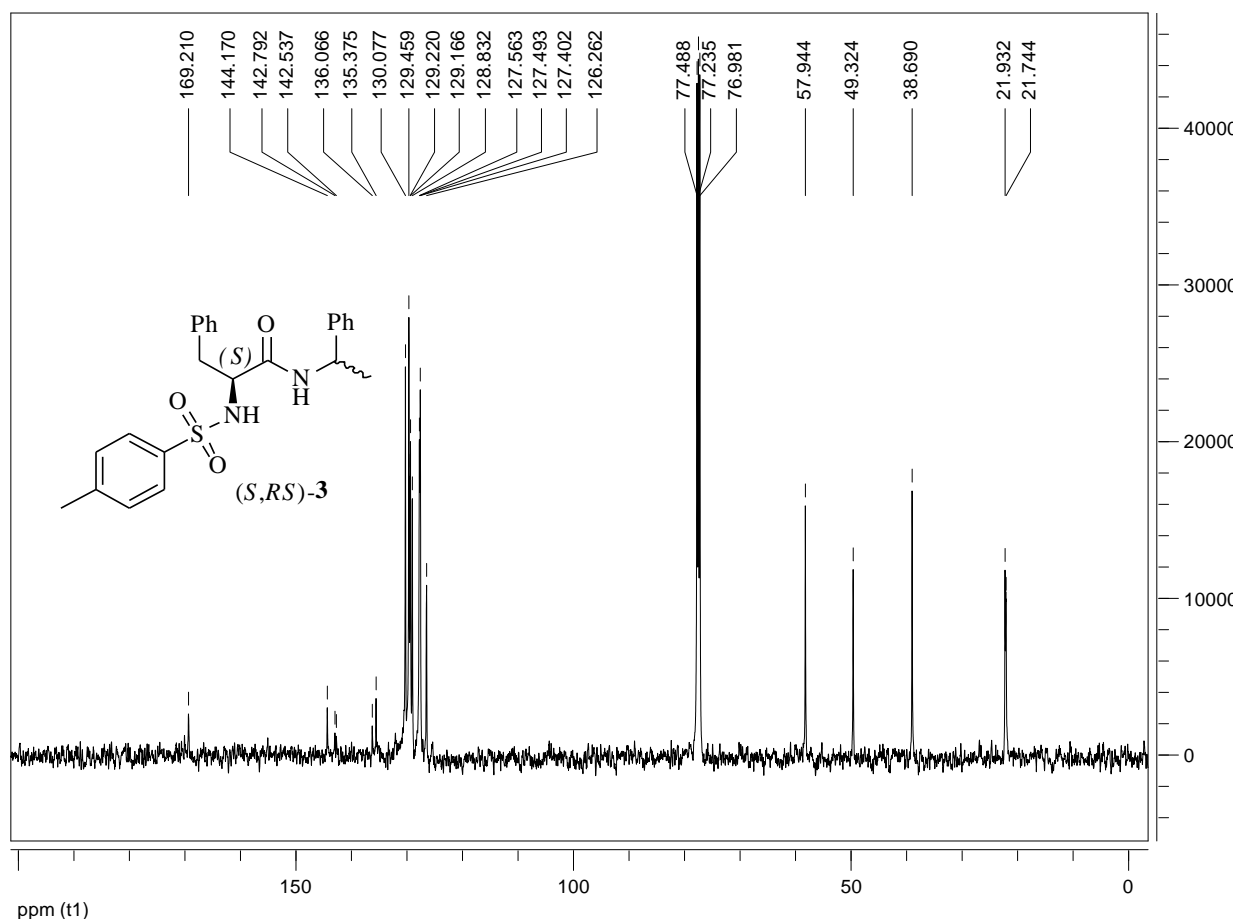



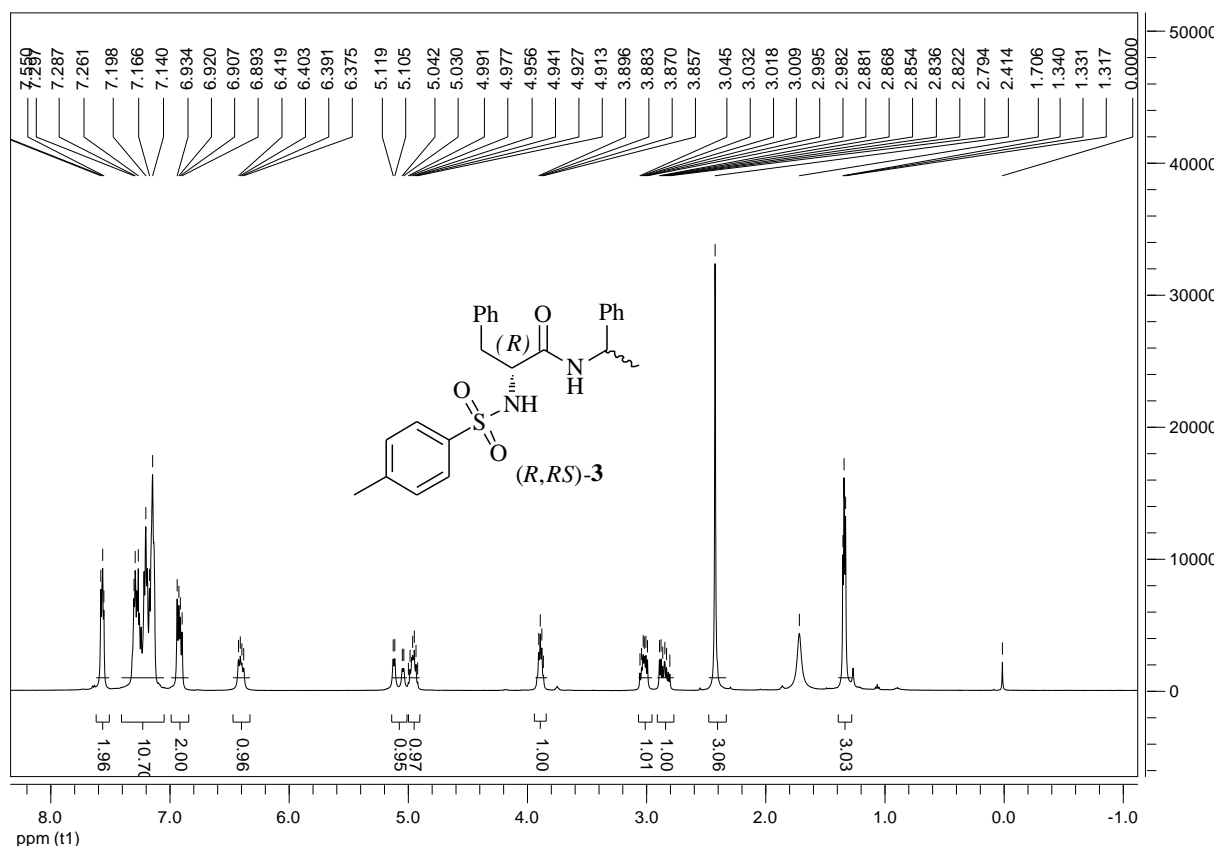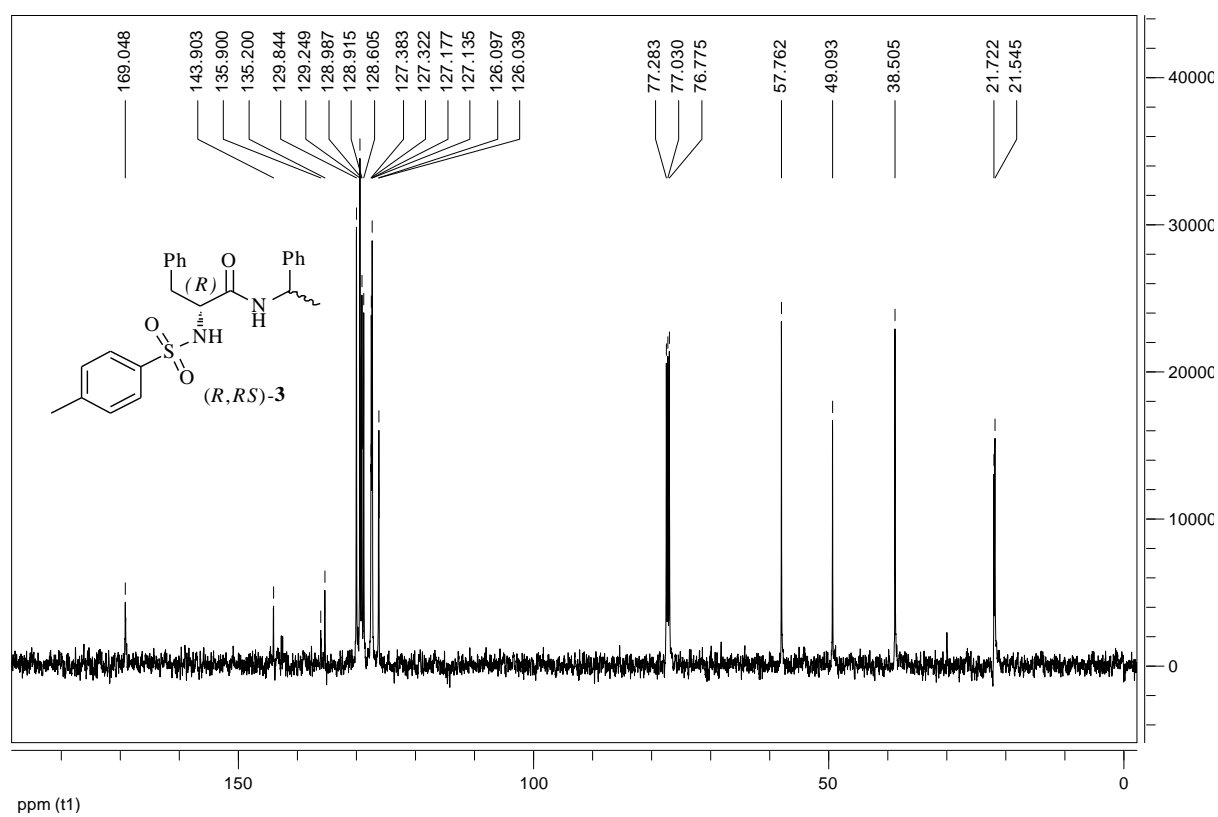

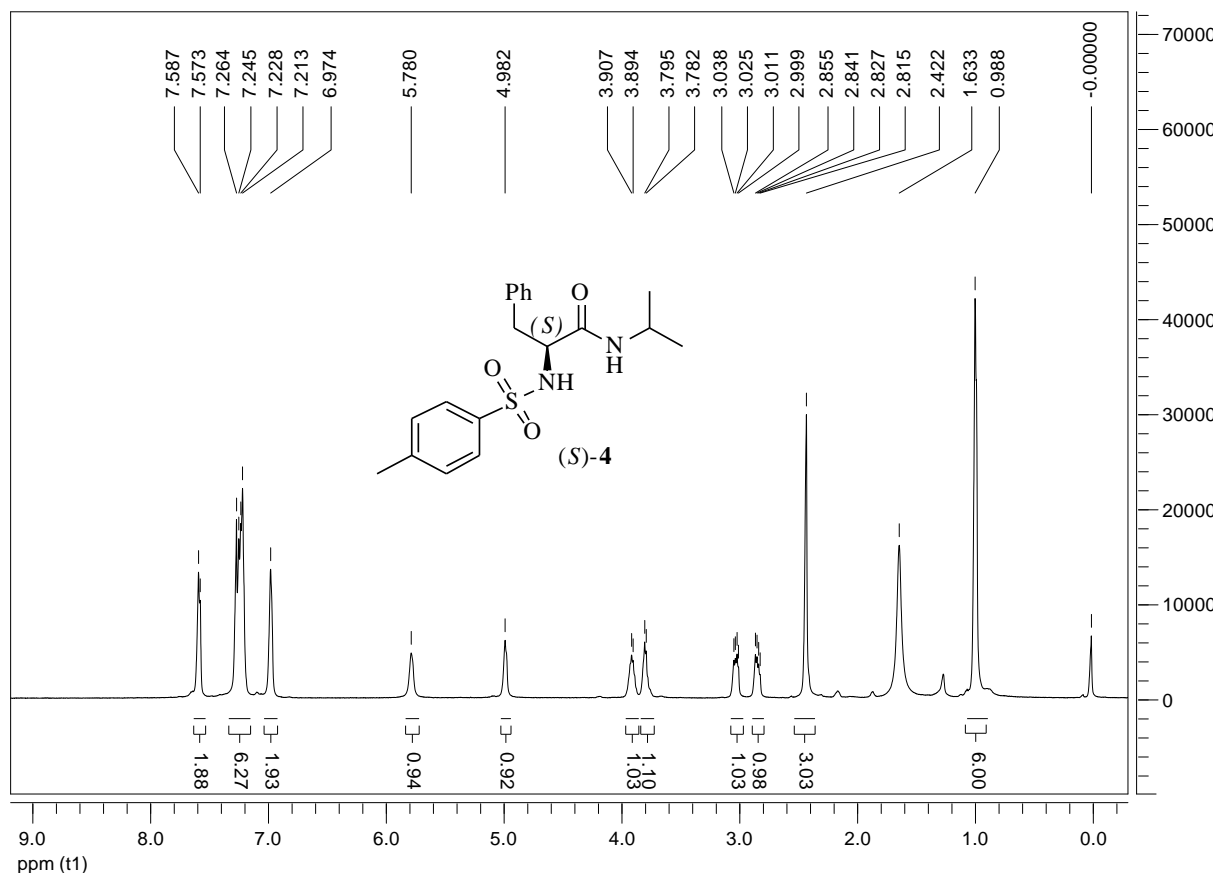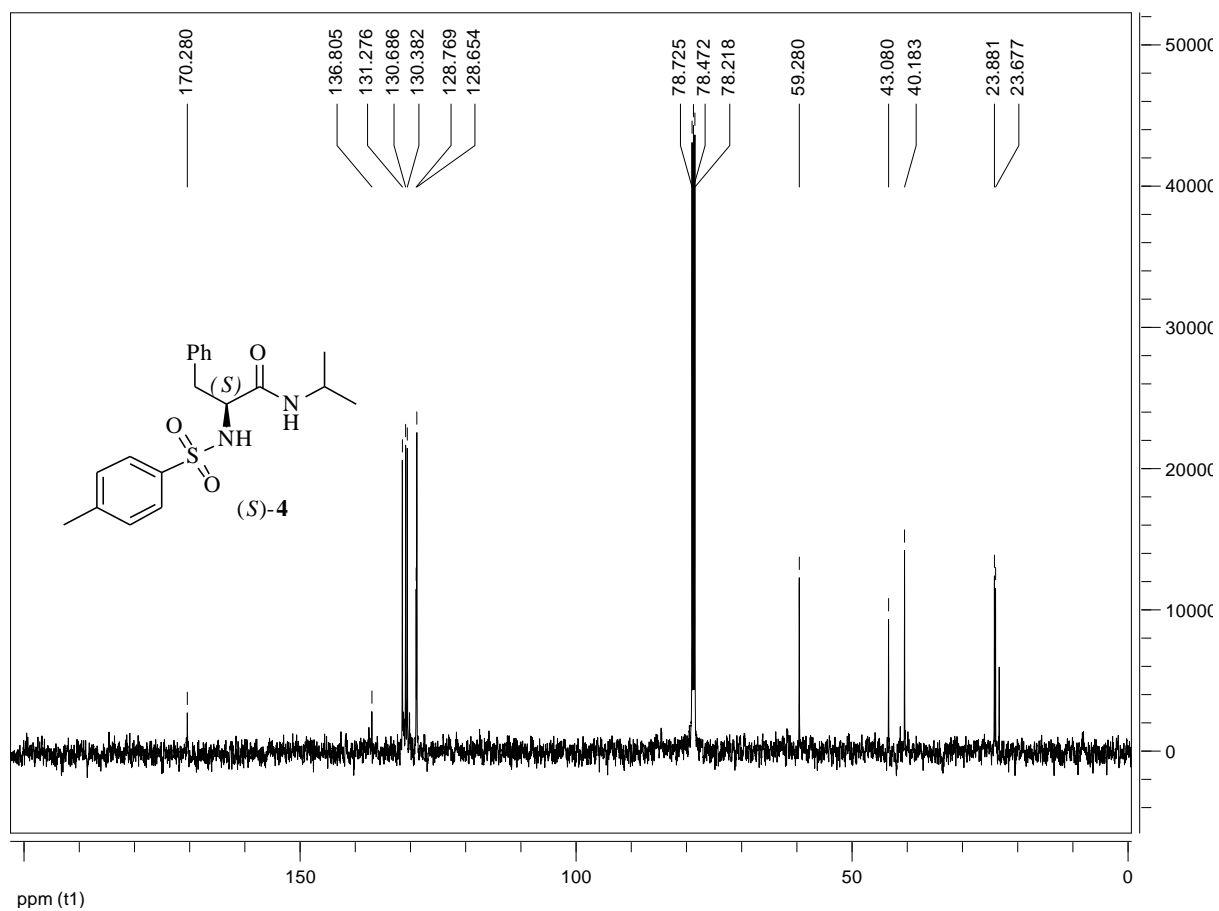

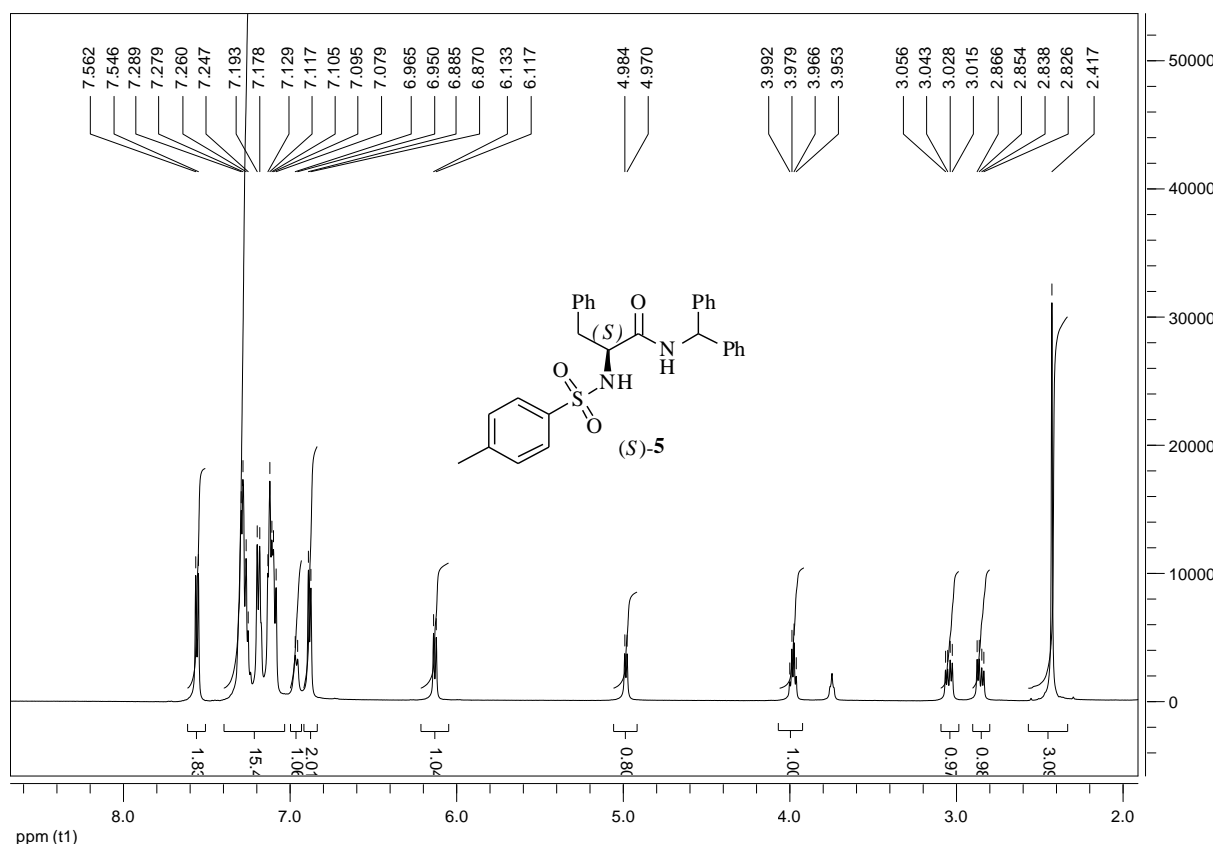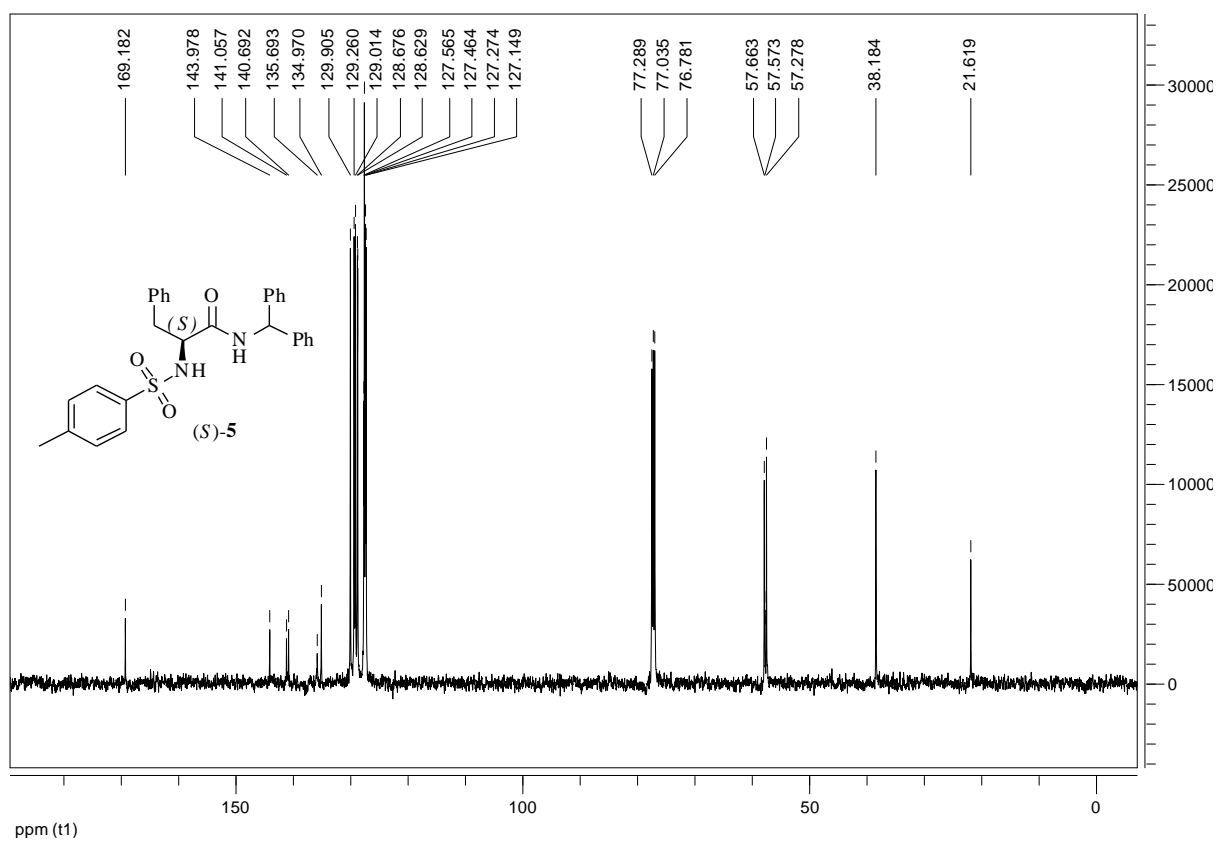

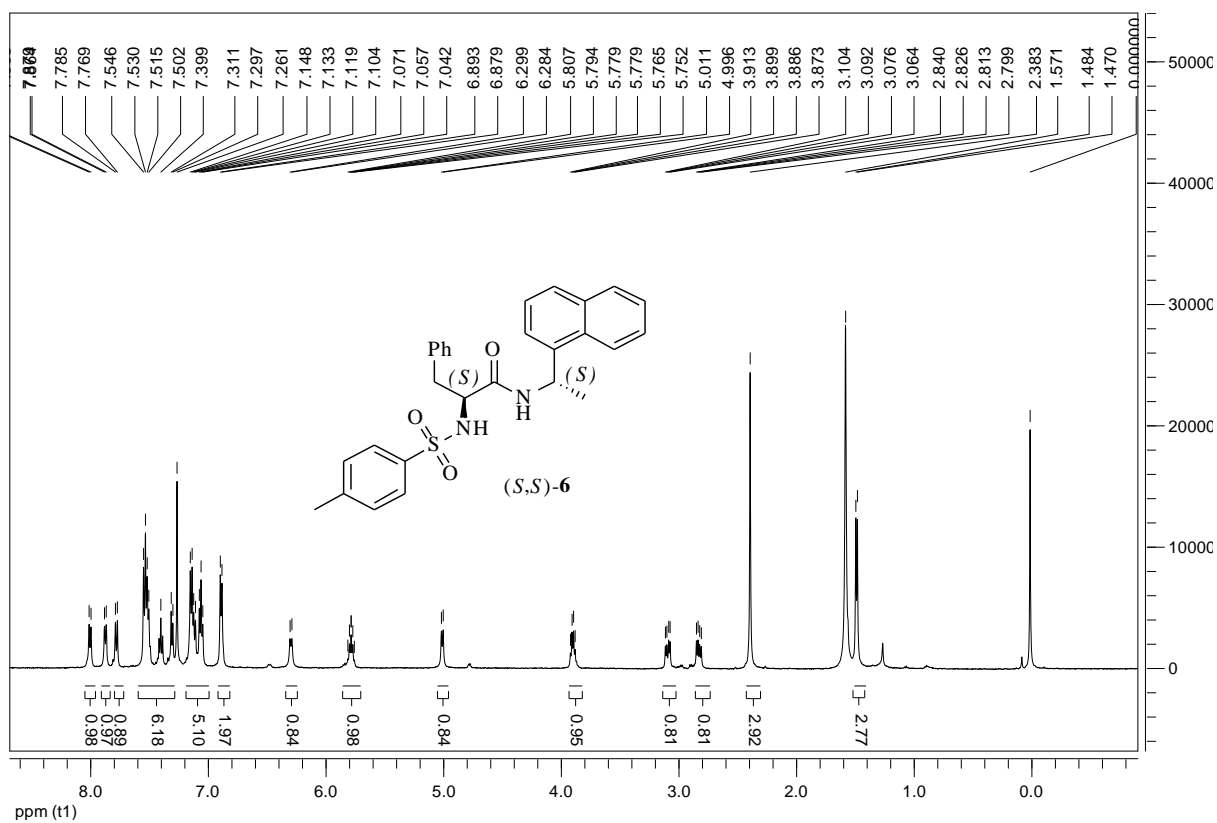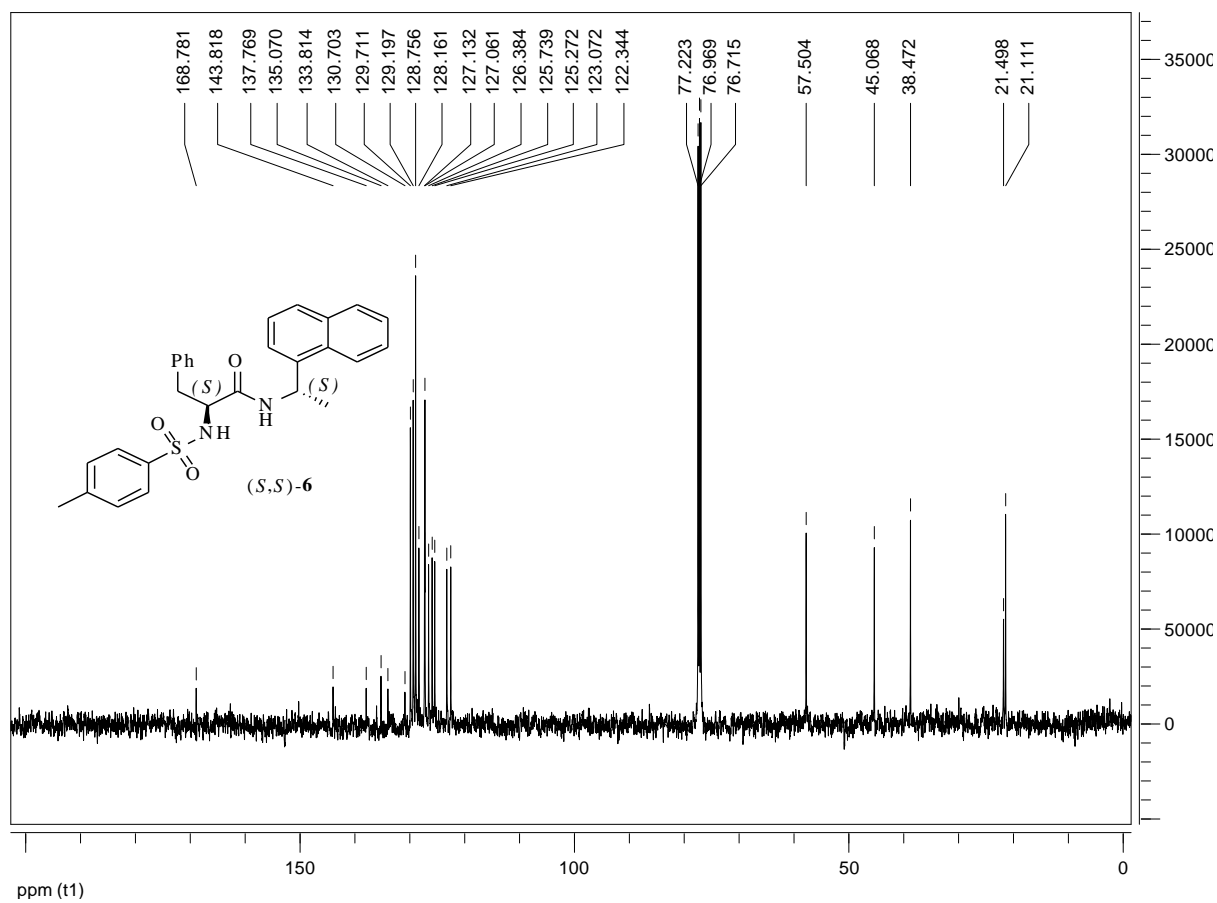

### Copy of $^1\text{H}$ and $^{13}\text{C}$ spectra of pre-catalyst: N-tosyl-protected L-phenylglycine

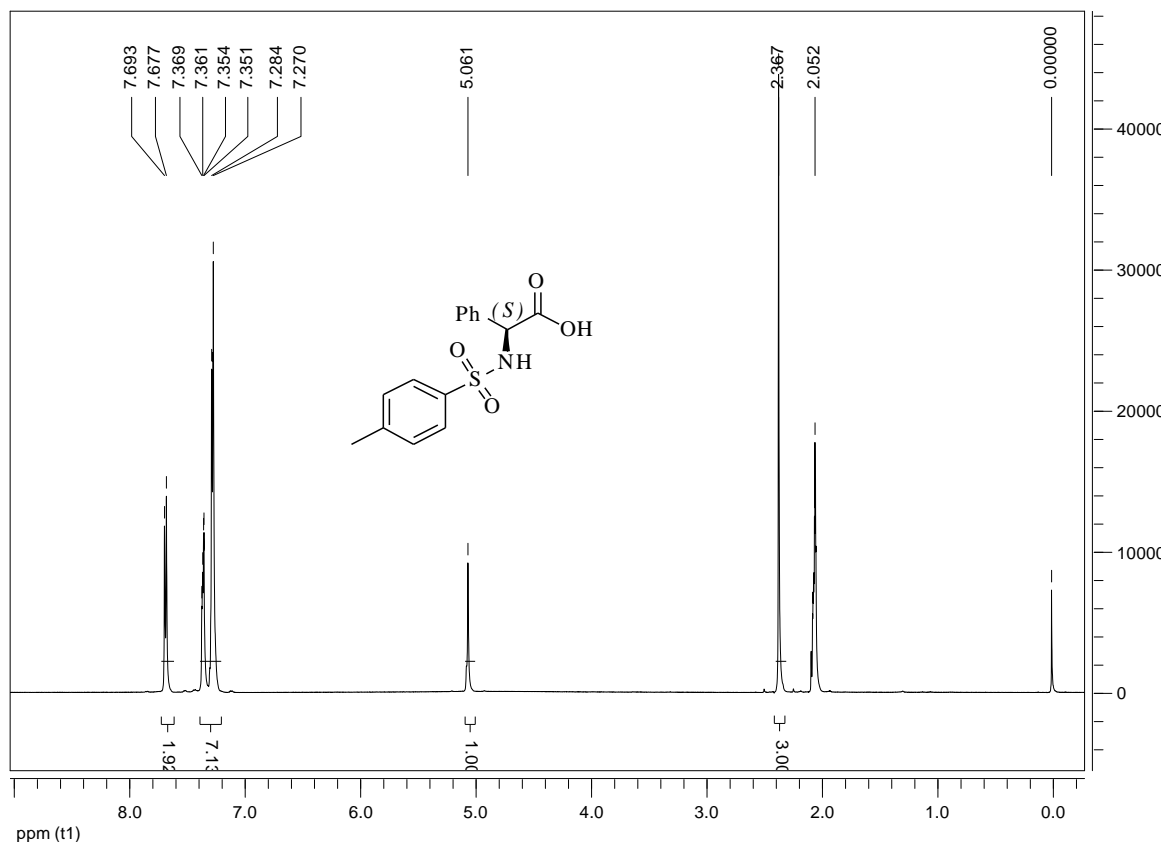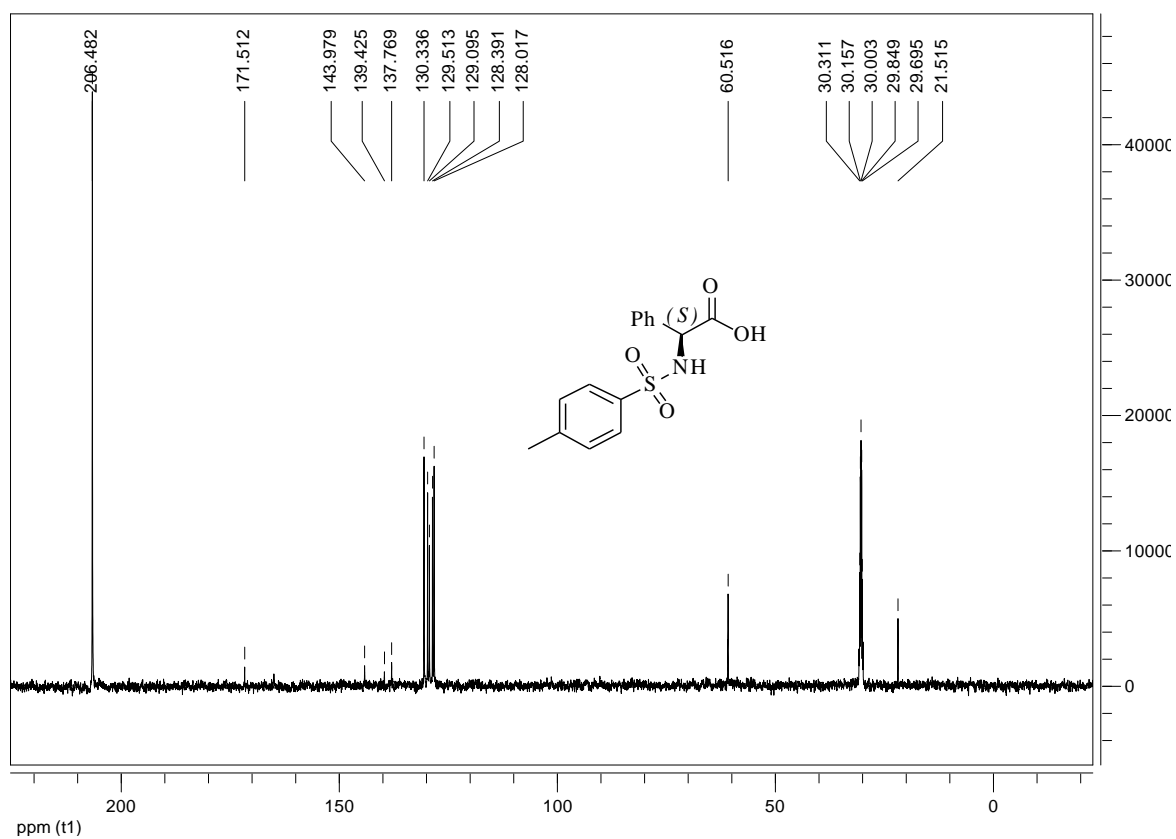

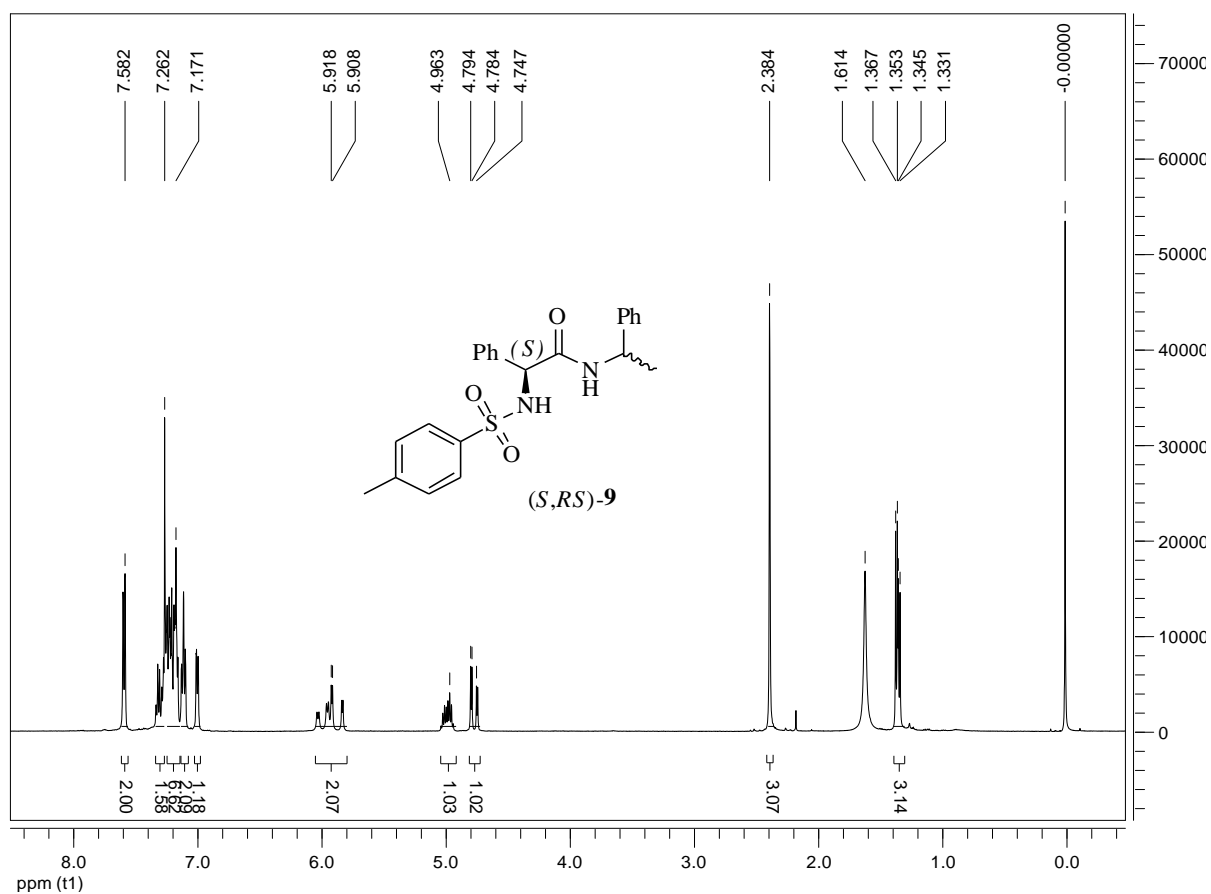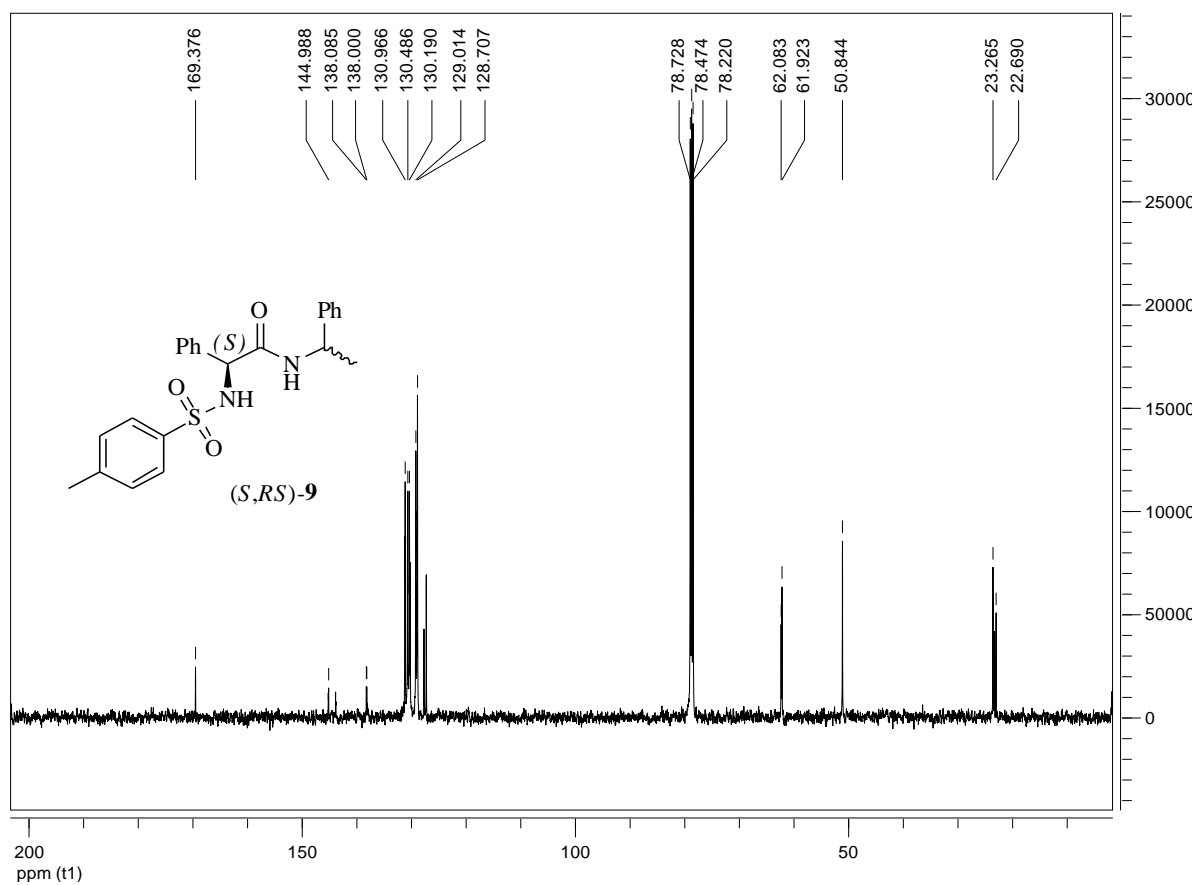

### Copy of $^1\text{H}$ and $^{13}\text{C}$ spectra of pre-catalyst: N-tosyl protected L-alanine

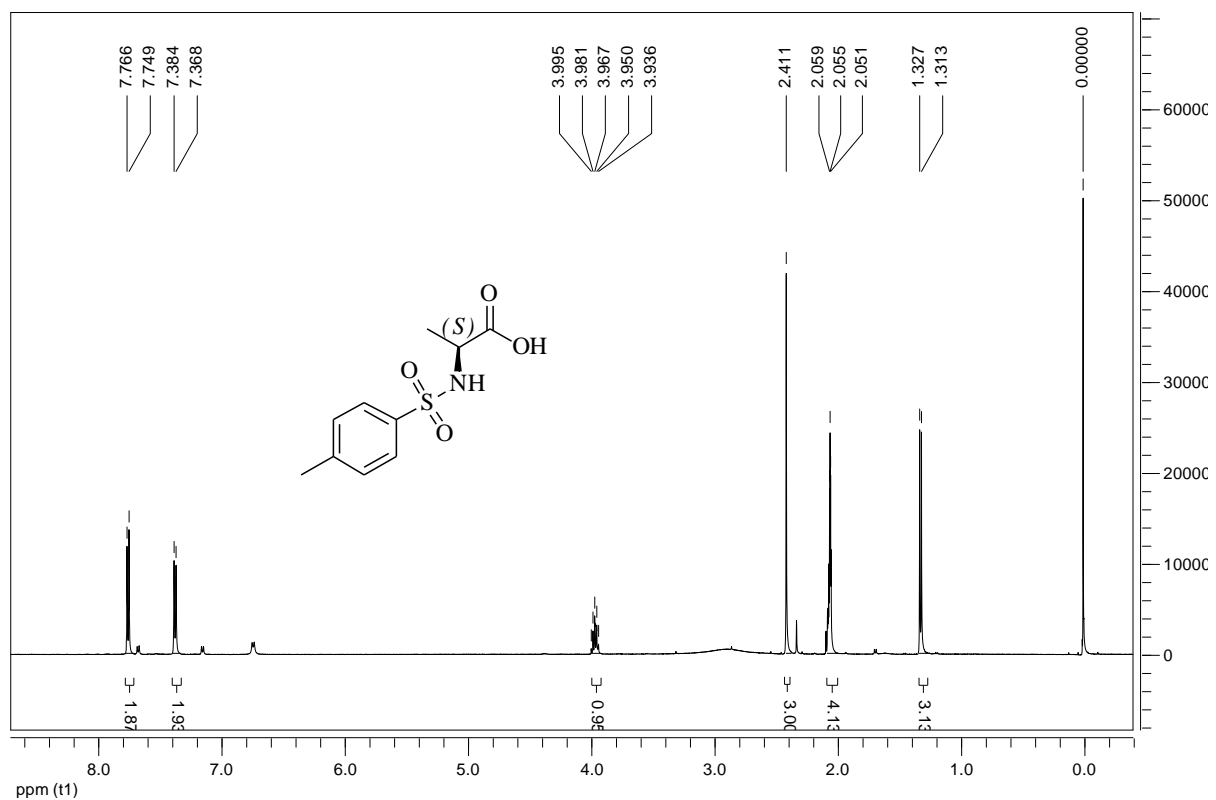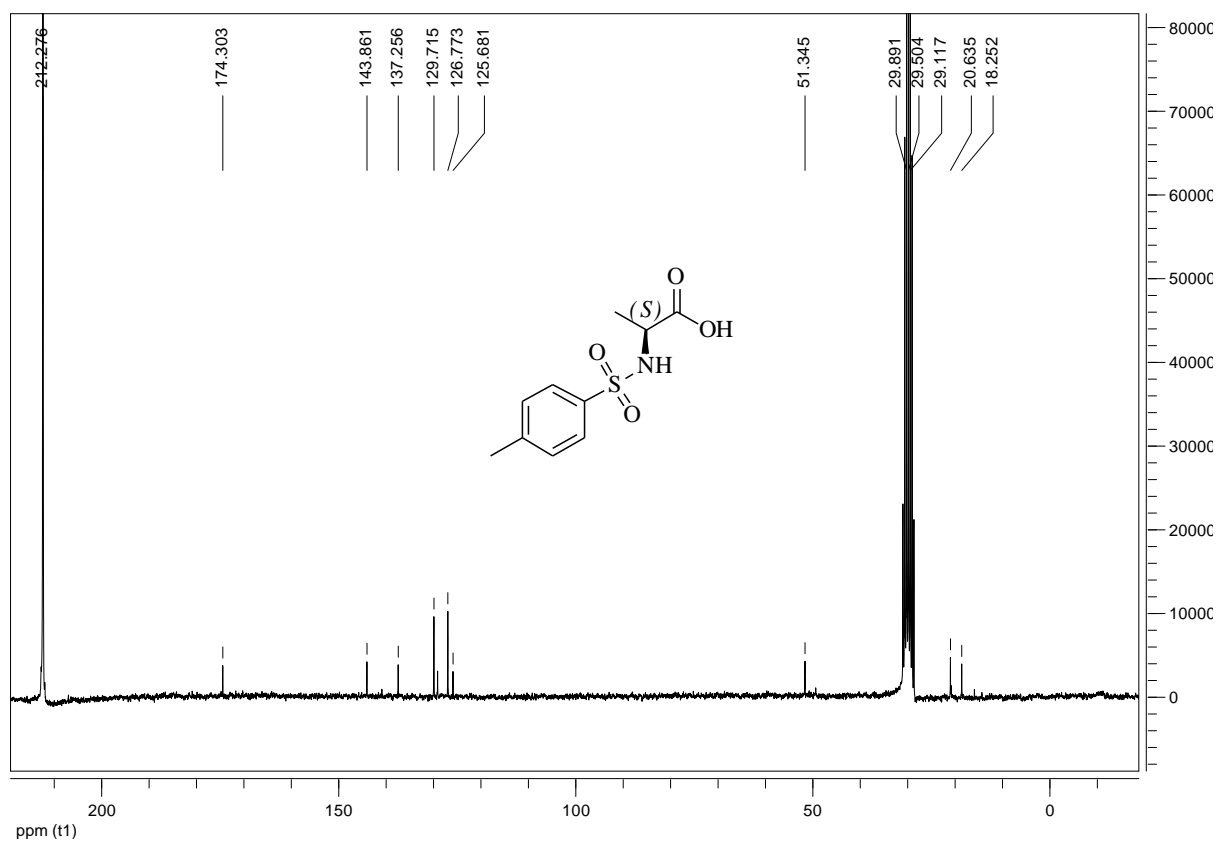

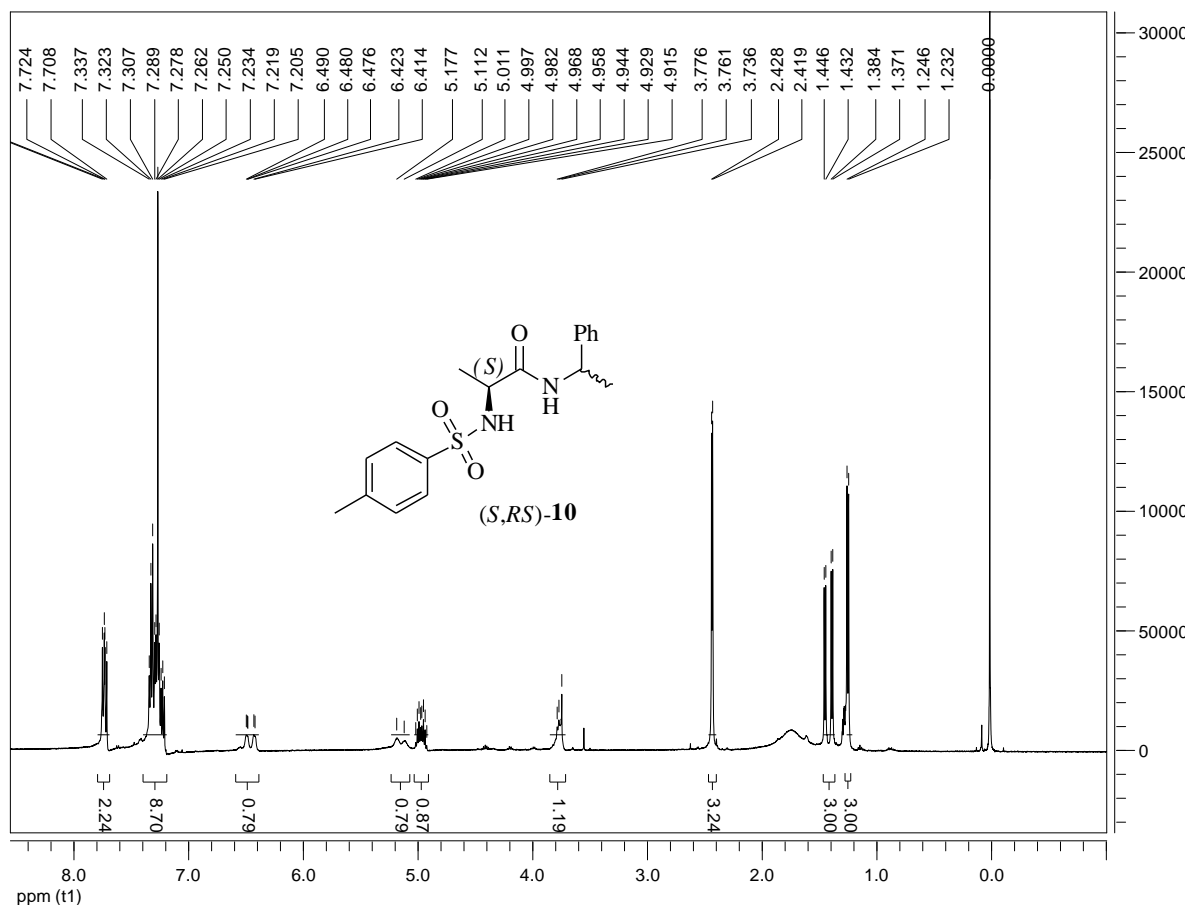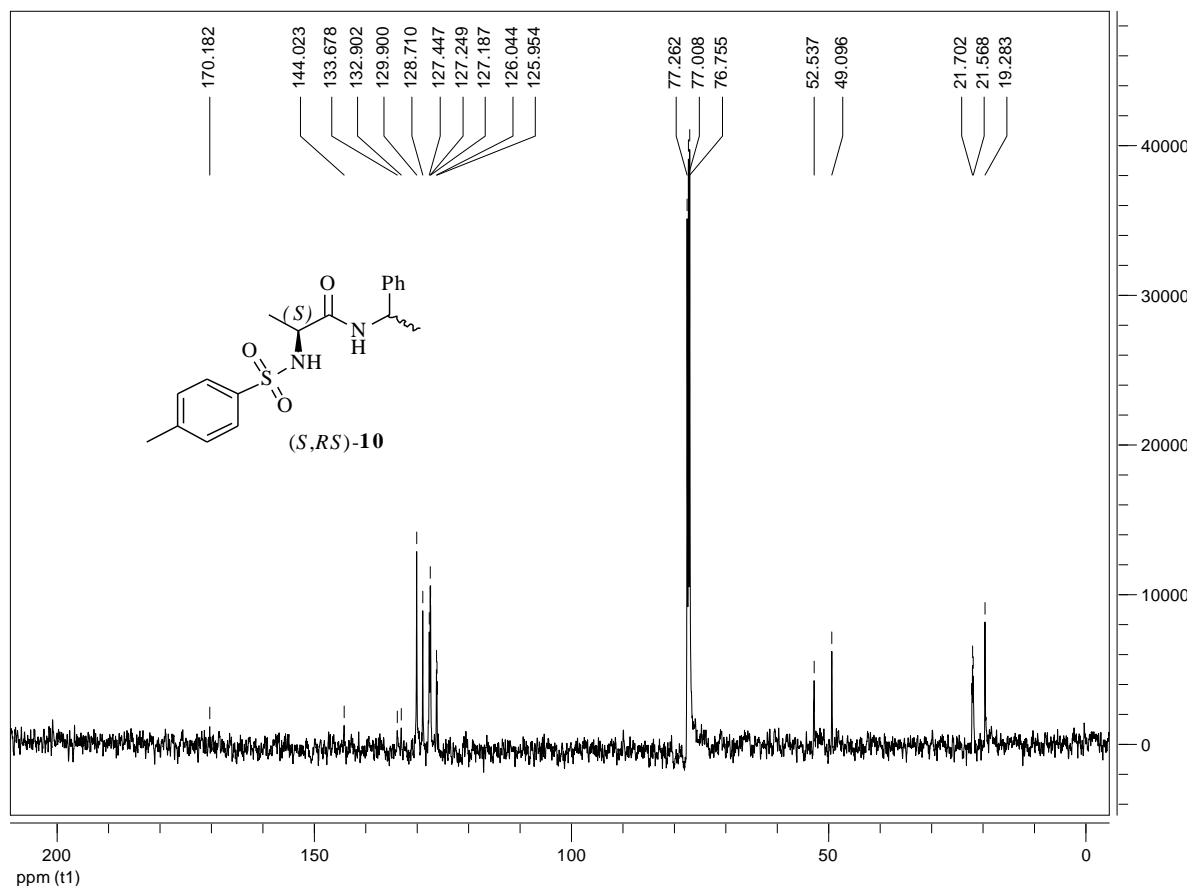



## NMR experiments for mechanistic interpretation

a)  $^1\text{H}$  spectrum of 4-MeO-benzaldehyde taken in  $\text{CDCl}_3$

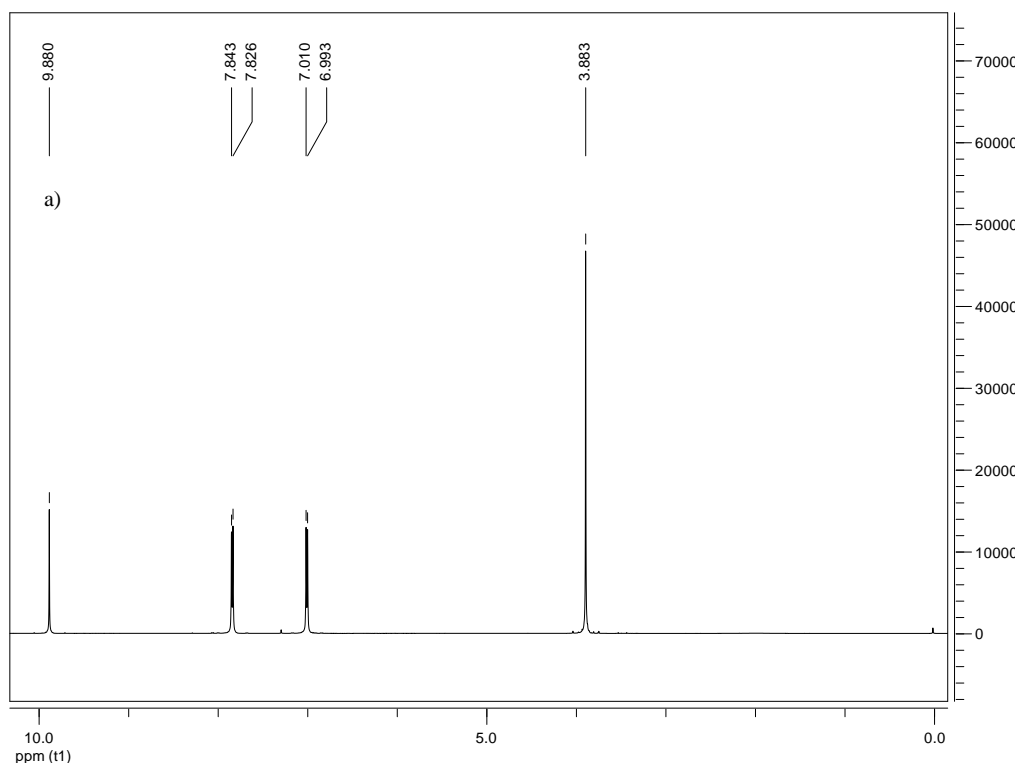

b)  $^1\text{H}$  spectrum of allyltrichlorosilane taken in  $\text{CDCl}_3$

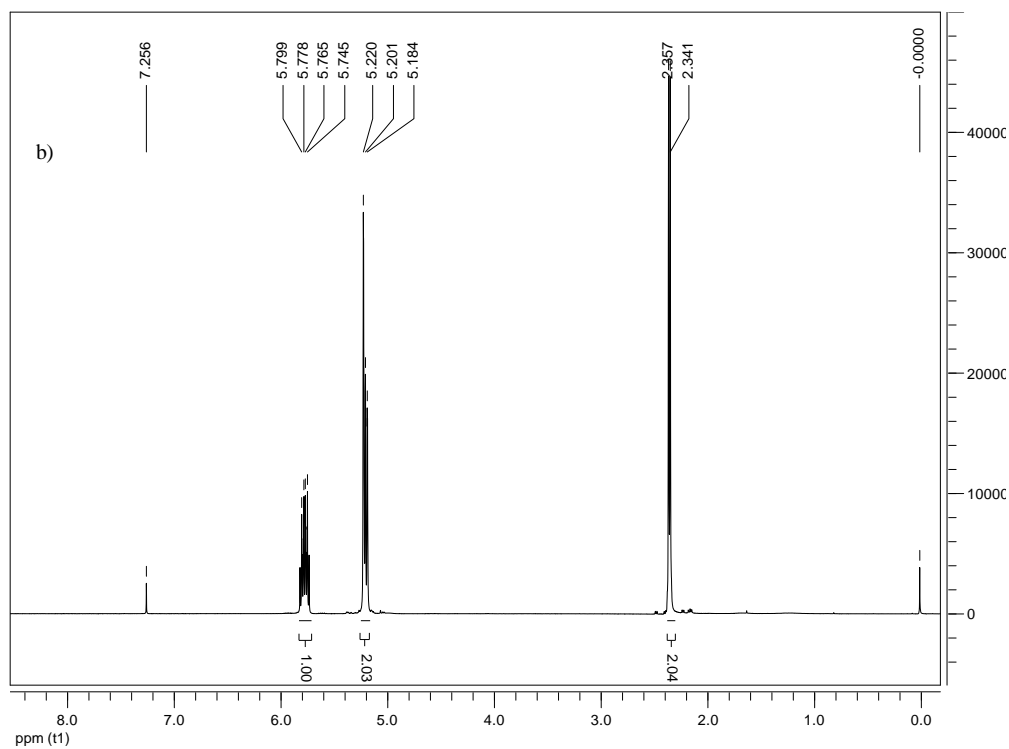

c)  $^1\text{H}$  spectrum of catalyst (*S,R,S*)-**3** after interaction with allyltrichlorosilane and 4-MeO-benzaldehyde (in  $\text{CDCl}_3$ )

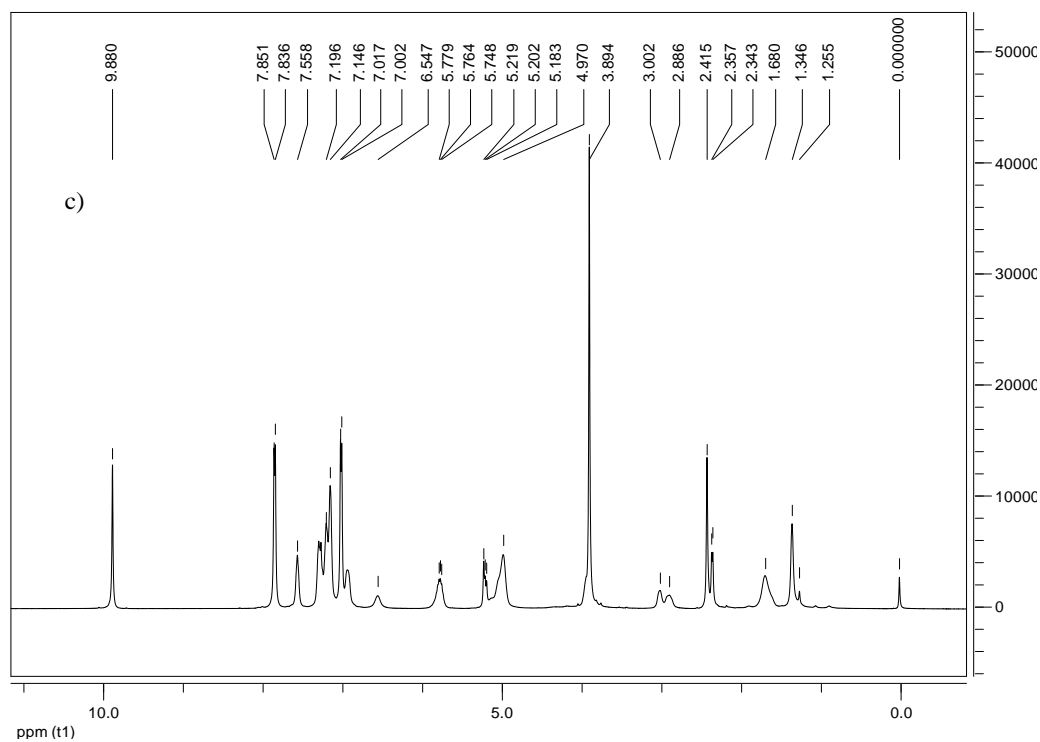

d)  $^{13}\text{C}$  spectrum of 4-MeO-benzaldehyde taken in  $\text{CDCl}_3$

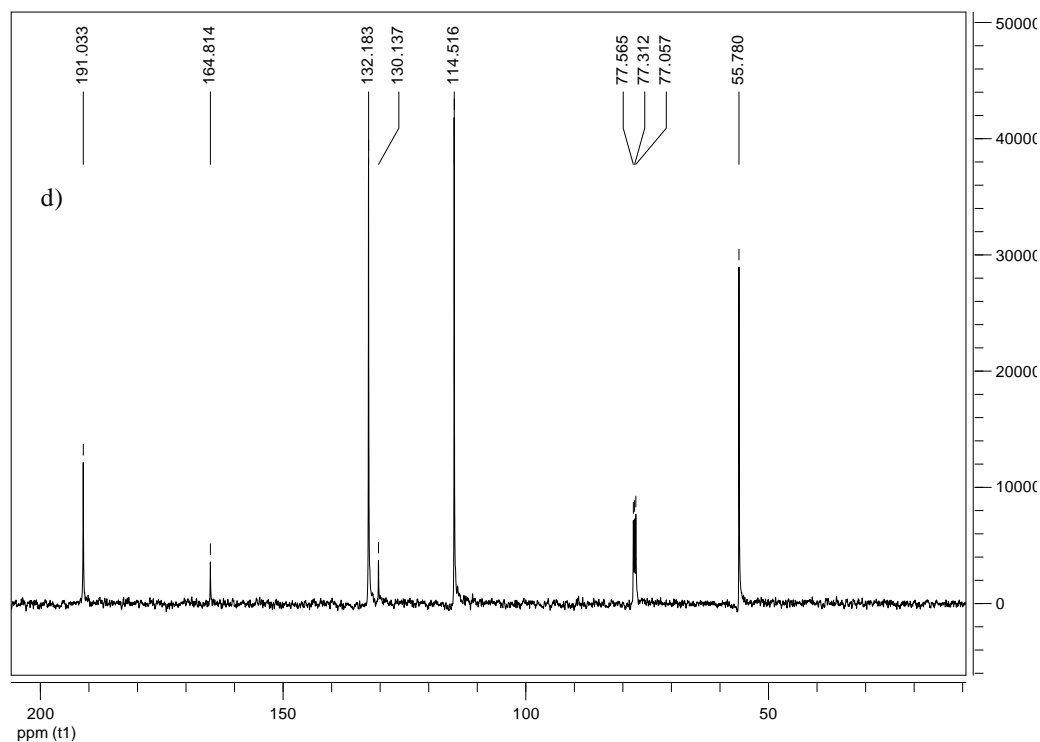

e)  $^{13}\text{C}$  spectrum of allyltrichlorosilane taken in  $\text{CDCl}_3$

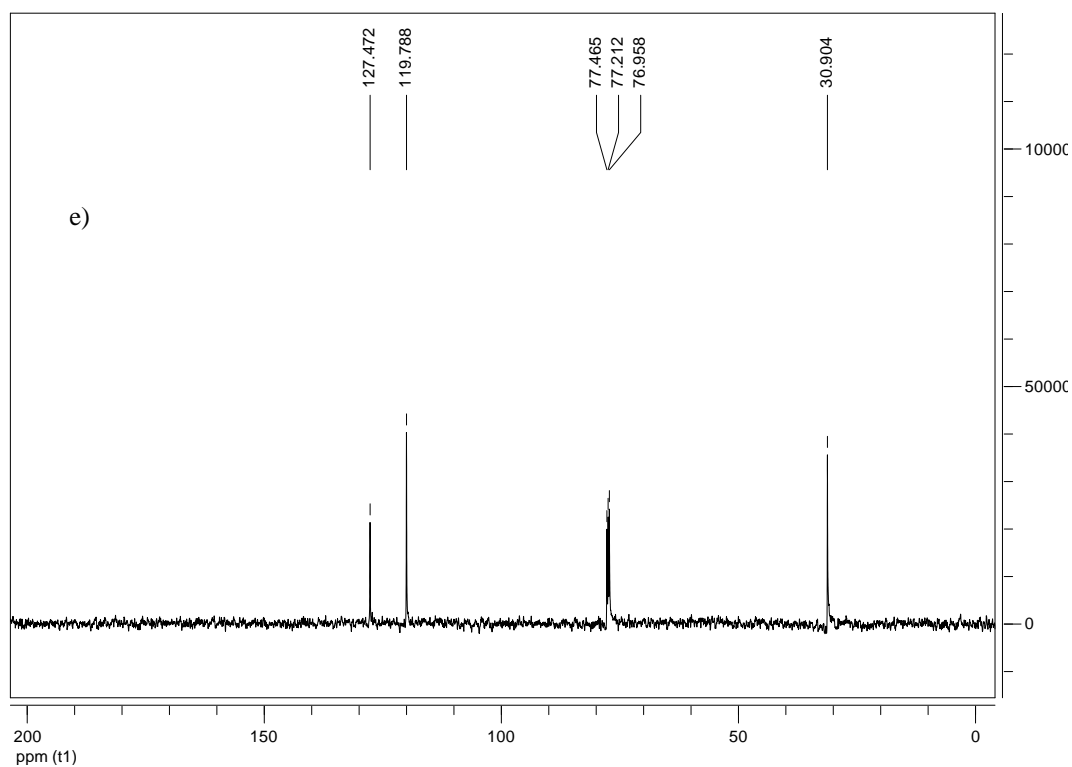

f)  $^{13}\text{C}$  spectrum of catalyst (*S,R,S*)-**3** after interaction with allyltrichlorosilane (in  $\text{CDCl}_3$ )

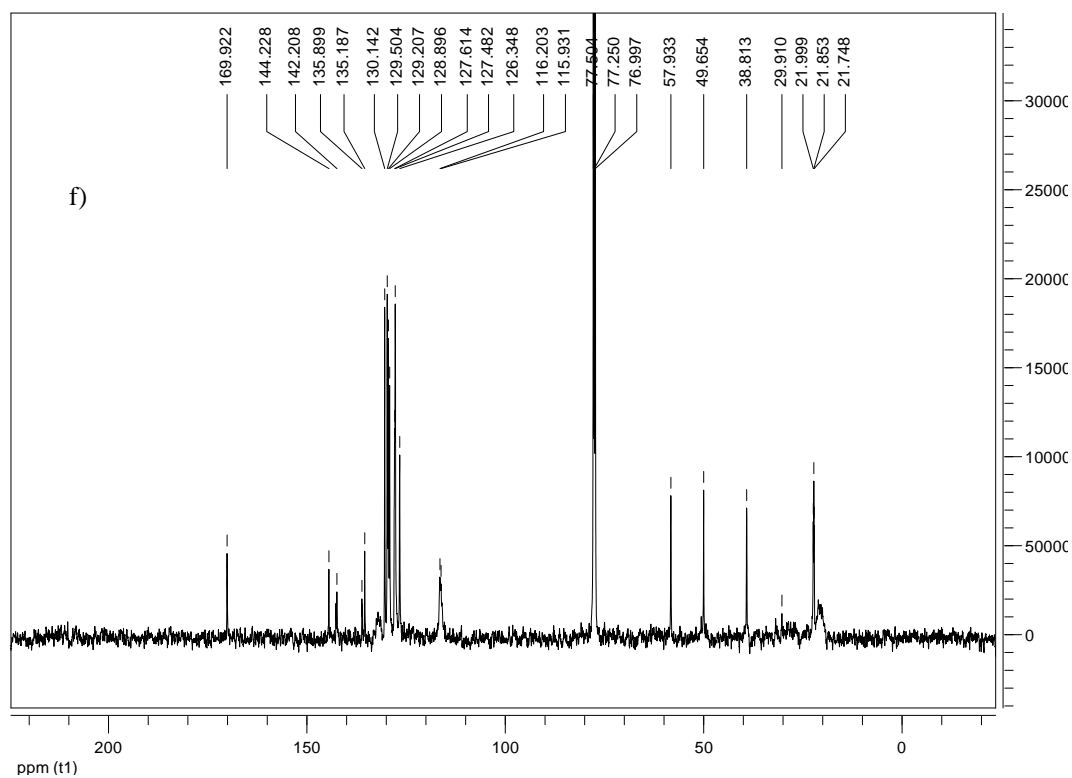

g)  $^{13}\text{C}$  spectrum of catalyst (*S,R,S*)-**3** after interaction with allyltrichlorosilane and 4-MeO-benzaldehyde (in  $\text{CDCl}_3$ )

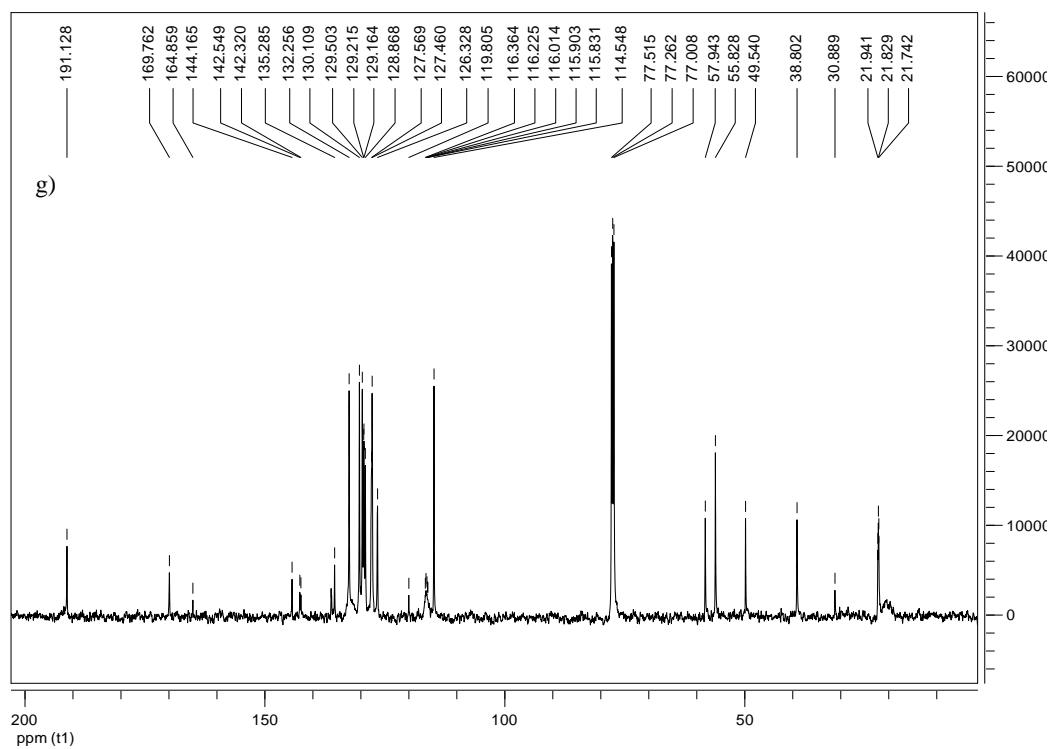

### Quantum chemical calculation details:

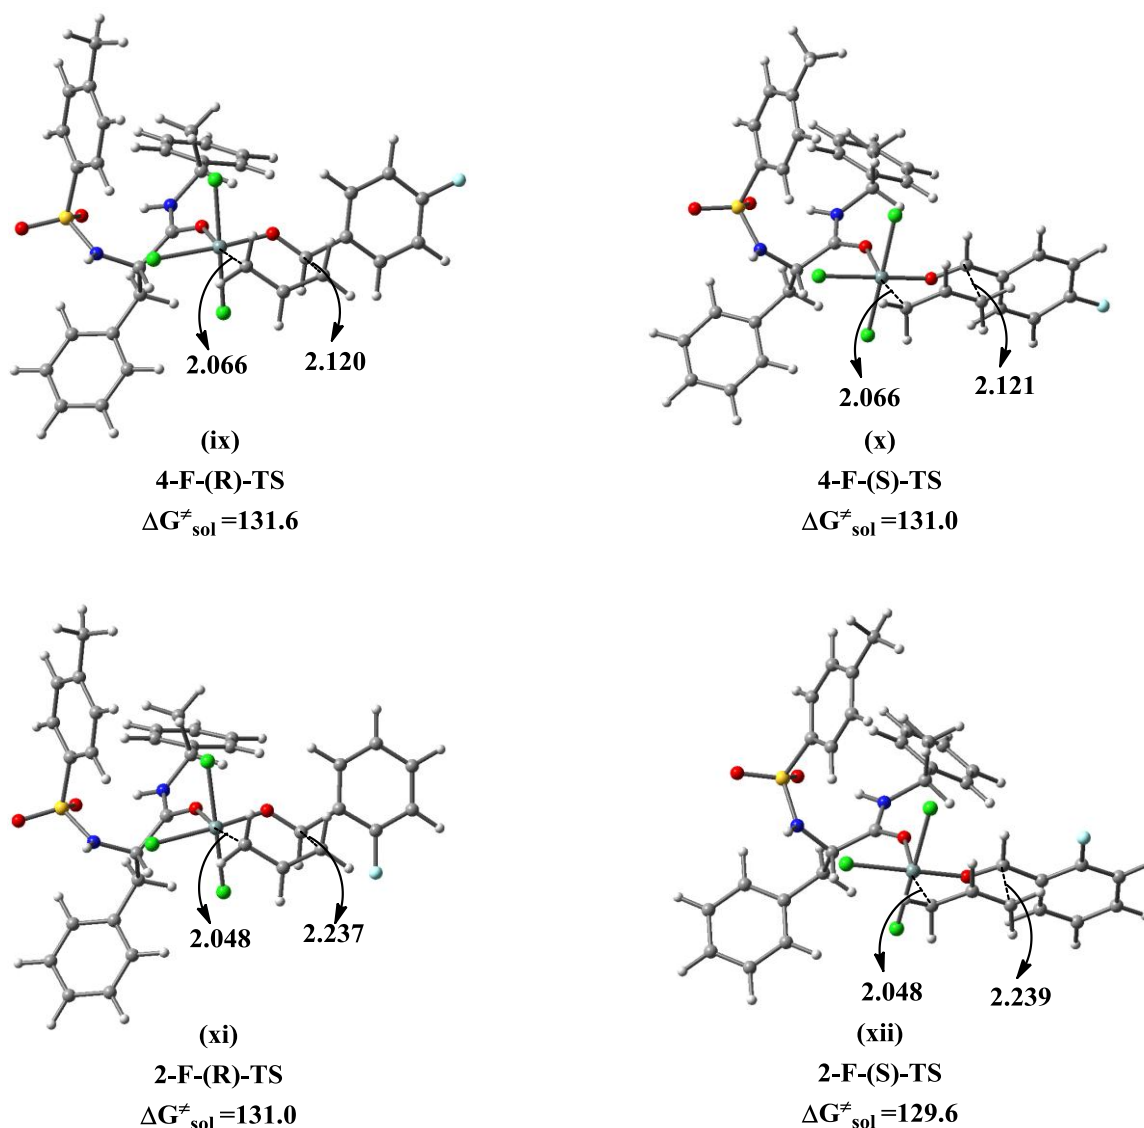

**Figure I:** PBEPBE/6-31G(d) optimized transition state geometries and corresponding their free energy of activation (kJ/mole) from reactants to transition state in  $\text{CH}_2\text{Cl}_2$  solvent catalyzed by catalyst (*S,R*)-**3**. All distances are in Å. [Gray = carbon; white = hydrogen; red = oxygen; blue = nitrogen; yellow = sulfur; green = chlorine; greenish blue = silicon; sky blue = fluorine].

**Table I.** PBEPBE/6-31G(d) and B97D/6-31G//PBEPBE/6-31G(d) calculated electronic energy difference (kJ/mol) between *R* and *S* transition states for fluoro substituted benzaldehydes.

| Substance                                      | PBEPBE/6-31G(d) | B97D/6-31G//PBEPBE/6-31G(d) |
|------------------------------------------------|-----------------|-----------------------------|
| <i>para</i> -flurobenzaldehyde $_{\Delta E^*}$ | 0.6             | 0.6                         |

---

*ortho*-fluro benzaldehyde  $\Delta E^*$  0.7 0.9

---

$$\Delta E^* = E_{R-TS} - E_{S-TS}$$

**Table II. Total electronic energies (kJ/mol) of all the systems calculated at the PBEPBE/6-31G(d) level of theory in gas phase and solvent phase.**

| Substance                             | $E_{\text{Gas}}$ (Hartree) | $E_{\text{Sol}}$ (Hartree) |
|---------------------------------------|----------------------------|----------------------------|
| <i>para</i> -fluro benzaldehyde       | -444.29522132              | -444.30585396              |
| <i>ortho</i> -fluro benzaldehyde      | -444.29295398              | -444.30316666              |
| <i>para</i> -methoxy benzaldehyde     | -459.54272588              | -459.55584222              |
| <i>ortho</i> -methoxy benzaldehyde    | -459.53891804              | -459.55164121              |
| allyltrichlorosillanes                | -1786.61477272             | -1786.62601104             |
| Catalyst( <i>S,S</i> )-3              | -1661.79787308             | -1661.83383009             |
| TS- <i>para</i> -Fluoro( <i>R</i> )   | -3892.70770480             | -3892.76282779             |
| TS- <i>para</i> -Fluoro( <i>S</i> )   | -3892.70797212             | -3892.76305621             |
| TS- <i>ortho</i> -Fluoro( <i>R</i> )  | -3892.70753792             | -3892.7621240              |
| TS- <i>ortho</i> -Fluoro( <i>S</i> )  | -3892.70769761             | -3892.7623876              |
| TS- <i>para</i> -methoxy( <i>R</i> )  | -3907.95480456             | -3908.01236640             |
| TS- <i>para</i> -methoxy( <i>S</i> )  | -3907.95523555             | -3908.01259639             |
| TS- <i>ortho</i> -methoxy( <i>R</i> ) | -3907.95395382             | -3908.01080620             |
| TS- <i>ortho</i> -methoxy( <i>S</i> ) | -3907.95375423             | -3908.01085911             |
| PC- <i>para</i> -methoxy( <i>R</i> )  | -3907.98760439             | -3908.04629692             |
| PC- <i>para</i> -methoxy( <i>S</i> )  | -3907.98740713             | -3908.04700549             |

---

**Table III. PBEPBE/6-31G(d) calculated Gibbs free energies (kJ/mol) for all the systems in gas phase.**

| Substance                             | G <sub>gas</sub> (Hartree) |
|---------------------------------------|----------------------------|
| <i>para</i> -fluro benzaldehyde       | -444.228049                |
| <i>ortho</i> -fluro benzaldehyde      | -444.225626                |
| <i>para</i> -methoxy benzaldehyde     | -459.437771                |
| <i>ortho</i> -methoxy benzaldehyde    | -459.433868                |
| allyltrichlorosillanes                | -1786.576841               |
| Catalyst( <i>S,S</i> )-3              | -1661.415370               |
| TS- <i>para</i> -Fluoro( <i>R</i> )   | -3892.168201               |
| TS- <i>para</i> -Fluoro( <i>S</i> )   | -3892.168416               |
| TS- <i>ortho</i> -Fluoro( <i>R</i> )  | -3892.167264               |
| TS- <i>ortho</i> -Fluoro( <i>S</i> )  | -3892.168144               |
| TS- <i>para</i> -methoxy( <i>R</i> )  | -3907.377576               |
| TS- <i>para</i> -methoxy( <i>S</i> )  | -3907.378858               |
| TS- <i>ortho</i> -methoxy( <i>R</i> ) | -3907.376395               |
| TS- <i>ortho</i> -methoxy( <i>S</i> ) | -3907.376791               |
| PC- <i>para</i> -methoxy( <i>R</i> )  | -3907.413025               |
| PC- <i>para</i> -methoxy( <i>S</i> )  | -3907.413932               |

**Table IV. Coordinates for the structures optimized at the PBEPBE/6-31G(d) level of theory.**

| <i>ortho</i> -fluoro benzaldehyde |           |           |           | <i>para</i> -fluoro benzaldehyde |           |           |           |
|-----------------------------------|-----------|-----------|-----------|----------------------------------|-----------|-----------|-----------|
| Coordinates                       |           |           |           | Coordinates                      |           |           |           |
| at. no.                           | x         | y         | z         | at. no.                          | x         | y         | z         |
| 6                                 | -0.382366 | 0.966771  | 0.000099  | 6                                | 0.156648  | 1.353469  | 0.000574  |
| 6                                 | 0.539253  | -0.097363 | -0.000070 | 6                                | 0.996155  | 0.222173  | -0.000357 |
| 6                                 | 0.028429  | -1.413076 | -0.000157 | 6                                | 0.428737  | -1.070471 | 0.000400  |
| 6                                 | -1.347015 | -1.647642 | -0.000057 | 6                                | -0.955674 | -1.233532 | 0.000336  |
| 6                                 | -2.240330 | -0.560124 | 0.000073  | 6                                | -1.764332 | -0.087067 | -0.000250 |
| 6                                 | -1.763168 | 0.757145  | 0.000121  | 6                                | -1.233315 | 1.208442  | 0.000091  |
| 6                                 | 2.004417  | 0.133733  | 0.000143  | 6                                | 2.465881  | 0.389068  | -0.000277 |
| 8                                 | 2.833042  | -0.772576 | 0.000088  | 8                                | 3.275068  | -0.533022 | -0.000144 |
| 1                                 | -2.437339 | 1.617701  | 0.000342  | 1                                | 0.602303  | 2.355283  | 0.000375  |
| 1                                 | -1.731643 | -2.671810 | -0.000233 | 1                                | -1.908208 | 2.068296  | -0.000316 |
| 1                                 | 0.755818  | -2.231245 | -0.000231 | 1                                | -1.424653 | -2.221211 | 0.000476  |
| 1                                 | 2.322308  | 1.205137  | 0.000030  | 1                                | 1.103938  | -1.931887 | -0.000065 |
| 1                                 | -3.320579 | -0.737615 | 0.000228  | 1                                | 2.809948  | 1.460044  | 0.000136  |
| 9                                 | 0.079087  | 2.240197  | -0.000195 | 9                                | -3.105386 | -0.239871 | -0.000284 |



| <i>ortho</i> -methoxy benzaldehyde |           |           |           | <i>para</i> -methoxy benzaldehyde |           |           |           |
|------------------------------------|-----------|-----------|-----------|-----------------------------------|-----------|-----------|-----------|
| Coordinates                        |           |           |           | Coordinates                       |           |           |           |
| at. no.                            | x         | y         | z         | at. no.                           | x         | y         | z         |
| 6                                  | -1.215582 | 1.205293  | -0.000006 | 6                                 | -0.841449 | 1.048923  | 0.000033  |
| 6                                  | -0.660923 | -0.089337 | 0.000057  | 6                                 | 0.535776  | 1.293281  | 0.000013  |
| 6                                  | 0.752856  | -0.250721 | 0.000130  | 6                                 | 1.463005  | 0.236082  | -0.000025 |
| 6                                  | 1.573343  | 0.893006  | 0.000059  | 6                                 | 0.986560  | -1.095776 | -0.000041 |
| 6                                  | 1.026542  | 2.177245  | -0.000011 | 6                                 | -0.376386 | -1.356409 | -0.000021 |
| 6                                  | -0.370006 | 2.323244  | -0.000040 | 6                                 | -1.301695 | -0.284340 | 0.000017  |
| 1                                  | -2.298515 | 1.349585  | -0.000015 | 1                                 | -1.543065 | 1.886274  | 0.000060  |
| 1                                  | 2.655496  | 0.725753  | 0.000116  | 1                                 | 0.902139  | 2.327329  | 0.000026  |
| 1                                  | 1.675089  | 3.058375  | -0.000023 | 1                                 | 1.720322  | -1.908016 | -0.000070 |
| 1                                  | -0.816135 | 3.323597  | -0.000070 | 1                                 | -0.767884 | -2.377881 | -0.000032 |
| 6                                  | 1.389166  | -1.589898 | 0.000233  | 6                                 | 2.910613  | 0.515650  | -0.000046 |
| 8                                  | 2.606927  | -1.763707 | -0.000369 | 8                                 | 3.793943  | -0.338232 | -0.000083 |
| 1                                  | 0.686519  | -2.457997 | -0.000453 | 1                                 | 3.168496  | 1.611375  | -0.000033 |
| 8                                  | -1.401371 | -1.236886 | 0.000085  | 8                                 | -2.614135 | -0.650820 | 0.000031  |
| 6                                  | -2.823883 | -1.114749 | 0.000026  | 6                                 | -3.596279 | 0.385902  | 0.000093  |
| 1                                  | -3.184193 | -0.587128 | -0.902675 | 1                                 | -3.515553 | 1.020332  | -0.902242 |
| 1                                  | -3.207531 | -2.144832 | 0.000023  | 1                                 | -4.568307 | -0.127164 | 0.000117  |
| 1                                  | -3.184266 | -0.587109 | 0.902688  | 1                                 | -3.515484 | 1.020290  | 0.902451  |
| Allyltrichlorosilanes              |           |           |           | Catalyst(S,S)- <b>3</b>           |           |           |           |
| Coordinates                        |           |           |           | Coordinates                       |           |           |           |
| at. no.                            | x         | y         | z         | at. no.                           | x         | y         | z         |
| 6                                  | 3.400841  | -0.286515 | -0.327104 | 7                                 | -1.638904 | 1.033610  | 0.521241  |
| 6                                  | 2.358585  | 0.510600  | -0.613007 | 6                                 | -1.826035 | -0.324950 | 1.097666  |

---

|    |           |           |           |    |           |           |           |
|----|-----------|-----------|-----------|----|-----------|-----------|-----------|
| 1  | 3.398370  | -1.353727 | -0.576947 | 6  | -0.530365 | -0.984103 | 1.642729  |
| 1  | 4.297093  | 0.102382  | 0.165227  | 7  | 0.349931  | -1.463794 | 0.716471  |
| 1  | 2.400044  | 1.573303  | -0.340913 | 6  | 1.589774  | -2.136991 | 1.135514  |
| 6  | 1.086384  | 0.050070  | -1.270326 | 8  | -0.376892 | -1.129072 | 2.862522  |
| 1  | 0.782605  | 0.723405  | -2.094860 | 6  | 2.634524  | -2.068502 | 0.033171  |
| 1  | 1.192459  | -0.965684 | -1.693528 | 6  | 2.339192  | -2.481587 | -1.281382 |
| 14 | -0.372283 | -0.009946 | -0.076880 | 6  | 3.936597  | -1.621137 | 0.319599  |
| 17 | -2.100139 | -0.500540 | -1.112324 | 6  | 3.316426  | -2.432118 | -2.285060 |
| 17 | -0.067957 | -1.426043 | 1.397606  | 6  | 4.921413  | -1.585047 | -0.678094 |
| 17 | -0.651520 | 1.833326  | 0.825304  | 6  | 4.612215  | -1.985178 | -1.985989 |
|    |           |           |           | 6  | 1.298203  | -3.588893 | 1.565162  |
|    |           |           |           | 16 | -0.715482 | 1.332490  | -0.882789 |
|    |           |           |           | 8  | -0.435406 | 0.076008  | -1.642543 |
|    |           |           |           | 8  | -1.407619 | 2.454946  | -1.554837 |
|    |           |           |           | 6  | 0.850012  | 1.902784  | -0.214456 |
|    |           |           |           | 6  | 2.036594  | 1.485704  | -0.830650 |
|    |           |           |           | 6  | 0.865271  | 2.835403  | 0.834941  |
|    |           |           |           | 6  | 3.255239  | 2.005758  | -0.376337 |
|    |           |           |           | 6  | 2.091527  | 3.341656  | 1.272514  |
|    |           |           |           | 6  | 3.304932  | 2.936941  | 0.677022  |
|    |           |           |           | 6  | 4.623378  | 3.472354  | 1.182325  |
|    |           |           |           | 6  | -2.656287 | -1.296718 | 0.207334  |
|    |           |           |           | 6  | -4.042999 | -0.759691 | -0.075138 |
|    |           |           |           | 6  | -4.307826 | -0.015189 | -1.242477 |
|    |           |           |           | 6  | -5.086280 | -0.945352 | 0.854499  |
|    |           |           |           | 6  | -5.581151 | 0.526939  | -1.473476 |

---

---

|   |           |           |           |
|---|-----------|-----------|-----------|
| 6 | -6.359215 | -0.408329 | 0.623880  |
| 6 | -6.609949 | 0.331811  | -0.541671 |
| 1 | 0.228197  | -1.199520 | -0.267130 |
| 1 | 1.961908  | -1.592254 | 2.022390  |
| 1 | 1.334845  | -2.845567 | -1.527615 |
| 1 | 4.177687  | -1.293542 | 1.337289  |
| 1 | 3.065534  | -2.748966 | -3.302690 |
| 1 | 5.931087  | -1.238104 | -0.433255 |
| 1 | 5.377257  | -1.952112 | -2.768586 |
| 1 | 0.558577  | -3.586510 | 2.381417  |
| 1 | 0.902700  | -4.175993 | 0.718928  |
| 1 | 2.221398  | -4.075195 | 1.923138  |
| 1 | 2.005642  | 0.753787  | -1.641933 |
| 1 | -0.070743 | 3.139757  | 1.310543  |
| 1 | 4.185224  | 1.669284  | -0.846727 |
| 1 | 2.110242  | 4.063820  | 2.096423  |
| 1 | 5.434415  | 3.304967  | 0.455167  |
| 1 | 4.566721  | 4.554410  | 1.390778  |
| 1 | 4.916657  | 2.977274  | 2.126589  |
| 1 | -2.551636 | 1.472831  | 0.335341  |
| 1 | -2.400221 | -0.129462 | 2.018855  |
| 1 | -2.114843 | -1.480883 | -0.734530 |
| 1 | -2.722493 | -2.258211 | 0.748578  |
| 1 | -3.511422 | 0.128770  | -1.981688 |
| 1 | -4.896733 | -1.525931 | 1.765516  |
| 1 | -5.767515 | 1.100130  | -2.387603 |

---

|                                     |           |           |           | 1                                   | -7.158959 | -0.571097 | 1.354172  |
|-------------------------------------|-----------|-----------|-----------|-------------------------------------|-----------|-----------|-----------|
|                                     |           |           |           | 1                                   | -7.604814 | 0.751323  | -0.723591 |
| TS- <i>para</i> -fluoro( <i>S</i> ) |           |           |           | TS- <i>para</i> -fluoro( <i>R</i> ) |           |           |           |
| Coordinates                         |           |           |           | Coordinates                         |           |           |           |
| at. no.                             | x         | y         | z         | at. no.                             | x         | y         | z         |
| 6                                   | -6.462524 | -1.733493 | -0.551708 | 7                                   | 2.341973  | 1.160484  | 0.147312  |
| 6                                   | -5.558417 | -0.704784 | -0.213801 | 6                                   | 0.967277  | 1.454853  | -0.309228 |
| 6                                   | -5.806036 | 0.612409  | -0.658056 | 6                                   | 0.176221  | 0.155168  | -0.537768 |
| 6                                   | -6.938992 | 0.897972  | -1.422309 | 7                                   | 0.687127  | -0.746455 | -1.370392 |
| 6                                   | -7.819554 | -0.144467 | -1.739269 | 6                                   | 0.088958  | -2.072783 | -1.644058 |
| 6                                   | -7.599021 | -1.460877 | -1.317471 | 8                                   | -0.984968 | -0.053918 | -0.037308 |
| 6                                   | -4.344330 | -1.027422 | 0.566207  | 6                                   | 1.141634  | -3.149590 | -1.399036 |
| 8                                   | -3.390511 | -0.149706 | 0.567695  | 6                                   | 2.194228  | -3.371939 | -2.307889 |
| 14                                  | -1.864684 | -0.075197 | 1.607427  | 6                                   | 1.080216  | -3.920456 | -0.222476 |
| 17                                  | -1.661945 | -2.339390 | 1.534214  | 6                                   | 3.162415  | -4.351377 | -2.049626 |
| 17                                  | 0.052096  | 0.092999  | 2.720471  | 6                                   | 2.045850  | -4.905835 | 0.031864  |
| 17                                  | -2.081550 | 2.156297  | 1.437693  | 6                                   | 3.087718  | -5.124488 | -0.881537 |
| 6                                   | -3.005910 | -0.145556 | 3.319477  | 6                                   | -0.519845 | -2.093037 | -3.054364 |
| 6                                   | -4.061743 | -1.123063 | 3.191334  | 16                                  | 3.700482  | 0.986594  | -0.843241 |
| 6                                   | -5.258215 | -0.881284 | 2.541691  | 8                                   | 3.186140  | 0.315184  | -2.079129 |
| 1                                   | -6.268216 | -2.758161 | -0.215108 | 8                                   | 4.507999  | 2.215627  | -1.002568 |
| 1                                   | -8.308957 | -2.243875 | -1.596058 | 6                                   | 4.669109  | -0.163796 | 0.139844  |
| 1                                   | -7.149831 | 1.908777  | -1.781395 | 6                                   | 6.012067  | 0.146703  | 0.393950  |

---

|    |           |           |           |   |           |           |           |
|----|-----------|-----------|-----------|---|-----------|-----------|-----------|
| 1  | -5.090676 | 1.399869  | -0.402087 | 6 | 4.105300  | -1.373707 | 0.575064  |
| 1  | -2.258915 | -0.403983 | 4.082252  | 6 | 6.794948  | -0.769119 | 1.107040  |
| 1  | -3.358052 | 0.889607  | 3.428583  | 6 | 4.905646  | -2.273439 | 1.283605  |
| 1  | -3.821933 | -2.160843 | 3.455944  | 6 | 6.257885  | -1.987306 | 1.564844  |
| 1  | -6.028792 | -1.656442 | 2.482395  | 6 | 7.098451  | -2.955238 | 2.362242  |
| 1  | -5.597723 | 0.147262  | 2.380034  | 6 | 0.792169  | 2.412333  | -1.522972 |
| 1  | -4.079482 | -2.092036 | 0.675357  | 6 | 1.290497  | 3.823431  | -1.266509 |
| 7  | 2.292836  | 1.223430  | 0.245330  | 6 | 2.358123  | 4.353526  | -2.012717 |
| 6  | 0.898613  | 1.491658  | -0.169198 | 6 | 0.672234  | 4.636788  | -0.295573 |
| 6  | 0.167199  | 0.187438  | -0.533146 | 6 | 2.801390  | 5.665951  | -1.795961 |
| 7  | 0.725993  | -0.608039 | -1.438848 | 6 | 1.117130  | 5.946760  | -0.075967 |
| 6  | 0.191812  | -1.926452 | -1.847670 | 6 | 2.183014  | 6.466259  | -0.826233 |
| 8  | -0.993890 | -0.114375 | -0.077340 | 1 | 1.608698  | -0.518599 | -1.789087 |
| 6  | 1.286797  | -2.976298 | -1.681612 | 1 | -0.715466 | -2.190320 | -0.901101 |
| 6  | 2.359578  | -3.077529 | -2.588584 | 1 | 2.268832  | -2.774170 | -3.223178 |
| 6  | 1.242560  | -3.848608 | -0.577315 | 1 | 0.274317  | -3.735100 | 0.497191  |
| 6  | 3.362851  | -4.037451 | -2.399712 | 1 | 3.976622  | -4.511354 | -2.763875 |
| 6  | 2.243329  | -4.813763 | -0.392599 | 1 | 1.979017  | -5.505385 | 0.945950  |
| 6  | 3.304842  | -4.911551 | -1.304107 | 1 | 3.840229  | -5.895463 | -0.684893 |
| 6  | -0.391677 | -1.838823 | -3.266043 | 1 | -1.312857 | -1.331651 | -3.135500 |
| 16 | 3.647325  | 1.212802  | -0.768068 | 1 | 0.234584  | -1.889872 | -3.833361 |
| 8  | 3.156699  | 0.629354  | -2.057283 | 1 | -0.961215 | -3.082857 | -3.255979 |
| 8  | 4.389611  | 2.491137  | -0.819903 | 1 | 6.424496  | 1.094527  | 0.037896  |
| 6  | 4.682015  | 0.029221  | 0.101586  | 1 | 3.055888  | -1.607217 | 0.376537  |
| 6  | 6.021839  | 0.366145  | 0.336181  | 1 | 7.844673  | -0.532009 | 1.312391  |
| 6  | 4.171410  | -1.227266 | 0.465755  | 1 | 4.467967  | -3.218989 | 1.621084  |

---

---

|   |           |           |           |    |           |           |           |
|---|-----------|-----------|-----------|----|-----------|-----------|-----------|
| 6 | 6.857322  | -0.572480 | 0.954249  | 1  | 8.175545  | -2.791687 | 2.194899  |
| 6 | 5.023499  | -2.148779 | 1.079057  | 1  | 6.911501  | -2.839091 | 3.445948  |
| 6 | 6.375775  | -1.838821 | 1.335674  | 1  | 6.863712  | -4.001874 | 2.105082  |
| 6 | 7.273800  | -2.838151 | 2.024322  | 1  | 2.578308  | 1.599656  | 1.041643  |
| 6 | 0.661859  | 2.564482  | -1.271319 | 1  | 0.487664  | 1.932331  | 0.557130  |
| 6 | 1.102807  | 3.961162  | -0.870491 | 1  | 1.287125  | 1.984731  | -2.410566 |
| 6 | 2.125774  | 4.619924  | -1.575840 | 1  | -0.294253 | 2.434447  | -1.731517 |
| 6 | 0.476769  | 4.632942  | 0.198906  | 1  | 2.854039  | 3.728872  | -2.762506 |
| 6 | 2.516828  | 5.919623  | -1.223852 | 1  | -0.169798 | 4.241496  | 0.284090  |
| 6 | 0.869919  | 5.929805  | .553392   | 1  | 3.636160  | 6.059693  | -2.385184 |
| 6 | 1.890882  | 6.578545  | -0.157392 | 1  | 0.623951  | 6.566076  | 0.680837  |
| 1 | 1.637897  | -0.300363 | -1.827125 | 1  | 2.529104  | 7.491136  | -0.655081 |
| 1 | -0.618584 | -2.147033 | -1.135119 | 6  | -6.632033 | 0.649672  | -0.763546 |
| 1 | 2.422909  | -2.400829 | -3.448096 | 6  | -5.586107 | -0.138387 | -0.239670 |
| 1 | 0.420546  | -3.759884 | 0.142127  | 6  | -5.617193 | -1.539182 | -0.412963 |
| 1 | 4.191788  | -4.102718 | -3.111981 | 6  | -6.676381 | -2.142567 | -1.093785 |
| 1 | 2.188915  | -5.492153 | 0.465466  | 6  | -7.701524 | -1.333287 | -1.600546 |
| 1 | 4.085479  | -5.666513 | -1.162720 | 6  | -7.696653 | 0.058142  | -1.448530 |
| 1 | -1.213056 | -1.104143 | -3.293040 | 6  | -4.453432 | 0.518292  | 0.448301  |
| 1 | 0.366955  | -1.534488 | -4.007129 | 8  | -3.371225 | -0.178137 | 0.606685  |
| 1 | -0.788865 | -2.821865 | -3.567878 | 14 | -1.870550 | 0.202291  | 1.617832  |
| 1 | 6.391310  | 1.351971  | 0.041432  | 17 | -1.674715 | -2.017829 | 1.866587  |
| 1 | 3.121840  | -1.477351 | 0.289456  | 17 | 0.022625  | 0.549631  | 2.733228  |
| 1 | 7.904987  | -0.314783 | 1.144660  | 17 | -2.060352 | 2.413705  | 1.112460  |
| 1 | 4.627333  | -3.130240 | 1.360936  | 6  | -3.045276 | 0.391936  | 3.299447  |
| 1 | 7.044081  | -2.897768 | 3.104131  | 6  | -4.238189 | 1.151283  | 3.007715  |

---

|                                      |           |           |           |                                      |           |           |           |
|--------------------------------------|-----------|-----------|-----------|--------------------------------------|-----------|-----------|-----------|
| 1                                    | 7.139522  | -3.852497 | 1.610980  | 6                                    | -5.368587 | 0.610172  | 2.422486  |
| 1                                    | 8.336766  | -2.564630 | 1.926000  | 1                                    | -6.605357 | 1.737998  | -0.638129 |
| 1                                    | 2.521636  | 1.614085  | 1.164014  | 1                                    | -8.513350 | 0.650908  | -1.868417 |
| 1                                    | 0.405843  | 1.849474  | 0.746678  | 1                                    | -6.721068 | -3.224565 | -1.243809 |
| 1                                    | 1.162601  | 2.256136  | -2.204230 | 1                                    | -4.793826 | -2.139237 | -0.013709 |
| 1                                    | -0.427640 | 2.559375  | -1.464353 | 1                                    | -4.362599 | 1.611773  | 0.341070  |
| 1                                    | 2.628851  | 4.106582  | -0.401788 | 1                                    | -3.231340 | -0.651805 | 3.588477  |
| 1                                    | -0.330547 | 4.138683  | 0.751279  | 1                                    | -2.363613 | 0.893470  | 3.999613  |
| 1                                    | 3.317379  | 6.414134  | -1.783966 | 1                                    | -6.249223 | 1.230848  | 2.228819  |
| 1                                    | 0.370546  | 6.437310  | 1.385631  | 1                                    | -5.541849 | -0.470470 | 2.460453  |
| 1                                    | 2.196282  | 7.593239  | 0.119305  | 1                                    | -4.170110 | 2.244320  | 3.078685  |
| 9                                    | -8.915229 | 0.127795  | -2.480960 | 9                                    | -8.726204 | -1.913826 | -2.262324 |
| TS- <i>para</i> -methoxy( <i>R</i> ) |           |           |           | TS- <i>para</i> -methoxy( <i>S</i> ) |           |           |           |
| Coordinates                          |           |           |           | Coordinates                          |           |           |           |
| at. no.                              | x         | y         | z         | at. no.                              | x         | y         | z         |
| 7                                    | 2.341973  | 1.160484  | 0.147312  | 6                                    | -6.243828 | -1.920516 | -0.272548 |
| 6                                    | 0.967277  | 1.454853  | -0.309228 | 6                                    | -5.343379 | -0.880227 | 0.050729  |
| 6                                    | 0.176221  | 0.155168  | -0.537768 | 6                                    | -5.642012 | 0.431693  | -0.365975 |
| 7                                    | 0.687127  | -0.746455 | -1.370392 | 6                                    | -6.807579 | 0.707985  | -1.086043 |
| 6                                    | 0.088958  | -2.072783 | -1.644058 | 6                                    | -7.699803 | -0.339229 | -1.400324 |
| 8                                    | -0.984968 | -0.053918 | -0.037308 | 6                                    | -7.406405 | -1.658817 | -0.990048 |
| 6                                    | 1.141634  | -3.149590 | -1.399036 | 6                                    | -4.103594 | -1.184670 | 0.793661  |
| 6                                    | 2.194228  | -3.371939 | -2.307889 | 8                                    | -3.161875 | -0.282692 | 0.765464  |
| 6                                    | 1.080216  | -3.920456 | -0.222476 | 14                                   | -1.610621 | -0.190460 | 1.733534  |
| 6                                    | 3.162415  | -4.351377 | -2.049626 | 17                                   | -1.345130 | -2.445855 | 1.614274  |
| 6                                    | 2.045850  | -4.905835 | 0.031864  | 17                                   | 0.347568  | 0.008541  | 2.779558  |

---

|    |           |           |           |    |            |           |           |
|----|-----------|-----------|-----------|----|------------|-----------|-----------|
| 6  | 3.087718  | -5.124488 | -0.881537 | 17 | -1.877694  | 2.041517  | 1.620155  |
| 6  | -0.519845 | -2.093037 | -3.054364 | 6  | -2.669583  | -0.318253 | 3.503499  |
| 16 | 3.700482  | 0.986594  | -0.843241 | 6  | -3.699776  | -1.319617 | 3.387469  |
| 8  | 3.186140  | 0.315184  | -2.079129 | 6  | -4.913663  | -1.099547 | 2.754690  |
| 8  | 4.507999  | 2.215627  | -1.002568 | 1  | -6.019834  | -2.947112 | 0.040006  |
| 6  | 4.669109  | -0.163796 | 0.139844  | 1  | -8.107871  | -2.455425 | -1.253383 |
| 6  | 6.012067  | 0.146703  | 0.393950  | 8  | -8.863863  | -0.187416 | -2.095067 |
| 6  | 4.105300  | -1.373707 | 0.575064  | 1  | -7.011754  | 1.733571  | -1.402661 |
| 6  | 6.794948  | -0.769119 | 1.107040  | 1  | -4.937768  | 1.234267  | -0.125522 |
| 6  | 4.905646  | -2.273439 | 1.283605  | 1  | -1.884025  | -0.569561 | 4.228312  |
| 6  | 6.257885  | -1.987306 | 1.564844  | 1  | -3.041840  | 0.706708  | 3.638588  |
| 6  | 7.098451  | -2.955238 | 2.362242  | 1  | -3.426274  | -2.355291 | 3.626396  |
| 6  | 0.792169  | 2.412333  | -1.522972 | 1  | -5.668445  | -1.891320 | 2.712916  |
| 6  | 1.290497  | 3.823431  | -1.266509 | 1  | -5.289078  | -0.077181 | 2.640055  |
| 6  | 2.358123  | 4.353526  | -2.012717 | 1  | -3.803605  | -2.244143 | 0.853105  |
| 6  | 0.672234  | 4.636788  | -0.295573 | 6  | -9.212306  | 1.128545  | -2.526554 |
| 6  | 2.801390  | 5.665951  | -1.795961 | 1  | -10.174820 | 1.024218  | -3.047041 |
| 6  | 1.117130  | 5.946760  | -0.075967 | 1  | -9.330208  | 1.817660  | -1.669614 |
| 6  | 2.183014  | 6.466259  | -0.826233 | 1  | -8.459473  | 1.539081  | -3.225164 |
| 1  | 1.608698  | -0.518599 | -1.789087 | 7  | 2.468135   | 1.238642  | 0.236886  |
| 1  | -0.715466 | -2.190320 | -0.901101 | 6  | 1.050370   | 1.482496  | -0.107606 |
| 1  | 2.268832  | -2.774170 | -3.223178 | 6  | 0.337255   | 0.169518  | -0.476744 |
| 1  | 0.274317  | -3.735100 | 0.497191  | 7  | 0.880414   | -0.585378 | -1.426708 |
| 1  | 3.976622  | -4.511354 | -2.763875 | 6  | 0.367402   | -1.907799 | -1.848040 |
| 1  | 1.979017  | -5.505385 | 0.945950  | 8  | -0.794665  | -0.175787 | 0.016758  |
| 1  | 3.840229  | -5.895463 | -0.684893 | 6  | 1.488584   | -2.936263 | -1.724717 |

---



---

|   |           |           |           |    |           |           |           |
|---|-----------|-----------|-----------|----|-----------|-----------|-----------|
| 1 | -1.312857 | -1.331651 | -3.135500 | 6  | 2.537146  | -3.008736 | -2.662331 |
| 1 | 0.234584  | -1.889872 | -3.833361 | 6  | 1.493362  | -3.817881 | -0.626839 |
| 1 | -0.961215 | -3.082857 | -3.255979 | 6  | 3.563599  | -3.950746 | -2.510521 |
| 1 | 6.424496  | 1.094527  | 0.037896  | 6  | 2.517504  | -4.764465 | -0.478731 |
| 1 | 3.055888  | -1.607217 | 0.376537  | 6  | 3.553801  | -4.834829 | -1.421292 |
| 1 | 7.844673  | -0.532009 | 1.312391  | 6  | -0.250288 | -1.808441 | -3.250956 |
| 1 | 4.467967  | -3.218989 | 1.621084  | 16 | 3.775119  | 1.304453  | -0.834048 |
| 1 | 8.175545  | -2.791687 | 2.194899  | 8  | 3.247329  | 0.740963  | -2.117405 |
| 1 | 6.911501  | -2.839091 | 3.445948  | 8  | 4.472768  | 2.608031  | -0.879927 |
| 1 | 6.863712  | -4.001874 | 2.105082  | 6  | 4.887093  | 0.132331  | -0.047590 |
| 1 | 2.578308  | 1.599656  | 1.041643  | 6  | 6.218899  | 0.517481  | 0.156403  |
| 1 | 0.487664  | 1.932331  | 0.557130  | 6  | 4.443016  | -1.159021 | 0.280387  |
| 1 | 1.287125  | 1.984731  | -2.410566 | 6  | 7.114706  | -0.407704 | 0.706218  |
| 1 | -0.294253 | 2.434447  | -1.731517 | 6  | 5.354757  | -2.066341 | 0.825587  |
| 1 | 2.854039  | 3.728872  | -2.762506 | 6  | 6.700887  | -1.708407 | 1.049736  |
| 1 | -0.169798 | 4.241496  | 0.284090  | 6  | 7.664199  | -2.694340 | 1.665637  |
| 1 | 3.636160  | 6.059693  | -2.385184 | 6  | 0.736129  | 2.576726  | -1.168009 |
| 1 | 0.623951  | 6.566076  | 0.680837  | 6  | 1.160904  | 3.974926  | -0.755269 |
| 1 | 2.529104  | 7.491136  | -0.655081 | 6  | 2.112549  | 4.684546  | -1.509650 |
| 6 | -6.632033 | 0.649672  | -0.763546 | 6  | 0.588535  | 4.598832  | 0.371583  |
| 6 | -5.586107 | -0.138387 | -0.239670 | 6  | 2.486949  | 5.986792  | -1.149424 |
| 6 | -5.617193 | -1.539182 | -0.412963 | 6  | 0.965441  | 5.898338  | 0.734278  |
| 6 | -6.676381 | -2.142567 | -1.093785 | 6  | 1.915617  | 6.597528  | -0.025207 |
| 6 | -7.701524 | -1.333287 | -1.600546 | 1  | 1.765693  | -0.240720 | -1.843985 |
| 6 | -7.696653 | 0.058142  | -1.448530 | 1  | -0.421407 | -2.159312 | -1.121623 |
| 6 | -4.453432 | 0.518292  | 0.448301  | 1  | 2.562444  | -2.323468 | -3.516928 |

---

---

|    |           |           |           |   |           |           |           |
|----|-----------|-----------|-----------|---|-----------|-----------|-----------|
| 8  | -3.371225 | -0.178137 | 0.606685  | 1 | 0.691661  | -3.750550 | 0.117433  |
| 14 | -1.870550 | 0.202291  | 1.617832  | 1 | 4.372807  | -3.994096 | -3.246792 |
| 17 | -1.674715 | -2.017829 | 1.866587  | 1 | 2.501117  | -5.449987 | 0.375208  |
| 17 | 0.022625  | 0.549631  | 2.733228  | 1 | 4.352274  | -5.576011 | -1.309246 |
| 17 | -2.060352 | 2.413705  | 1.112460  | 1 | -1.088304 | -1.092377 | -3.245908 |
| 6  | -3.045276 | 0.391936  | 3.299447  | 1 | 0.484148  | -1.473779 | -4.003248 |
| 6  | -4.238189 | 1.151283  | 3.007715  | 1 | -0.632457 | -2.794638 | -3.561812 |
| 6  | -5.368587 | 0.610172  | 2.422486  | 1 | 6.535544  | 1.529359  | -0.110163 |
| 1  | -6.605357 | 1.737998  | -0.638129 | 1 | 3.399789  | -1.449340 | 0.128181  |
| 1  | -8.513350 | 0.650908  | -1.868417 | 1 | 8.156655  | -0.112206 | 0.871637  |
| 1  | -6.721068 | -3.224565 | -1.243809 | 1 | 5.010474  | -3.074849 | 1.078681  |
| 1  | -4.793826 | -2.139237 | -0.013709 | 1 | 7.485581  | -2.795414 | 2.752041  |
| 1  | -4.362599 | 1.611773  | 0.341070  | 1 | 7.548158  | -3.699783 | 1.226014  |
| 1  | -3.231340 | -0.651805 | 3.588477  | 1 | 8.711181  | -2.378244 | 1.530073  |
| 1  | -2.363613 | 0.893470  | 3.999613  | 1 | 2.726249  | 1.601188  | 1.159302  |
| 1  | -6.249223 | 1.230848  | 2.228819  | 1 | 0.590681  | 1.802302  | 0.838811  |
| 1  | -5.541849 | -0.470470 | 2.460453  | 1 | 1.198582  | 2.304986  | -2.131519 |
| 1  | -4.170110 | 2.244320  | 3.078685  | 1 | -0.361103 | 2.547747  | -1.308317 |
| 9  | -8.726204 | -1.913826 | -2.262324 | 1 | 2.571697  | 4.209267  | -2.382699 |
| 1  | -1.949207 | 1.093878  | 4.134318  | 1 | -0.165271 | 4.065641  | 0.962032  |
| 1  | -5.888927 | 1.461514  | 2.488845  | 1 | 3.231802  | 6.521184  | -1.748420 |
| 1  | -5.209214 | -0.245043 | 2.744745  | 1 | 0.508585  | 6.368301  | 1.611776  |
| 1  | -3.767147 | 2.455191  | 3.253682  | 1 | 2.208214  | 7.614121  | 0.258410  |

---

| TS- <i>ortho</i> -fluoro( <i>R</i> ) |           |           |           | TS- <i>ortho</i> -fluoro( <i>S</i> ) |           |           |           |
|--------------------------------------|-----------|-----------|-----------|--------------------------------------|-----------|-----------|-----------|
| Coordinates                          |           |           |           | Coordinates                          |           |           |           |
| at. no.                              | x         | y         | z         | at. no.                              | x         | y         | z         |
| 7                                    | 2.236123  | 1.206038  | 0.177850  | 6                                    | -6.636142 | -1.302818 | -0.697180 |
| 6                                    | 0.853259  | 1.433888  | -0.295084 | 6                                    | -5.600746 | -0.368163 | -0.500228 |
| 6                                    | 0.145011  | 0.096748  | -0.574330 | 6                                    | -5.687550 | 0.864058  | -1.184202 |
| 7                                    | 0.732525  | -0.757263 | -1.406556 | 6                                    | -6.766166 | 1.133035  | -2.031088 |
| 6                                    | 0.228887  | -2.115302 | -1.713075 | 6                                    | -7.778278 | 0.174405  | -2.210867 |
| 8                                    | -1.017026 | -0.187900 | -0.115244 | 6                                    | -7.719077 | -1.055236 | -1.539064 |
| 6                                    | 1.343485  | -3.122652 | -1.446121 | 6                                    | -4.440777 | -0.699849 | 0.349852  |
| 6                                    | 2.426429  | -3.278346 | -2.332960 | 8                                    | -3.459771 | 0.139273  | 0.355114  |
| 6                                    | 1.309573  | -3.892005 | -0.267312 | 14                                   | -1.989417 | 0.215355  | 1.498070  |
| 6                                    | 3.452228  | -4.190190 | -2.050233 | 17                                   | -1.883367 | -2.051629 | 1.567330  |
| 6                                    | 2.332980  | -4.810111 | 0.011290  | 17                                   | -0.139180 | 0.376528  | 2.715942  |
| 6                                    | 3.405781  | -4.961852 | -0.879767 | 17                                   | -2.082949 | 2.433833  | 1.156604  |
| 6                                    | -0.336112 | -2.156553 | -3.140729 | 6                                    | -3.242913 | 0.306475  | 3.116686  |
| 16                                   | 3.617925  | 1.154024  | -0.798201 | 6                                    | -4.332516 | -0.640130 | 2.993303  |
| 8                                    | 3.178418  | 0.452116  | -2.045667 | 6                                    | -5.499156 | -0.389522 | 2.302265  |
| 8                                    | 4.324547  | 2.446107  | -0.938254 | 1                                    | -8.493953 | -1.817657 | -1.653687 |
| 6                                    | 4.658200  | 0.078621  | 0.196055  | 1                                    | -6.818680 | 2.090074  | -2.558378 |
| 6                                    | 5.951817  | 0.512625  | 0.514775  | 1                                    | -4.883097 | 1.590444  | -1.034594 |
| 6                                    | 4.197160  | -1.189226 | 0.586111  | 1                                    | -2.559535 | 0.074512  | 3.945630  |
| 6                                    | 6.789181  | -0.336972 | 1.248390  | 1                                    | -3.562932 | 1.357769  | 3.141253  |
| 6                                    | 5.050507  | -2.020631 | 1.315574  | 1                                    | -4.141334 | -1.670401 | 3.319500  |
| 6                                    | 6.355056  | -1.610247 | 1.662297  | 1                                    | -6.280811 | -1.151392 | 2.226355  |
| 6                                    | 7.250956  | -2.510563 | 2.478338  | 1                                    | -5.785223 | 0.637573  | 2.052592  |

---

|   |           |           |           |    |           |           |           |
|---|-----------|-----------|-----------|----|-----------|-----------|-----------|
| 6 | 0.643253  | 2.416757  | -1.482145 | 1  | -4.240217 | -1.758788 | 0.568426  |
| 6 | 1.031815  | 3.850451  | -1.166129 | 7  | 2.317125  | 1.129999  | 0.263187  |
| 6 | 2.052605  | 4.493263  | -1.888916 | 6  | 0.964037  | 1.498737  | -0.207833 |
| 6 | 0.355589  | 4.572154  | -0.161864 | 6  | 0.150298  | 0.244506  | -0.570250 |
| 6 | 2.392267  | 5.826377  | -1.617715 | 7  | 0.672229  | -0.604493 | -1.450353 |
| 6 | 0.697616  | 5.902499  | 0.112458  | 6  | 0.055537  | -1.891980 | -1.840754 |
| 6 | 1.716722  | 6.535059  | -0.615275 | 8  | -1.033750 | 0.024867  | -0.132262 |
| 1 | 1.650319  | -0.468584 | -1.794943 | 6  | 1.079920  | -3.006501 | -1.652852 |
| 1 | -0.587113 | -2.294718 | -0.995368 | 6  | 2.159341  | -3.171544 | -2.542247 |
| 1 | 2.479915  | -2.680993 | -3.249947 | 6  | 0.966897  | -3.872005 | -0.548162 |
| 1 | 0.479014  | -3.757326 | 0.435320  | 6  | 3.102850  | -4.186625 | -2.336048 |
| 1 | 4.289534  | -4.298349 | -2.747317 | 6  | 1.907435  | -4.893194 | -0.346432 |
| 1 | 2.287535  | -5.409174 | 0.926991  | 6  | 2.976489  | -5.053376 | -1.240317 |
| 1 | 4.204072  | -5.679918 | -0.664124 | 6  | -0.516496 | -1.792130 | -3.263196 |
| 1 | -1.175848 | -1.448718 | -3.235585 | 16 | 3.702177  | 1.006267  | -0.702023 |
| 1 | 0.424335  | -1.891554 | -3.894870 | 8  | 3.217093  | 0.427253  | -1.994957 |
| 1 | -0.703656 | -3.170794 | -3.367601 | 8  | 4.529635  | 2.231262  | -0.752417 |
| 1 | 6.284775  | 1.502866  | 0.192540  | 6  | 4.625668  | -0.224585 | 0.226054  |
| 1 | 3.184807  | -1.520161 | 0.338509  | 6  | 5.956101  | 0.056904  | 0.563460  |
| 1 | 7.800500  | -0.002497 | 1.504568  | 6  | 4.039449  | -1.462046 | 0.538452  |
| 1 | 4.692790  | -3.010405 | 1.619038  | 6  | 6.703669  | -0.917259 | 1.237039  |
| 1 | 7.189614  | -3.557924 | 2.136719  | 6  | 4.804333  | -2.419405 | 1.208709  |
| 1 | 8.304601  | -2.192014 | 2.424974  | 6  | 6.143642  | -2.164121 | 1.572186  |
| 1 | 6.954896  | -2.501402 | 3.543598  | 6  | 6.944578  | -3.201249 | 2.322062  |
| 1 | 2.433710  | 1.651796  | 1.078684  | 6  | 0.849683  | 2.563506  | -1.336050 |
| 1 | 0.333692  | 1.854904  | 0.577433  | 6  | 1.381350  | 3.929893  | -0.940525 |

---

---

|    |           |           |           |   |           |           |           |
|----|-----------|-----------|-----------|---|-----------|-----------|-----------|
| 1  | 1.192396  | 2.054747  | -2.367329 | 6 | 2.467635  | 4.503187  | -1.625343 |
| 1  | -0.435794 | 2.370347  | -1.723135 | 6 | 0.776552  | 4.659476  | 0.102881  |
| 1  | 2.594495  | 3.941398  | -2.663815 | 6 | 2.941641  | 5.776410  | -1.278505 |
| 1  | -0.452516 | 4.091056  | 0.401081  | 6 | 1.252534  | 5.929640  | 0.452447  |
| 1  | 3.191850  | 6.308181  | -2.190161 | 6 | 2.336286  | 6.493232  | -0.237691 |
| 1  | 0.159601  | 6.448673  | 0.894620  | 1 | 1.614241  | -0.370661 | -1.816835 |
| 1  | 1.982190  | 7.575855  | -0.401506 | 1 | -0.770263 | -2.048592 | -1.129056 |
| 6  | -6.766494 | 0.030640  | -0.864320 | 1 | 2.274680  | -2.500898 | -3.401041 |
| 6  | -5.584686 | -0.625456 | -0.467704 | 1 | 0.139639  | -3.733862 | 0.157707  |
| 6  | -5.434813 | -1.983168 | -0.824697 | 1 | 3.938506  | -4.300862 | -3.034093 |
| 6  | -6.430030 | -2.641566 | -1.552109 | 1 | 1.800265  | -5.565746 | 0.511248  |
| 6  | -7.593784 | -1.954385 | -1.938237 | 1 | 3.709887  | -5.851628 | -1.084687 |
| 6  | -7.769675 | -0.606788 | -1.592644 | 1 | -1.286057 | -1.004071 | -3.306825 |
| 6  | -4.522722 | 0.108708  | 0.248445  | 1 | 0.263713  | -1.553663 | -4.005909 |
| 8  | -3.403933 | -0.510575 | 0.431999  | 1 | -0.978484 | -2.751474 | -3.548734 |
| 14 | -1.968178 | -0.033805 | 1.518128  | 1 | 6.386483  | 1.027264  | 0.301944  |
| 17 | -1.613100 | -2.240546 | 1.724916  | 1 | 2.999517  | -1.672472 | 0.274853  |
| 17 | -0.146520 | 0.424682  | 2.705691  | 1 | 7.743239  | -0.703502 | 1.508669  |
| 17 | -2.303704 | 2.160790  | 1.040749  | 1 | 4.349754  | -3.385992 | 1.451032  |
| 6  | -3.218974 | 0.023497  | 3.142916  | 1 | 8.020405  | -2.962591 | 2.321659  |
| 6  | -4.457474 | 0.704631  | 2.829940  | 1 | 6.618194  | -3.266218 | 3.376336  |
| 6  | -5.543681 | 0.096027  | 2.235617  | 1 | 6.814630  | -4.205563 | 1.883460  |
| 1  | -8.665679 | -0.047080 | -1.873230 | 1 | 2.541618  | 1.517874  | 1.184272  |
| 1  | -6.299328 | -3.692792 | -1.825341 | 1 | 0.468549  | 1.911825  | 0.682686  |
| 1  | -4.516455 | -2.494148 | -0.520586 | 1 | 1.356497  | 2.201184  | -2.245926 |
| 1  | -4.521142 | 1.206812  | 0.191347  | 1 | -0.229827 | 2.637898  | -1.567086 |

---

|   |           |           |           |   |           |           |           |
|---|-----------|-----------|-----------|---|-----------|-----------|-----------|
| 1 | -3.343397 | -1.035921 | 3.407806  | 1 | 2.954461  | 3.942039  | -2.429607 |
| 1 | -2.604858 | 0.554913  | 3.883320  | 1 | -0.080125 | 4.232402  | 0.636751  |
| 1 | -6.447001 | 0.667238  | 2.001168  | 1 | 3.790560  | 6.204435  | -1.821911 |
| 1 | -5.638404 | -0.994837 | 2.243121  | 1 | 0.768923  | 6.483586  | 1.264100  |
| 1 | -4.462549 | 1.799305  | 2.907608  | 1 | 2.706691  | 7.487144  | 0.035085  |
| 1 | -8.372581 | -2.467980 | -2.510529 | 1 | -8.622145 | 0.382422  | -2.876041 |
| 9 | -6.941367 | 1.326593  | -0.500608 | 9 | -6.585011 | -2.478469 | -0.020078 |

| TS- <i>ortho</i> -methoxy( <i>R</i> ) |           |           |           | TS- <i>ortho</i> -methoxy( <i>S</i> ) |           |           |           |
|---------------------------------------|-----------|-----------|-----------|---------------------------------------|-----------|-----------|-----------|
| Coordinates                           |           |           |           | Coordinates                           |           |           |           |
| at. no.                               | x         | y         | z         | at. no.                               | x         | y         | z         |
| 7                                     | 2.353925  | 1.248445  | 0.183133  | 6                                     | -6.508858 | -0.854906 | -0.669459 |
| 6                                     | 0.958167  | 1.430241  | -0.270608 | 6                                     | -5.433538 | 0.058710  | -0.482225 |
| 6                                     | 0.298701  | 0.071029  | -0.564450 | 6                                     | -5.426916 | 1.265109  | -1.208708 |
| 7                                     | 0.908693  | -0.742682 | -1.421534 | 6                                     | -6.450714 | 1.565572  | -2.111933 |
| 6                                     | 0.455305  | -2.113107 | -1.749571 | 6                                     | -7.497297 | 0.650480  | -2.298328 |
| 8                                     | -0.843981 | -0.266754 | -0.095467 | 6                                     | -7.532531 | -0.556762 | -1.585186 |
| 6                                     | 1.604115  | -3.084450 | -1.491889 | 6                                     | -4.315659 | -0.284615 | 0.419995  |
| 6                                     | 2.674446  | -3.225063 | -2.396184 | 8                                     | -3.272010 | 0.489636  | 0.380607  |
| 6                                     | 1.613810  | -3.835156 | -0.300386 | 14                                    | -1.815635 | 0.515314  | 1.511404  |
| 6                                     | 3.729503  | -4.104974 | -2.118932 | 17                                    | -1.859345 | -1.745823 | 1.705448  |
| 6                                     | 2.666374  | -4.721053 | -0.027083 | 17                                    | 0.039837  | 0.601055  | 2.743883  |
| 6                                     | 3.725930  | -4.858998 | -0.936197 | 17                                    | -1.724336 | 2.713955  | 1.060404  |
| 6                                     | -0.105603 | -2.152371 | -3.178621 | 6                                     | -3.055006 | 0.786277  | 3.131038  |

---

|    |           |           |           |    |           |           |           |
|----|-----------|-----------|-----------|----|-----------|-----------|-----------|
| 16 | 3.726625  | 1.268514  | -0.804561 | 6  | -4.205109 | -0.082797 | 3.035233  |
| 8  | 3.304326  | 0.571334  | -2.060505 | 6  | -5.327177 | 0.205401  | 2.280352  |
| 8  | 4.381175  | 2.589544  | -0.928213 | 1  | -8.359528 | -1.253035 | -1.742721 |
| 6  | 4.819027  | 0.218898  | 0.161373  | 1  | -6.429950 | 2.504036  | -2.673560 |
| 6  | 6.097108  | 0.699528  | 0.475912  | 1  | -4.587825 | 1.949478  | -1.051377 |
| 6  | 4.413974  | -1.073695 | 0.531774  | 1  | -2.392473 | 0.548392  | 3.974284  |
| 6  | 6.976016  | -0.128801 | 1.184705  | 1  | -3.293327 | 1.858411  | 3.089686  |
| 6  | 5.308093  | -1.883191 | 1.236715  | 1  | -4.098676 | -1.103227 | 3.425060  |
| 6  | 6.598471  | -1.426517 | 1.577986  | 1  | -6.166167 | -0.495474 | 2.240372  |
| 6  | 7.539431  | -2.304292 | 2.367531  | 1  | -5.535199 | 1.237899  | 1.980717  |
| 6  | 0.696489  | 2.419888  | -1.441234 | 1  | -4.174569 | -1.343115 | 0.679863  |
| 6  | 1.032644  | 3.864019  | -1.113663 | 7  | 2.564675  | 0.989647  | 0.242855  |
| 6  | 2.015797  | 4.553946  | -1.845253 | 6  | 1.245668  | 1.481861  | -0.213777 |
| 6  | 0.345198  | 4.548370  | -0.091056 | 6  | 0.322058  | 0.303301  | -0.567862 |
| 6  | 2.308061  | 5.896322  | -1.564999 | 7  | 0.757065  | -0.574799 | -1.469441 |
| 6  | 0.639808  | 5.888281  | 0.192082  | 6  | 0.029742  | -1.799430 | -1.868946 |
| 6  | 1.621813  | 6.567777  | -0.544467 | 8  | -0.861666 | 0.170058  | -0.101028 |
| 1  | 1.810166  | -0.411714 | -1.813779 | 6  | 0.916815  | -3.014099 | -1.605343 |
| 1  | -0.355467 | -2.331970 | -1.036798 | 6  | 1.925637  | -3.411839 | -2.503623 |
| 1  | 2.694575  | -2.642734 | -3.324011 | 6  | 0.743692  | -3.738736 | -0.409834 |
| 1  | 0.793113  | -3.711142 | 0.415797  | 6  | 2.740019  | -4.515988 | -2.216039 |
| 1  | 4.555941  | -4.202219 | -2.830523 | 6  | 1.554996  | -4.846542 | -0.125274 |
| 1  | 2.653594  | -5.306580 | 0.898402  | 6  | 2.554346  | -5.238877 | -1.028478 |
| 1  | 4.546903  | -5.552536 | -0.725265 | 6  | -0.462090 | -1.664610 | -3.317389 |
| 1  | -0.972156 | -1.476302 | -3.262453 | 16 | 3.926155  | 0.765065  | -0.737472 |
| 1  | 0.644212  | -1.844472 | -3.927205 | 8  | 3.385772  | 0.222900  | -2.024057 |

---

---

|    |           |           |           |   |           |           |           |
|----|-----------|-----------|-----------|---|-----------|-----------|-----------|
| 1  | -0.433574 | -3.175952 | -3.423451 | 8 | 4.843301  | 1.924005  | -0.797410 |
| 1  | 6.385538  | 1.708502  | 0.169303  | 6 | 4.765783  | -0.532217 | 0.180403  |
| 1  | 3.413277  | -1.441173 | 0.288273  | 6 | 6.104413  | -0.333088 | 0.542525  |
| 1  | 7.975638  | 0.241603  | 1.437441  | 6 | 4.105452  | -1.739178 | 0.462263  |
| 1  | 4.994074  | -2.892246 | 1.524540  | 6 | 6.784743  | -1.359420 | 1.210183  |
| 1  | 7.510483  | -3.348624 | 2.012739  | 6 | 4.803993  | -2.749583 | 1.127016  |
| 1  | 8.579885  | -1.946824 | 2.301942  | 6 | 6.149803  | -2.577842 | 1.514626  |
| 1  | 7.260663  | -2.319623 | 3.437405  | 6 | 6.879233  | -3.672927 | 2.255051  |
| 1  | 2.542456  | 1.674812  | 1.095133  | 6 | 1.214932  | 2.553046  | -1.339759 |
| 1  | 0.432670  | 1.817589  | 0.613860  | 6 | 1.876198  | 3.865575  | -0.957336 |
| 1  | 1.248588  | 2.090451  | -2.337267 | 6 | 2.974223  | 4.351023  | -1.689879 |
| 1  | -0.382858 | 2.333765  | -1.669886 | 6 | 1.383269  | 4.636245  | 0.115040  |
| 1  | 2.565629  | 4.031906  | -2.635191 | 6 | 3.569223  | 5.577492  | -1.362698 |
| 1  | -0.433856 | 4.030036  | 0.479842  | 6 | 1.980878  | 5.859501  | 0.445606  |
| 1  | 3.079233  | 6.414621  | -2.144545 | 6 | 3.075345  | 6.335034  | -0.292471 |
| 1  | 0.093980  | 6.404824  | 0.988891  | 1 | 1.712087  | -0.419044 | -1.843512 |
| 1  | 1.850302  | 7.615782  | -0.323185 | 1 | -0.840296 | -1.852026 | -1.195850 |
| 6  | -6.599844 | -0.234528 | -0.776426 | 1 | 2.084491  | -2.858316 | -3.435377 |
| 6  | -5.394669 | -0.872953 | -0.369230 | 1 | -0.029313 | -3.424088 | 0.301262  |
| 6  | -5.183307 | -2.220680 | -0.718725 | 1 | 3.520839  | -4.812648 | -2.923935 |
| 6  | -6.131533 | -2.927232 | -1.463963 | 1 | 1.399862  | -5.406220 | 0.803253  |
| 6  | -7.308687 | -2.282683 | -1.872032 | 1 | 3.185647  | -6.106796 | -0.810107 |
| 6  | -7.548109 | -0.942500 | -1.535023 | 1 | -1.153662 | -0.810642 | -3.402654 |
| 6  | -4.360675 | -0.113796 | 0.363514  | 1 | 0.369814  | -1.501595 | -4.023326 |
| 8  | -3.204298 | -0.690551 | 0.506617  | 1 | -0.994749 | -2.580807 | -3.621046 |
| 14 | -1.779121 | -0.179669 | 1.556080  | 1 | 6.594022  | 0.614487  | 0.302481  |

---



---

|    |           |           |           |   |           |           |           |
|----|-----------|-----------|-----------|---|-----------|-----------|-----------|
| 17 | -1.325002 | -2.373300 | 1.726783  | 1 | 3.059842  | -1.886990 | 0.178767  |
| 17 | 0.053339  | 0.329037  | 2.720735  | 1 | 7.830562  | -1.209833 | 1.500208  |
| 17 | -2.195575 | 2.014321  | 1.131011  | 1 | 4.290416  | -3.692087 | 1.345369  |
| 6  | -2.983595 | -0.187203 | 3.225617  | 1 | 7.964787  | -3.486674 | 2.289960  |
| 6  | -4.254435 | 0.434021  | 2.933598  | 1 | 6.520676  | -3.752157 | 3.297776  |
| 6  | -5.306044 | -0.218855 | 2.316693  | 1 | 6.714271  | -4.656978 | 1.783301  |
| 1  | -8.473665 | -0.460518 | -1.858052 | 1 | 2.828112  | 1.346581  | 1.166315  |
| 1  | -5.952016 | -3.972410 | -1.732385 | 1 | 0.799240  | 1.934462  | 0.682953  |
| 1  | -4.247995 | -2.689119 | -0.397934 | 1 | 1.672346  | 2.145700  | -2.256922 |
| 1  | -4.397749 | 0.983285  | 0.310463  | 1 | 0.143335  | 2.726725  | -1.554123 |
| 1  | -3.048300 | -1.254534 | 3.479704  | 1 | 3.374343  | 3.756818  | -2.517921 |
| 1  | -2.376910 | 0.369053  | 3.952955  | 1 | 0.516330  | 4.281064  | 0.683982  |
| 1  | -6.244276 | 0.305647  | 2.112903  | 1 | 4.425214  | 5.936483  | -1.943755 |
| 1  | -5.345580 | -1.313092 | 2.317907  | 1 | 1.583374  | 6.446772  | 1.280265  |
| 1  | -4.315926 | 1.525579  | 3.030584  | 1 | 3.540121  | 7.292440  | -0.033816 |
| 1  | -8.056535 | -2.823945 | -2.460843 | 1 | -8.302029 | 0.872149  | -3.006994 |
| 8  | -6.752662 | 1.062521  | -0.369258 | 8 | -6.466203 | -1.987944 | 0.096477  |
| 6  | -7.909376 | 1.771646  | -0.815741 | 6 | -7.485326 | -2.968340 | -0.102937 |
| 1  | -7.807812 | 2.787526  | -0.408788 | 1 | -7.489750 | -3.339120 | -1.144570 |
| 1  | -7.951845 | 1.818666  | -1.919516 | 1 | -7.238200 | -3.793722 | 0.579466  |
| 1  | -8.838887 | 1.311938  | -0.431319 | 1 | -8.485419 | -2.569086 | 0.148918  |

---

## References

1. Perrin, D. D.; Armarego, W. L. F.; Perrin, D. R. *Purification of Laboratory Chemicals*; Pergamon: New York, 1981.
2. Z. Li, B. Plancq and T. Ollevier, *Chem. Eur. J.*, 2012, **18**, 3144–3147.

3. J. F. Traverse, Y. Zhao, A. H. Hoveyda, and M. L. Snapper, *Org. Lett.* 2005, **7**, 3151–3154.
4. T. Shimada, A. Kina, S. Ikeda and T. Hayashi, *Org. Lett.*, 2002, **4**, 16, 2799-2801.
5. T. Shimada, A. Kina and T. Hayashi, *J. Org. Chem.*, 2003, **68**, 6329–6337.
6. T. Naicker, P. I. Arvidsson, H. G. Kruger, G. E. M. Maguire and T. Govender, *Eur. J. Org. Chem.*, 2011, 6923–6932.
7. P. Jain and J. C. Antilla, *J. Am. Chem. Soc.* 2010, **132**, 11884-11886.
8. L. -y. Liu, J. Sun, N. Liu, W. -x. Chang J. Li, *Tetrahedron: Asymmetry*, 2007, **18**, 710–716.
9. C. -H. Xing, Y. -X. Liao, Y. Zhang, D. Sabarova, M. Bassous and Q. -S. Hu, *Eur. J. Org. Chem.*, 2012, 1115–1118.
10. Y. Tanimura and K. Ishimaru, *Tetrahedron: Asymmetry*, 2012, **23**, 345–349.
11. A. Kina, T. Shimada and T. Hayashi, *Adv. Synth. Catal.*, 2004, **346**, 1169–1174.
